# Supplementary material for: Exploiting amphiphilicity: facile metal free access to thianthrenes and related sulphur heterocycles
Source: Royal Society of Chemistry journal article supplement (doi:10.1039/c5cc01757b), 2015-01-01
Supplement: c5cc01757b1.pdf [file c5cc01757b1.pdf]

# Exploiting amphiphilicity: Facile metal free access to thianthrenes and related sulphur heterocycles

Martin Pawliczek<sup>a,b</sup>, Lennart K. B. Garve,<sup>a</sup> and Daniel B. Werz<sup>a</sup>

<sup>a</sup> Institut für Organische Chemie, Technische Universität Braunschweig, Hagenring 30,  
D-38106 Braunschweig, Germany.

<sup>b</sup> Institut für Organische und Biomolekulare Chemie, Georg-August-Universität Göttingen,  
Tammannstr. 2, D-37077 Göttingen, Germany.

## Supplementary information

### Table of Contents

|                                                |     |
|------------------------------------------------|-----|
| General experimental                           | S02 |
| Syntheses and analytical data of the compounds | S03 |
| Procedures                                     | S03 |
| Copies of NMR spectra                          | S42 |
| Literature                                     | S78 |

## General experimental

All solvents were distilled before use unless otherwise stated. Air and moisture sensitive reactions were carried out in oven-dried or flame-dried glassware, septum-capped under atmospheric pressure of argon. Commercially available compounds were used without further purification unless otherwise stated.

Proton ( $^1\text{H}$ ) and carbon ( $^{13}\text{C}$ ) NMR spectra were recorded on a 300, 400 or 600 MHz instrument using the residual signals from tetramethylsilane (TMS)  $\delta = 0.00$  ppm, as internal references for  $^1\text{H}$  and  $^{13}\text{C}$  chemical shifts, respectively. Assignments of the respective signals were made by combination of H,H-COSY, HSQC and HMBC experiments. EI-HRMS mass spectrometry was carried out on JOEL AccuTOF GC JMS-T100GC instrument. ESI-HRMs mass spectrometry was carried out on a FTICR instrument. IR spectra were measured on an ATR spectrometer. UV spectra were measured with a common photometer.

The following aryne precursors and alkynes were applied in this manuscript.

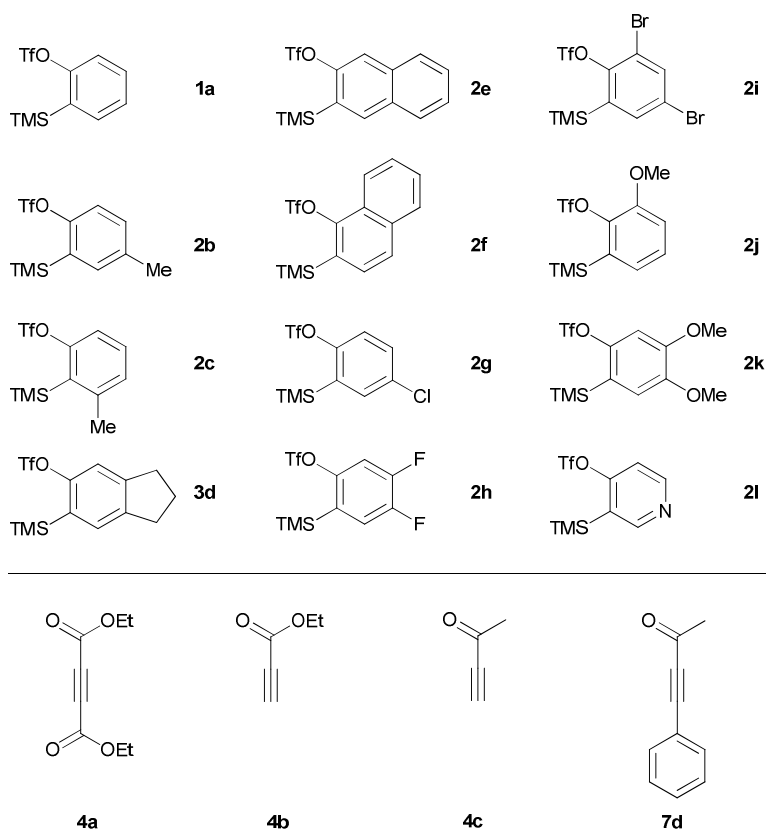

### General procedure for aryne reaction (GP1)

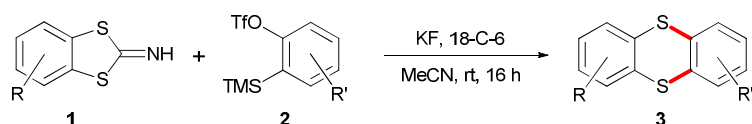

A mixture of dithioloimine **1** (1.0 equiv.), KF (3.0 equiv.) and 18-Crown-6 (3.0 equiv.) was prestirred in MeCN (0.05 M) for 2 min. Afterwards aryne precursor **2** (1.5 equiv.) was added and the reaction was further stirred at room temperature for additional 16 h. The solvent was removed *in vacuo* and the residue was purified by column chromatography on silica gel to obtain the corresponding thianthrene.

### General procedure for EWG-alkyne reaction (GP2)

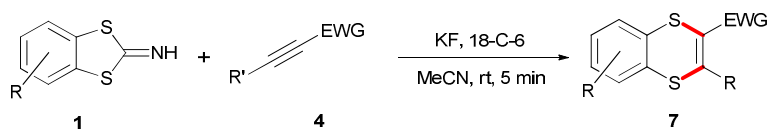

A mixture of dithioloimine **1** (1.0 equiv.), KF (3.0 equiv.) and 18-Crown-6 (3.0 equiv.) was prestirred in MeCN (0.1 M) for 2 min. Afterwards alkyne **4** (1.5 equiv.) was added dropwise at room temperature and the reaction was stirred for additional 5 min. The solvent was removed *in vacuo* and the residue was purified by column chromatography on silica gel to obtain the title compound.

### General procedure for EWG-alkyne reaction (GP3)

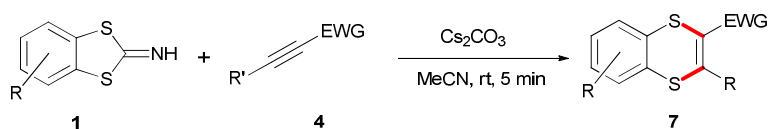

A mixture of dithioloimine **1** (1.0 equiv.) and Cs<sub>2</sub>CO<sub>3</sub> (3.0 equiv.) was prestirred in MeCN (0.1 M) for 2 min. Afterwards alkyne **4** (1.5 equiv.) was added dropwise at room temperature and the reaction was stirred for additional 5 min. The solvent was removed *in vacuo* and the residue was purified by column chromatography on silica gel to obtain the title compound.

## 1,2-Dithiocyanatobenzene (6a)

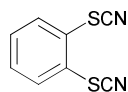

Benzene-1,2-thiol (500 mg, 3.51 mmol, 1.00 equiv.) in  $\text{CH}_2\text{Cl}_2$  (10 mL) was treated with trimethylamine (5 drops) and then the  $\text{SO}_2\text{Cl}_2$  (1.04 g, 7.72 mmol, 2.20 equiv.) was added dropwise at  $0\text{ }^\circ\text{C}$ . Stirring of the solution at  $0\text{ }^\circ\text{C}$  for 30 min was accompanied by the evolution of HCl gas.  $\text{CH}_2\text{Cl}_2$  was removed by evaporation and replaced with MeCN (10 mL), followed by the slow addition of TMSCN (776 mg, 7.72 mmol, 2.20 equiv.). The resulting brown solution was stirred at rt for 1 h. Evaporation of the solvent and purification of the crude residue by column chromatography on silica gel (pentane:EtOAc = 15:1) gave the title compound **6a** as a colorless solid (641 mg, 3.33 mmol, 95%).

**$^1\text{H-NMR}$**  (600 MHz,  $\text{CDCl}_3$ ):  $\delta$  = 7.55–7.59 (m, 2 H), 7.81–7.85 (m, 2 H) ppm.

**$^{13}\text{C-NMR}$**  (150 MHz,  $\text{CDCl}_3$ ):  $\delta$  = 108.1, 126.6, 131.6, 132.9 ppm.

**m.p.:**  $91\text{ }^\circ\text{C}$ .

**IR** (ATR):  $\tilde{\nu}$  ( $\text{cm}^{-1}$ ) = 3081, 2161, 1567, 1448, 1431.

**UV** ( $\text{CH}_3\text{CN}$ ):  $\lambda_{\text{max}}$  ( $\lg \epsilon$ ) = 279 nm (3.08), 236 (3.96), 207 (4.21).

**HRMS-EI:**  $\text{C}_8\text{H}_4\text{N}_4\text{S}_2$  calcd for  $[\text{M}]^+$ : 191.9816, found: 191.9827.

### 4-Methyl-1,2-dithiocyanatobenzene (**6b**)

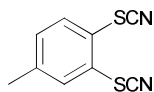

4-Methylbenzene-1,2-dithiol (600 mg, 3.84 mmol, 1.00 equiv.) in  $\text{CH}_2\text{Cl}_2$  (10 mL) was treated with trimethylamine (5 drops) and then  $\text{SO}_2\text{Cl}_2$  (1.14 g, 8.45 mmol, 2.20 equiv.) was added dropwise at 0 °C. Stirring of the solution at 0 °C for 30 min was accompanied by the evolution of HCl gas.  $\text{CH}_2\text{Cl}_2$  was removed by evaporation and replaced with MeCN (10 mL), followed by the slow addition of TMS-CN (838 mg, 8.45 mmol, 2.20 equiv.). The resulting brown solution was stirred at rt for 1 h. Evaporation of the solvent and purification of the crude residue by column chromatography on silica gel (pentane:EtOAc = 15:1) gave the title compound **6b** as a colorless solid (614 mg, 2.98 mmol, 78%).

**$^1\text{H-NMR}$**  (600 MHz,  $\text{CDCl}_3$ ):  $\delta$  = 2.45 (s, 3 H), 7.34 (dd,  $J$  = 8.1, 1.7, 0.7 Hz, 1 H), 7.63–7.64 m, 1 H) 7.68 (d,  $J$  = 8.1 Hz, 1 H) ppm.

**$^{13}\text{C-NMR}$**  (150 MHz,  $\text{CDCl}_3$ ):  $\delta$  = 21.2, 108.6, 108.6, 121.8, 127.8, 132.4, 132.8, 134.0, 143.5 ppm.

**m.p.:** 96 °C.

**IR** (ATR):  $\tilde{\nu}$  ( $\text{cm}^{-1}$ ) = 2160, 1582, 1461, 1386, 1386, 1270.

**UV** ( $\text{CH}_3\text{CN}$ ):  $\lambda_{\text{max}}$  ( $\lg \epsilon$ ) = 277 nm (3.02), 236 (3.98), 213 (4.26).

**HRMS-EI:**  $\text{C}_9\text{H}_6\text{N}_2\text{S}_2$  calcd for  $[\text{M}]^+$ : 205.9972, found: 205.9986.

## Benzo[d][1,3]dithiolo-2-imine (1a)

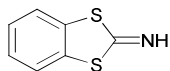

To a solution of 1,2-dithiocyanatobenzene **6a** (600 mg, 3.13 mmol, 1.0 equiv.) and CsF (710 mg, 4.70 mmol, 1.5 equiv.) in MeCN (30 mL) was added PPh<sub>3</sub> (900 mg, 3.44 mmol, 1.1 equiv.) and stirred at room temperature until TLC shows full conversion. Afterwards the solvent was removed *in vacuo* and the residue was purified by column chromatography on silica gel (pentane:EtOAc = 10:1→5:1) to obtain title compound **1a** (481 mg, 2.88 mmol, 92%) as a white solid.

**<sup>1</sup>H-NMR** (600 MHz, CDCl<sub>3</sub>): δ = 7.16–7.34 (m, 4 H), 8.83 (s, 1 H) ppm.

**<sup>13</sup>C-NMR** (150 MHz, CDCl<sub>3</sub>): δ = 121.6, 122.0, 126.0, 126.2, 134.4, 134.7, 172.5 ppm.

**m.p.:** 122 °C.

**IR** (ATR):  $\tilde{\nu}$  (cm<sup>-1</sup>) = 3176, 1700, 1550, 1431, 1236.

**UV** (CH<sub>3</sub>CN): λ<sub>max</sub> (lg ε) = 333 nm (2.31), 292 (3.40), 259 (3.85), 223 (4.60).

**HRMS-ESI:** C<sub>7</sub>H<sub>5</sub>NS<sub>2</sub> calcd for [M+Na]<sup>+</sup>: 189.9756, found: 189.9756.

### 5-Methylbenzo[d][1,3]dithiol-2-imine (1b)

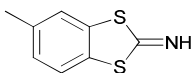

To a solution of **6b** (300 mg, 1.46 mmol, 1.0 equiv.) and CsF (331 mg, 2.19 mmol, 1.5 equiv.) in MeCN (15 mL) was added PPh<sub>3</sub> (420 mg, 1.60 mmol, 1.1 equiv.) and stirred at room temperature until TLC shows full conversion. Afterwards the solvent was removed *in vacuo* and the residue was purified by column chromatography on silica gel (pentane:EtOAc = 10:1→5:1) to obtain the title compound **1b** (240 mg, 1.33 mmol, 91%) as a pale orange solid.

**<sup>1</sup>H-NMR** (300 MHz, CDCl<sub>3</sub>): δ = 2.32 (d, *J* = 0.3 Hz, 3 H), 2.43 (s, 3 H), 6.99 (ddd, *J* = 8.1, 1.7, 0.7 Hz, 1 H), 7.07–7.16 (m, 2 H), 7.25 (ddd, *J* = 8.1, 1.7, 0.7 Hz, 1 H), 7.38–7.39 (m, 1 H), 7.44 (d, *J* = 8.2 Hz, 1 H), 8.79 (s, 1 H) ppm.

**<sup>13</sup>C-NMR** (75 MHz, CDCl<sub>3</sub>): δ = 21.0, 21.2, 113.8, 121.7, 121.7, 122.4, 122.4, 123.0, 123.5, 127.3, 127.1, 129.1, 131.3, 134.6, 136.5, 173.2 ppm.

**m.p.:** 94 °C.

**IR** (ATR):  $\tilde{\nu}$  (cm<sup>-1</sup>) = 3194, 2913, 2186, 1558, 1490, 1234.

**UV** (CH<sub>3</sub>CN): λ<sub>max</sub> (lg ε) = 323 nm (3.41), 303 (3.50), 261 (3.80), 248 (3.80), 223 (4.59).

**HRMS-ESI:** C<sub>8</sub>H<sub>7</sub>NS<sub>2</sub>                      calcd for [M+H]<sup>+</sup>: 182.0093, found: 182.0094.

## 6,7-Diphenyl-[1,3]dithiolo[4,5-g]quinoxalin-2-imine (1c)

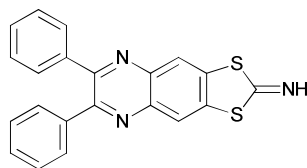

To a solution of 2,3-diphenylbenzo[5,6][1,4]dithiino[2,3-g]quinoxaline **6c**<sup>[1]</sup> (269 mg, 654  $\mu$ mol, 1.0 equiv.) and CsF (150 mg, 981  $\mu$ mol, 1.5 equiv.) in MeCN (20 mL) was added PPh<sub>3</sub> (188 mg, 719  $\mu$ mol, 1.1 equiv.) and stirred at room temperature until TLC shows full conversion. Afterwards the solvent was removed *in vacuo* and the residue was purified by column chromatography on silica gel (pentane:EtOAc = 5:1→2:1) to obtain title compound **1c** (131 mg, 353  $\mu$ mol, 54%) as a pale orange solid.

**<sup>1</sup>H-NMR** (300 MHz, DMSO<sub>d-6</sub>):  $\delta$  = 7.32-7.41 (m, 6 H), 7.43-7.47 (m, 4 H), 8.31 (s, 2 H), 11.00 (s, 1 H) ppm.

**<sup>13</sup>C-NMR** (75 MHz, DMSO<sub>d-6</sub>):  $\delta$  = 120.9, 128.1, 128.9, 128.9, 129.7, 138.5, 139.5, 152.8, 166.3 ppm.

**m.p.:** 220 °C (decomposition).

**IR** (ATR):  $\tilde{\nu}$  (cm<sup>-1</sup>) = 3167, 3063, 1577, 1344, 1225, 1100.

**UV** (CH<sub>3</sub>CN):  $\lambda_{\max}$  (lg  $\epsilon$ ) = 478 nm (2.68), 388 (4.33), 274 (4.64), 244 (4.47), 232 (4.47).

**HRMS-ESI:** C<sub>21</sub>H<sub>14</sub>N<sub>3</sub>S<sub>2</sub>      calcd for [M+H]<sup>+</sup>: 372.0624, found: 372.0623.



### [1,3]Dithiolo[4',5':4,5]benzo[1,2-c][1,2,5]thiadiazol-6-imine (1d)

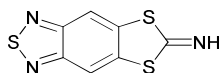

To a solution of 5,6-dithiocyanatobenzo[*c*][1,2,5]thiadiazole **6d**<sup>[2]</sup> (250 mg, 1.00 mmol, 1.0 equiv.) and CsF (228 mg, 1.50  $\mu$ mol, 1.5 equiv.) in MeCN (40 mL) was added PPh<sub>3</sub> (288 mg, 1.50 mmol, 1.1 equiv.) and stirred at room temperature until TLC shows full conversion. Afterwards the solvent was removed *in vacuo* and the residue was purified by column chromatography on silica gel (pentane:EtOAc = 3:1→1:1) to obtain title compound **1d** (97.4 mg, 433  $\mu$ mol, 43%) as a brown solid.

**<sup>1</sup>H-NMR, <sup>13</sup>C-NMR:** Decomposition in DMSO and insoluble in other solvents.

**m.p.:** 90-100 °C (decomposition).

**IR (ATR):**  $\tilde{\nu}$  (cm<sup>-1</sup>) = 3208, 3063, 1574, 1431, 1213, 1078.

**UV (CH<sub>3</sub>CN):**  $\lambda_{\text{max}}$  (lg  $\epsilon$ ) = 483 nm (2.46), 368 (4.09), 358 (4.10), 226 (4.48).

**HRMS-ESI:** C<sub>7</sub>H<sub>4</sub>N<sub>3</sub>S<sub>3</sub>                      calcd for [M+H]<sup>+</sup>: 225.9562, found: 225.9563.

## 2-Ethyl-5-thiocyanatopyrrole (**8b**)

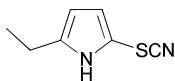

To a mixture of 2-ethylpyrrole (200 mg, 2.10 mmol, 1.0 equiv.) and KSCN (613 mg, 6.32 mmol, 3.0 equiv.) in MeCN (10 mL) was added bis(acetoxy)iodobenzene (744 mg, 2.31 mmol, 1.1 equiv.) at 0 °C. The mixture was slowly warmed up to room temperature over 1 h. Afterwards, the solvent was removed *in vacuo* and the residue was purified by column chromatography on silica gel (pentane:EtOAc = 30:1) to obtain the title compound **8b** (285 mg, 189  $\mu$ mol, 89%) as a colorless solid.

**<sup>1</sup>H-NMR** (400 MHz, CDCl<sub>3</sub>):  $\delta$  = 1.24 (t,  $J$  = 7.6 Hz, 3 H), 2.63 (q,  $J$  = 7.6 Hz, 2 H), 5.98 (ddt,  $J$  = 3.5, 2.7, 0.8 Hz, 1 H), 6.54 (dd,  $J$  = 3.6, 2.7 Hz, 1 H), 8.41 (s, 1 H) ppm.

**<sup>13</sup>C-NMR** (100 MHz, CDCl<sub>3</sub>):  $\delta$  = 13.1, 21.1, 100.2, 107.9, 111.0, 120.8, 141.3 ppm.

**m.p.:** 52 °C.

**IR** (ATR):  $\tilde{\nu}$  (cm<sup>-1</sup>) = 3337, 3138, 2976, 2150, 1564, 1137.

**UV** (CH<sub>3</sub>CN):  $\lambda_{\text{max}}$  (lg  $\epsilon$ ) = 242 nm (3.91).

**HRMS-EI:** C<sub>7</sub>H<sub>8</sub>N<sub>2</sub>S                      calcd for [M+Na]<sup>+</sup>: 175.0300, found: 175.0302.

### Thianthrene (3aa)

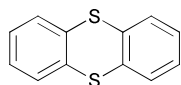

Dithioloimine **1a** (8.3 mg, 50.0  $\mu\text{mol}$ , 1.0 equiv.), aryne precursor **2a** (22.3 mg, 75.0  $\mu\text{mol}$ , 1.5 equiv.), KF (8.7 mg, 150  $\mu\text{mol}$ , 3.0 equiv.) and 18-Crown-6 (39.6 mg, 150  $\mu\text{mol}$ , 3.0 equiv.) in MeCN (1 mL) were reacted as described in the **GP1**. Compound **3aa** (10.3 mg, 47.7  $\mu\text{mol}$ , 95%) was obtained as a white solid.

The analytical data were in accordance with the reported ones.<sup>[3]</sup>

### Precedure for aryne reaction starting from dithiocyanate to thianthrene (3aa)

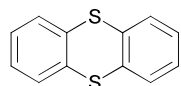

To a mixture of dithioloimine **1a** (8.3 mg, 50.0  $\mu\text{mol}$ , 1.0 equiv.), KF (8.7 mg, 150  $\mu\text{mol}$ , 3.0 equiv.) and 18-Crown-6 (39.6 mg, 150  $\mu\text{mol}$ , 3.0 equiv.) in MeCN (2 mL) was added aryne precursor **2a** (22.3 mg, 75.0  $\mu\text{mol}$ , 1.5 equiv.) and  $\text{PPh}_3$  (6.6 mg, 25  $\mu\text{mol}$ , 50 mol%). The reaction was stirred at room temperature for 16 h. The solvent was removed *in vacuo* and the residue was purified by column chromatography on silica gel (pentane) to obtain thianthrene (**3aa**) (7.0 mg, 32.4  $\mu\text{mol}$ , 65%) as a white solid.

The analytical data were in accordance with the reported ones.<sup>[3]</sup>

## 2-Methylthianthrene (3ab)

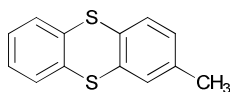

Dithioloimine **1a** (8.3 mg, 50.0  $\mu\text{mol}$ , 1.0 equiv.), aryne precursor **2b** (23.4 mg, 75.0  $\mu\text{mol}$ , 1.5 equiv.), KF (8.7 mg, 150  $\mu\text{mol}$ , 3.0 equiv.) and 18-Crown-6 (39.6 mg, 150  $\mu\text{mol}$ , 3.0 equiv.) in MeCN (1 mL) were reacted as described in the **GP1**. Compound **3ab** (8.9 mg, 38.6  $\mu\text{mol}$ , 77%) was obtained as a white solid.

**Column:** pentane

**$^1\text{H-NMR}$**  (600 MHz,  $\text{CDCl}_3$ ):  $\delta$  = 2.32 (s, 3 H), 7.04 (ddd,  $J$  = 7.9, 1.8, 0.7 Hz, 1 H), 7.20–7.24 (m, 2 H), 7.31 (dd,  $J$  = 1.2, 0.5 Hz, 1 H), 7.36 (d,  $J$  = 7.9 Hz, 1 H), 7.45–7.49 (m, 2 H) ppm.

**$^{13}\text{C-NMR}$**  (150 MHz,  $\text{CDCl}_3$ ):  $\delta$  = 20.9, 127.5, 127.6, 128.5, 128.6, 128.7, 128.7, 129.3, 132.0, 135.4, 135.7, 135.9, 137.9 ppm.

**m.p.:** 76 °C.

**IR** (ATR):  $\tilde{\nu}$  ( $\text{cm}^{-1}$ ) = 3051, 2918, 1440, 1425, 1256.

**UV** ( $\text{CH}_3\text{CN}$ ):  $\lambda_{\text{max}}$  ( $\lg \epsilon$ ) = 256 nm (4.54), 243 (4.24).

**HRMS-EI:**  $\text{C}_{13}\text{H}_{10}\text{S}_2$  calcd for  $[\text{M}]^+$ : 230.0224, found: 230.0236.

### 1-Methylthianthrene (3ac)

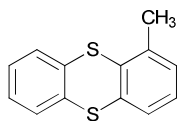

Dithioloimine **1a** (8.3 mg, 50.0  $\mu\text{mol}$ , 1.0 equiv.), aryne precursor **2c** (23.4 mg, 75.0  $\mu\text{mol}$ , 1.5 equiv.), KF (8.7 mg, 150  $\mu\text{mol}$ , 3.0 equiv.) and 18-Crown-6 (39.6 mg, 150  $\mu\text{mol}$ , 3.0 equiv.) in MeCN (1 mL) were reacted as described in the **GP1**. Compound **3ac** (9.1 mg, 39.6  $\mu\text{mol}$ , 79%) was obtained as a white solid.

**Column:** pentane

**$^1\text{H-NMR}$**  (600 MHz,  $\text{CDCl}_3$ ):  $\delta$  = 2.50 (s, 3 H), 7.11–7.15 (m, 2 H), 7.21–7.26 (m, 2 H), 7.33–7.36 (m, 1 H), 7.46–7.50 (m, 1 H), 7.50–7.53 (m, 1 H) ppm.

**$^{13}\text{C-NMR}$**  (150 MHz,  $\text{CDCl}_3$ ):  $\delta$  = 21.0, 126.6, 127.1, 127.5, 127.8, 128.5, 128.9, 129.0, 135.0, 135.4, 135.4, 136.0, 137.4 ppm.

**m.p.:** 72  $^\circ\text{C}$ .

**IR** (ATR):  $\tilde{\nu}$  ( $\text{cm}^{-1}$ ) = 3055, 1442, 1426, 1248, 1109.

**UV** ( $\text{CH}_3\text{CN}$ ):  $\lambda_{\text{max}}$  ( $\lg \epsilon$ ) = 278 nm (3.38), 257 (4.52), 241 (4.16).

**HRMS-EI:**  $\text{C}_{13}\text{H}_{10}\text{S}_2$  calcd for  $[\text{M}]^+$ : 230.0224, found: 230.0219.

### 2,3-Dihydro-1*H*-cyclopenta[*b*]thianthrene (**3ad**)

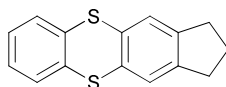

Dithioloimine **1a** (8.3 mg, 50.0  $\mu\text{mol}$ , 1.0 equiv.), aryne precursor **2d** (26.1 mg, 75.0  $\mu\text{mol}$ , 1.5 equiv.), KF (8.7 mg, 150  $\mu\text{mol}$ , 3.0 equiv.) and 18-Crown-6 (39.6 mg, 150  $\mu\text{mol}$ , 3.0 equiv.) in MeCN (1 mL) were reacted as described in the **GP1**. Compound **3ad** (7.4 mg, 28.9  $\mu\text{mol}$ , 58%) was obtained as a white solid.

**Column:** pentane

**$^1\text{H-NMR}$**  (600 MHz,  $\text{CDCl}_3$ ):  $\delta$  = 2.07 (q,  $J$  = 7.4 Hz, 2 H), 2.86 (t,  $J$  = 7.4 Hz, 4 H), 7.19–7.23 (m, 2 H), 7.35 (s, 2 H), 7.46–7.49 (m, 2 H) ppm.

**$^{13}\text{C-NMR}$**  (150 MHz,  $\text{CDCl}_3$ ):  $\delta$  = 25.7, 32.4, 124.6, 127.5, 128.7, 133.0, 136.3, 144.7 ppm.

**m.p.:** 94 °C.

**IR** (ATR):  $\tilde{\nu}$  ( $\text{cm}^{-1}$ ) = 2954, 2916, 2842, 1440, 1426, 1096.

**UV** ( $\text{CH}_3\text{CN}$ ):  $\lambda_{\text{max}}$  ( $\lg \epsilon$ ) = 286 nm (3.25), 258 (4.52), 242 (4.22), 196 (4.64).

**HRMS-EI:**  $\text{C}_{15}\text{H}_{12}\text{S}_2$  calcd for  $[\text{M}]^+$ : 256.0380, found: 256.0388.

### Benzo[*b*]thianthrene (3ae)

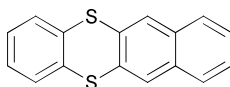

Dithioloimine **1a** (8.3 mg, 50.0  $\mu\text{mol}$ , 1.0 equiv.), aryne precursor **2e** (26.1 mg, 75.0  $\mu\text{mol}$ , 1.5 equiv.), KF (8.7 mg, 150  $\mu\text{mol}$ , 3.0 equiv.) and 18-Crown-6 (39.6 mg, 150  $\mu\text{mol}$ , 3.0 equiv.) in MeCN (1 mL) were reacted as described in the **GP1**. Compound **3ae** (9.7 mg, 36.4  $\mu\text{mol}$ , 73%) was obtained as a white solid.

**Column:** pentane

**$^1\text{H-NMR}$**  (600 MHz,  $\text{CDCl}_3$ ):  $\delta$  = 7.24–7.27 (m, 2 H), 7.43–7.47 (m, 2 H), 7.51–7.54 (m, 2 H), 7.72–7.76 (m, 2 H), 7.97 (s, 2 H) ppm.

**$^{13}\text{C-NMR}$**  (150 MHz,  $\text{CDCl}_3$ ):  $\delta$  = 126.6, 127.1, 127.2, 127.7, 128.9, 132.7, 133.2, 135.6 ppm.

**m.p.:** 166  $^\circ\text{C}$ .

**IR** (ATR):  $\tilde{\nu}$  ( $\text{cm}^{-1}$ ) = 3051, 2924, 1577, 1445, 1423, 1099.

**UV** ( $\text{CH}_3\text{CN}$ ):  $\lambda_{\text{max}}$  ( $\lg \epsilon$ ) = 326 nm (2.98), 274 (4.43), 259 (4.43), 230 (4.64), 214 (4.61).

**HRMS-EI:**  $\text{C}_{16}\text{H}_{10}\text{S}_2$

calcd for  $[\text{M}]^+$ : 266.0224, found: 266.0244.

### Benzo[a]thianthrene (3af)

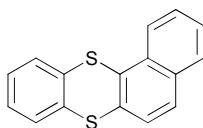

Dithioloimine **1a** (8.3 mg, 50.0  $\mu\text{mol}$ , 1.0 equiv.), aryne precursor **2f** (26.1 mg, 75.0  $\mu\text{mol}$ , 1.5 equiv.), KF (8.7 mg, 150  $\mu\text{mol}$ , 3.0 equiv.) and 18-Crown-6 (39.6 mg, 150  $\mu\text{mol}$ , 3.0 equiv.) in MeCN (1 mL) were reacted as described in the **GP1**. Compound **3af** (11.6 mg, 43.6  $\mu\text{mol}$ , 87%) was obtained as a white solid.

**Column:** pentane

**$^1\text{H-NMR}$**  (600 MHz,  $\text{CDCl}_3$ ):  $\delta$  = 7.24–7.29 (m, 2 H), 7.48–7.51 (m, 1 H), 7.52–7.55 (m, 2 H), 7.57–7.62 (m, 2 H), 7.72 (d,  $J$  = 8.5 Hz, 1 H), 7.82 (d,  $J$  = 8.1 Hz, 1 H), 8.46 (d,  $J$  = 8.5 Hz, 1 H) ppm.

**$^{13}\text{C-NMR}$**  (150 MHz,  $\text{CDCl}_3$ ):  $\delta$  = 124.3, 126.3, 126.3, 127.1, 127.7, 127.7, 127.9, 128.4, 128.5, 129.1, 132.1, 132.5, 132.8, 133.7, 135.2, 136.9 ppm.

**m.p.:** 85  $^\circ\text{C}$ .

**IR** (ATR):  $\tilde{\nu}$  ( $\text{cm}^{-1}$ ) = 3050, 2924, 1906, 1550, 1445, 1108.

**UV** ( $\text{CH}_3\text{CN}$ ):  $\lambda_{\text{max}}$  ( $\lg \epsilon$ ) = 315 nm (3.38), 266 (4.53), 224 (4.66).

**HRMS-EI:**  $\text{C}_{16}\text{H}_{10}\text{S}_2$  calcd for  $[\text{M}]^+$ : 266.0224, found: 266.0225.



## 2-Chlorothianthrene (3ag)

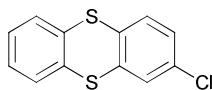

Dithioloimine **1a** (8.3 mg, 50.0  $\mu\text{mol}$ , 1.0 equiv.), aryne precursor **2g** (24.9 mg, 75.0  $\mu\text{mol}$ , 1.5 equiv.), KF (8.7 mg, 150  $\mu\text{mol}$ , 3.0 equiv.) and 18-Crown-6 (39.6 mg, 150  $\mu\text{mol}$ , 3.0 equiv.) in MeCN (1 mL) were reacted as described in the **GP1**. Compound **3ag** (8.6 mg, 34.3  $\mu\text{mol}$ , 69%) was obtained as a white solid.

**Column:** pentane

**$^1\text{H-NMR}$**  (600 MHz,  $\text{CDCl}_3$ ):  $\delta$  = 7.21 (ddd,  $J$  = 8.3, 2.2, 0.4 Hz, 1 H), 7.24–7.27 (m, 2 H), 7.38 (d,  $J$  = 8.3 Hz, 1 H), 7.46–7.49 (m, 3 H) ppm.

**$^{13}\text{C-NMR}$**  (150 MHz,  $\text{CDCl}_3$ ):  $\delta$  = 127.8, 127.9, 128.0, 128.4, 128.8, 128.8, 129.4, 133.6, 134.1, 134.8, 135.3, 137.5 ppm.

**m.p.:** 90 °C.

**IR** (ATR):  $\tilde{\nu}$  ( $\text{cm}^{-1}$ ) = 3070, 2925, 1545, 1439, 1426, 1091.

**UV** ( $\text{CH}_3\text{CN}$ ):  $\lambda_{\text{max}}$  ( $\lg \epsilon$ ) = 258 nm (4.60), 243 (4.24), 196 (4.66).

**HRMS-EI:**  $\text{C}_{12}\text{H}_7\text{ClS}_2$  calcd for  $[\text{M}]^+$ : 249.9678, found: 249.9696.

### 2,3-Difluorothianthrene (3ah)

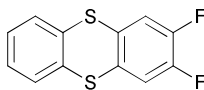

Dithioloimine **1a** (8.3 mg, 50.0  $\mu\text{mol}$ , 1.0 equiv.), aryne precursor **2h** (25.1 mg, 75.0  $\mu\text{mol}$ , 1.5 equiv.), KF (8.7 mg, 150  $\mu\text{mol}$ , 3.0 equiv.) and 18-Crown-6 (39.6 mg, 150  $\mu\text{mol}$ , 3.0 equiv.) in MeCN (1 mL) were reacted as described in the **GP1**. Compound **3ah** (9.3 mg, 36.9  $\mu\text{mol}$ , 74%) was obtained as a white solid.

**Column:** pentane

**$^1\text{H-NMR}$**  (600 MHz,  $\text{CDCl}_3$ ):  $\delta$  = 7.26–7.29 (m, 2 H), 7.31 (t,  $J$  = 8.6 Hz, 2 H), 7.47–7.50 (m, 2 H) ppm.

**$^{13}\text{C-NMR}$**  (150 MHz,  $\text{CDCl}_3$ ):  $\delta$  = 117.4 (dd,  $J$  = 14.3, 6.0 Hz), 128.1, 128.9, 131.9 (dd,  $J$  = 4.9 Hz), 134.9, 149.8 (dd,  $J$  = 253.3 Hz) ppm.

**$^{19}\text{F-NMR}$**  (376 MHz,  $\text{CDCl}_3$ ): –138.4 ppm.

**m.p.:** 109 °C.

**IR** (ATR):  $\tilde{\nu}$  ( $\text{cm}^{-1}$ ) = 3052, 2923, 1594, 1565, 1475, 1275.

**UV** ( $\text{CH}_3\text{CN}$ ):  $\lambda_{\text{max}}$  ( $\lg \epsilon$ ) = 286 nm (3.13), 254 (4.44), 241 (4.18).

**HRMS-EI:**  $\text{C}_{12}\text{H}_6\text{F}_2\text{S}_2$  calcd for  $[\text{M}]^+$ : 251.9879, found: 251.9876.

### 1,3-Dibromothianthrene (3ai)

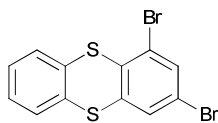

Dithioloimine **1a** (8.3 mg, 50.0  $\mu\text{mol}$ , 1.0 equiv.), aryne precursor **2i** (103 mg, 2.25  $\mu\text{mol}$ , 4.5 equiv.), KF (8.7 mg, 150  $\mu\text{mol}$ , 3.0 equiv.) and 18-Crown-6 (39.6 mg, 150  $\mu\text{mol}$ , 3.0 equiv.) in MeCN (1 mL) were reacted as described in the **GP1**. Compound **3ai** (8.3 mg, 22.2  $\mu\text{mol}$ , 44%) was obtained as a white solid.

**Column:** pentane

**$^1\text{H-NMR}$**  (600 MHz,  $\text{CDCl}_3$ ):  $\delta$  = 7.27–7.29 (m, 2 H), 7.46–7.48 (m, 1 H), 7.53–7.55 (m, 1 H), 7.57 (d,  $J$  = 1.9 Hz, 1 H), 7.66 (d,  $J$  = 1.9 Hz, 1 H) ppm.

**$^{13}\text{C-NMR}$**  (150 MHz,  $\text{CDCl}_3$ ):  $\delta$  = 120.9, 123.2, 128.2, 128.4, 128.5, 129.1, 130.3, 133.8, 134.6, 134.7, 136.5, 138.2 ppm.

**m.p.:** 108  $^\circ\text{C}$ .

**IR** (ATR):  $\tilde{\nu}$  ( $\text{cm}^{-1}$ ) = 3082, 3057, 2922, 1530, 1378, 1248.

**UV** ( $\text{CH}_3\text{CN}$ ):  $\lambda_{\text{max}}$  ( $\lg \epsilon$ ) = 264 nm (4.30), 244 (4.13), 205 (4.56).

**HRMS-EI:**  $\text{C}_{12}\text{H}_6\text{Br}_2\text{S}_2$  calcd for  $[\text{M}]^+$ : 371.8278, found: 371.8284.

### 1-Methoxythianthrene (3aj)

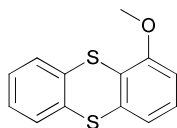

Dithioloimine **1a** (8.3 mg, 50.0  $\mu\text{mol}$ , 1.0 equiv.), aryne precursor **2j** (24.6 mg, 75.0  $\mu\text{mol}$ , 1.5 equiv.), KF (8.7 mg, 150  $\mu\text{mol}$ , 3.0 equiv.) and 18-Crown-6 (39.6 mg, 150  $\mu\text{mol}$ , 3.0 equiv.) in MeCN (1 mL) were reacted as described in the **GP1**. Compound **3aj** (11.8 mg, 48.0  $\mu\text{mol}$ , 96%) was obtained as a white solid.

**Column:** pentane:EtOAc = 100:1

**$^1\text{H-NMR}$**  (600 MHz,  $\text{CDCl}_3$ ):  $\delta$  = 3.92 (s, 3 H), 6.81 (dd,  $J$  = 8.2, 1.0 Hz, 1 H), 7.09 (dd,  $J$  = 7.8, 1.1 Hz, 1 H) 7.19 (d,  $J$  = 8.0 Hz, 1 H) 7.20–7.25 (m, 2 H), 7.43–7.46 (m, 1 H), 7.52–7.55 (m, 1 H) ppm.

**$^{13}\text{C-NMR}$**  (150 MHz,  $\text{CDCl}_3$ ):  $\delta$  = 56.2, 109.4, 121.2, 123.9, 127.6, 127.7, 128.1, 128.5, 129.0, 135.0, 135.5, 136.2, 156.8 ppm.

**m.p.:** 83  $^\circ\text{C}$ .

**IR** (ATR):  $\tilde{\nu}$  ( $\text{cm}^{-1}$ ) = 3059, 3007, 2833, 1570, 1557, 1453, 1425, 1260.

**UV** ( $\text{CH}_3\text{CN}$ ):  $\lambda_{\text{max}}$  ( $\lg \epsilon$ ) = 292 nm (3.67), 257 (4.41), 242 (4.20).

**HRMS-EI:**  $\text{C}_{13}\text{H}_{10}\text{OS}_2$  calcd for  $[\text{M}]^+$ : 246.0173, found: 246.0177.

### 2,3-Dimethoxythianthrene (3ak)

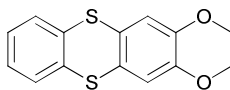

Dithioloimine **1a** (8.3 mg, 50.0  $\mu\text{mol}$ , 1.0 equiv.), aryne precursor **2k** (26.9 mg, 75.0  $\mu\text{mol}$ , 1.5 equiv.), KF (8.7 mg, 150  $\mu\text{mol}$ , 3.0 equiv.) and 18-Crown-6 (39.6 mg, 150  $\mu\text{mol}$ , 3.0 equiv.) in MeCN (1 mL) were reacted as described in the **GP1**. Compound **3ak** (8.8 mg, 31.9  $\mu\text{mol}$ , 64%) was obtained as a white solid.

**Column:** pentane:EtOAc = 40:1

**$^1\text{H-NMR}$**  (600 MHz,  $\text{CDCl}_3$ ):  $\delta$  = 3.87 (s, 6 H), 7.00 (s, 2 H), 7.22–7.25 (m, 2 H), 7.47–7.51 (m, 2 H) ppm.

**$^{13}\text{C-NMR}$**  (150 MHz,  $\text{CDCl}_3$ ):  $\delta$  = 56.2, 111.8, 126.8, 127.6, 128.7, 136.3, 148.9 ppm.

**m.p.:** 113  $^\circ\text{C}$ .

**IR** (ATR):  $\tilde{\nu}$  ( $\text{cm}^{-1}$ ) = 3003, 2932, 2840, 1584, 1427, 1251.

**UV** ( $\text{CH}_3\text{CN}$ ):  $\lambda_{\text{max}}$  ( $\lg \epsilon$ ) = 300 nm (3.44), 259 (4.37), 240 (4.36), 226 (4.32), 201 (4.56).

**HRMS-EI:**  $\text{C}_{14}\text{H}_{12}\text{O}_2\text{S}_2$  calcd for  $[\text{M}]^+$ : 276.0279, found: 276.0294.

### Benzo[5,6][1,4]dithiino[2,3-c]pyridine (**3al**)

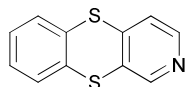

Dithioloimine **1a** (8.3 mg, 50.0  $\mu\text{mol}$ , 1.0 equiv.), aryne precursor **2l** (37.3 mg, 125  $\mu\text{mol}$ , 2.5 equiv.), KF (8.7 mg, 150  $\mu\text{mol}$ , 3.0 equiv.) and 18-Crown-6 (39.6 mg, 150  $\mu\text{mol}$ , 3.0 equiv.) in MeCN (1 mL) were reacted as described in the **GP1**. Compound **3al** (8.1 mg, 37.3  $\mu\text{mol}$ , 75%) was obtained as a purple solid.

**Column:** pentane:EtOAc = 25:1

**$^1\text{H-NMR}$**  (600 MHz,  $\text{CDCl}_3$ ):  $\delta$  = 7.27–7.31 (m, 2 H), 7.37 (dd,  $J$  = 5.1, 0.6 Hz, 1 H), 7.45–7.48 (m, 1 H), 7.48–7.52 (m, 1 H), 8.40 (d,  $J$  = 5.1 Hz, 1 H), 8.60 (s, 1 H) ppm.

**$^{13}\text{C-NMR}$**  (150 MHz,  $\text{CDCl}_3$ ):  $\delta$  = 122.8, 128.2, 128.4, 128.9, 129.2, 131.8, 133.3, 133.9, 146.5, 147.9, 148.0 ppm.

**m.p.:** 78  $^\circ\text{C}$ .

**IR** (ATR):  $\tilde{\nu}$  ( $\text{cm}^{-1}$ ) = 3051, 2921, 2851, 1545, 1443, 1389, 1266, 1107.

**UV** ( $\text{CH}_3\text{CN}$ ):  $\lambda_{\text{max}}$  ( $\lg \epsilon$ ) = 276 nm (3.41), 257 (4.17), 239 (4.00).

**HRMS-EI:**  $\text{C}_{11}\text{H}_7\text{N}_1\text{S}_2$  calcd for  $[\text{M}]^+$ : 217.0020, found: 217.0037.

### 2-Methylthianthrene (**3ba**) = (**3ab**)

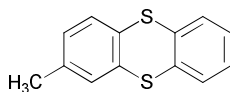

Dithioloimine **1b** (9.1 mg, 50.0  $\mu\text{mol}$ , 1.0 equiv.), aryne precursor **2a** (22.4 mg, 75.0  $\mu\text{mol}$ , 1.5 equiv.), KF (8.7 mg, 150  $\mu\text{mol}$ , 3.0 equiv.) and 18-Crown-6 (39.6 mg, 150  $\mu\text{mol}$ , 3.0 equiv.) in MeCN (1 mL) were reacted as described in the **GP1**. Compound **3ba** (8.2 mg, 35.6  $\mu\text{mol}$ , 71%) was obtained as a white solid.

Analytical data were identical with compound **3ab**.

## 2-Methylbenzo[*b*]thianthrene (**3be**)

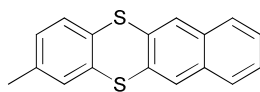

Dithioloimine **1b** (9.1 mg, 50.0  $\mu\text{mol}$ , 1.0 equiv.), aryne precursor **2e** (26.1 mg, 75.0  $\mu\text{mol}$ , 1.5 equiv.), KF (8.7 mg, 150  $\mu\text{mol}$ , 3.00 equiv.) and 18-Crown-6 (39.6 mg, 150  $\mu\text{mol}$ , 3.00 equiv.) in MeCN (1 mL) were reacted as described in the **GP1**. Compound **3be** (7.7 mg, 27.5  $\mu\text{mol}$ , 55%) was obtained as a white solid.

**Column:** pentane

**$^1\text{H-NMR}$**  (600 MHz,  $\text{CDCl}_3$ ):  $\delta$  = 2.33 (s, 3 H), 7.06 (ddd,  $J$  = 7.9, 1.8, 0.7 Hz, 1 H), 7.35 (dd,  $J$  = 1.1, 0.3 Hz, 1 H), 7.40 (d,  $J$  = 7.9 Hz, 1 H), 7.43–7.50 (m, 2 H), 7.72–7.75 (m, 2 H), 7.96 (s, 2 H) ppm.

**$^{13}\text{C-NMR}$**  (150 MHz,  $\text{CDCl}_3$ ):  $\delta$  = 20.9, 126.5, 126.6, 127.0, 127.0, 127.2, 127.2, 128.6, 128.6, 129.5, 132.0, 132.6, 132.6, 133.4, 133.6, 135.4, 137.9 ppm.

**m.p.:** 145 °C.

**IR** (ATR):  $\tilde{\nu}$  ( $\text{cm}^{-1}$ ) = 3034, 2915, 1567, 1487, 1463, 1104.

**UV** ( $\text{CH}_3\text{CN}$ ):  $\lambda_{\text{max}}$  ( $\lg \epsilon$ ) = 344 nm (2.91), 276 (4.41), 258 (4.49), 232 (4.63), 215 (4.62), 196 (4.43).

**HRMS-EI:**  $\text{C}_{17}\text{H}_{12}\text{S}_2$  calcd for  $[\text{M}]^+$ : 280.0380, found: 280.0394.



### 2,3-Difluoro-7-methylthianthrene (3bh)

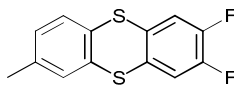

Dithioloimine **1b** (9.1 mg, 50.0  $\mu\text{mol}$ , 1.0 equiv.), aryne precursor **2h** (25.1 mg, 75.0  $\mu\text{mol}$ , 1.5 equiv.), KF (8.7 mg, 150  $\mu\text{mol}$ , 3.0 equiv.) and 18-Crown-6 (39.6 mg, 150  $\mu\text{mol}$ , 3.0 equiv.) in MeCN (1 mL) were reacted as described in the **GP1**. Compound **3bh** (8.2 mg, 30.8  $\mu\text{mol}$ , 62%) was obtained as a white solid.

**Column:** pentane

**$^1\text{H-NMR}$**  (600 MHz,  $\text{CDCl}_3$ ):  $\delta$  = 2.33 (s, 3 H), 7.08 (ddd,  $J$  = 7.9, 1.8, 0.7 Hz, 1 H), 7.28–7.32 (m, 3 H), 7.35 (d,  $J$  = 7.9 Hz, 1 H) ppm.

**$^{13}\text{C-NMR}$**  (150 MHz,  $\text{CDCl}_3$ ):  $\delta$  = 20.9, 117.3–117.3 (m), 117.3–117.5 (m), 128.6, 129.0, 129.4, 131.4, 132.1 (dd,  $J$  = 5.8, 3.8 Hz), 132.3 (dd,  $J$  = 5.8, 4.0 Hz), 134.8, 138.4, 148.9 (dd,  $J$  = 15.3, 1.7 Hz), 150.5 (dd,  $J$  = 15.2, 1.3 Hz) ppm.

**$^{19}\text{F-NMR}$**  (376 MHz,  $\text{CDCl}_3$ ):  $\delta$  = -138.6, -138.6 ppm.

**m.p.:** 82 °C.

**IR** (ATR):  $\tilde{\nu}$  ( $\text{cm}^{-1}$ ) = 3036, 2926, 1593, 1478, 1277.

**UV** ( $\text{CH}_3\text{CN}$ ):  $\lambda_{\text{max}}$  ( $\lg \epsilon$ ) = 255 nm (4.41), 242 (4.19).

**HRMS-EI:**  $\text{C}_{13}\text{H}_8\text{F}_2\text{S}_2$  calcd for  $[\text{M}]^+$ : 266.0030, found: 266.0036.

### 2,3-Dimethoxy-7-methylthianthrene (3bk)

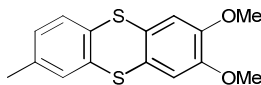

Dithioloimine **1b** (9.1 mg, 50.0  $\mu\text{mol}$ , 1.0 equiv.), aryne precursor **2k** (26.9 mg, 75.0  $\mu\text{mol}$ , 1.5 equiv.), KF (8.7 mg, 150  $\mu\text{mol}$ , 3.0 equiv.) and 18-Crown-6 (39.6 mg, 150  $\mu\text{mol}$ , 3.0 equiv.) in MeCN (1 mL) were reacted as described in the **GP1**. Compound **3bk** (10.2 mg, 35.1  $\mu\text{mol}$ , 70%) was obtained as a white solid.

**Column:** pentane:EtOAc = 40:1

**$^1\text{H-NMR}$**  (600 MHz,  $\text{CDCl}_3$ ):  $\delta$  = 2.32 (s, 3 H), 3.87 (s, 6 H), 7.00 (s, 2 H), 7.03–7.06 (m, 1 H), 7.31–7.33 (m, 1 H), 7.36 (d,  $J$  = 7.9 Hz, 1 H) ppm.

**$^{13}\text{C-NMR}$**  (150 MHz,  $\text{CDCl}_3$ ):  $\delta$  = 20.7, 55.9, 111.5, 111.5, 126.7, 127.0, 128.2, 128.2, 129.0, 132.5, 135.9, 137.5, 148.6, 148.6 ppm.

**m.p.:** 87 °C.

**IR** (ATR):  $\tilde{\nu}$  ( $\text{cm}^{-1}$ ) = 3048, 2918, 1443, 1121, 1035.

**UV** ( $\text{CH}_3\text{CN}$ ):  $\lambda_{\text{max}}$  ( $\lg \epsilon$ ) = 258 nm (4.61), 242 (4.27).

**HRMS-EI:**  $\text{C}_{15}\text{H}_{14}\text{O}_2\text{S}_2$  calcd for  $[\text{M}]^+$ : 290.0430, found: 290.0443.

### 2,3-Diphenylbenzo[5,6][1,4]dithiino[2,3-g]quinoxaline (3ca)

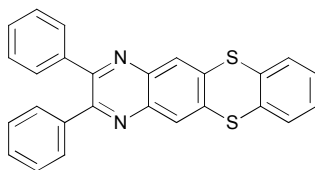

Dithioloimine **1c** (18.6 mg, 50.0  $\mu\text{mol}$ , 1.0 equiv.), aryne precursor **2a** (22.4 mg, 75.0  $\mu\text{mol}$ , 1.5 equiv.), KF (8.7 mg, 150  $\mu\text{mol}$ , 3.0 equiv.) and 18-Crown-6 (39.6 mg, 150  $\mu\text{mol}$ , 3.0 equiv.) in MeCN (2 mL) were reacted as described in the **GP1**. Compound **3ca** (14.4 mg, 34.3  $\mu\text{mol}$ , 69%) was obtained as a yellow solid.

**Column:** pentane:EtOAc = 10:1

**$^1\text{H-NMR}$**  (300 MHz,  $\text{CDCl}_3$ ):  $\delta$  = 7.28–7.38 (m, 8 H), 7.47–7.52 (m, 4 H), 7.55 (dd,  $J$  = 5.8, 3.3 Hz, 2 H), 8.25 (s, 2 H) ppm.

**$^{13}\text{C-NMR}$**  (75 MHz,  $\text{CDCl}_3$ ):  $\delta$  = 127.4, 128.1, 128.3, 128.9, 129.0, 129.8, 134.4, 138.1, 138.7, 140.6, 153.8 ppm.

**m.p.:** 144  $^\circ\text{C}$ .

**IR** (ATR):  $\tilde{\nu}$  ( $\text{cm}^{-1}$ ) = 3055, 2922, 1431, 1338, 1075.

**UV** ( $\text{CH}_3\text{CN}$ ):  $\lambda_{\text{max}}$  ( $\lg \epsilon$ ) = 386 nm (4.11), 287 (4.57), 256 (4.50), 207 (4.61).

**HRMS-ESI:**  $\text{C}_{26}\text{H}_{16}\text{N}_2\text{S}_2$  calcd for  $[\text{M}+\text{H}]^+$ : 421.0828, found: 421.0828.

## 1,7-Dimethylthianthrene (3bc) and 1,8-Dimethylthianthrene (3bc')

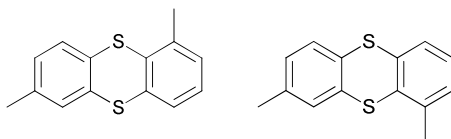

Dithioloimine **1b** (9.1 mg, 50.0  $\mu\text{mol}$ , 1.0 equiv.), aryne precursor **2c** (23.4 mg, 75.0  $\mu\text{mol}$ , 1.5 equiv.), KF (8.7 mg, 150  $\mu\text{mol}$ , 3.0 equiv.) and 18-Crown-6 (39.6 mg, 150  $\mu\text{mol}$ , 3.0 equiv.) in MeCN (1 mL) were reacted as described in the **GP1**. Compound **3bj** and **3bj'** (7.8 mg, 32.0  $\mu\text{mol}$ , 64%) were obtained as a colorless oil as inseparable mixture of regioisomers (ratio of 1:1).

**Column:** pentane

**$^1\text{H-NMR}$**  (600 MHz,  $\text{CDCl}_3$ ):  $\delta$  = 2.32 (s, 6 H), 2.49 (s, 6 H), 7.01–7.07 (m, 2 H), 7.10–7.14 (m, 4 H), 7.29–7.41 (m, 6 H) ppm.

**$^{13}\text{C-NMR}$**  (150 MHz,  $\text{CDCl}_3$ ):  $\delta$  = 20.9, 21.0, 21.0, 126.6, 126.6, 127.0, 127.0, 128.2, 128.4, 128.6, 128.9, 129.1, 129.5, 131.9, 132.5, 135.2, 135.3, 135.5, 135.6, 135.8, 135.9, 137.3, 137.4, 137.7, 137.9 ppm.

**HRMS-EI:**  $\text{C}_{14}\text{H}_{12}\text{S}_2$  calcd for  $[\text{M}]^+$ : 244.0375, found: 244.0381.

### 1-Methoxy-7-methylthianthrene (**3bj**) and 1-Methoxy-8-methylthianthrene (**3bj'**)

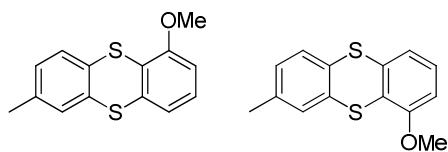

Dithioloimine **1b** (9.1 mg, 50.0  $\mu\text{mol}$ , 1.0 equiv.), aryne precursor **2j** (24.6 mg, 75.0  $\mu\text{mol}$ , 1.5 equiv.), KF (8.7 mg, 150  $\mu\text{mol}$ , 3.0 equiv.) and 18-Crown-6 (39.6 mg, 150  $\mu\text{mol}$ , 3.0 equiv.) in MeCN (1 mL) were reacted as described in the **GP1**. Compound **3bj** and **3bj'** (10.3 mg, 39.6  $\mu\text{mol}$ , 79%) were obtained as a colorless oil as inseparable mixture of regioisomers (ratio of 2:1).

**Column:** pentane

**$^1\text{H-NMR}$**  (600 MHz,  $\text{CDCl}_3$ ):  $\delta$  = 2.30 (s, 3 H), 2.31 (s, 3 H), 3.91 (s, 3 H), 3.91 (s, 3 H), 6.79–6.81 (m, 2 H), 7.01–7.05 (m, 2 H), 7.07–7.10 (m, 2 H), 7.16–7.20 (m, 2 H), 7.27–7.28 (m, 1 H), 7.32 (d,  $J$  = 7.7 Hz, 1 H), 7.36–7.37 (m, 1 H), 7.41 (d,  $J$  = 7.9 Hz, 1 H) ppm.

**$^{13}\text{C-NMR}$**  (150 MHz,  $\text{CDCl}_3$ ):  $\delta$  = 20.9, 20.9, 56.2, 56.2, 109.3, 109.3, 121.2, 121.2, 124.0, 124.3, 128.0, 128.0, 128.3, 128.5, 128.6, 128.7, 129.1, 129.6, 131.4, 132.0, 134.9, 135.4, 136.3, 136.7, 137.7, 137.9, 156.7, 156.8 ppm.

**HRMS-EI:**  $\text{C}_{14}\text{H}_{12}\text{OS}_2$  calcd for  $[\text{M}]^+$ : 260.0330, found: 260.0340.

## Dimethyl benzo[*b*][1,4]dithiine-2,3-dicarboxylate (**7aa**)

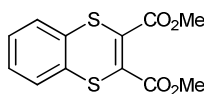

Dithioloimine **1a** (33.2 mg, 200  $\mu\text{mol}$ , 1.0 equiv.), KF (34.8 mg, 600  $\mu\text{mol}$ , 3.0 equiv.), 18-Crown-6 (158 mg, 600  $\mu\text{mol}$ , 3.0 equiv.) and acetylene dicarboxylic acid dimethylester (**4a**) (42.6 mg, 300  $\mu\text{mol}$ , 1.5 equiv.) in MeCN (2 mL) were reacted as described in the **GP2**. Compound **7aa** (46.2 mg, 149  $\mu\text{mol}$ , 75%) was obtained as a yellow solid.

**Column:** pentane:EtOAc = 50:1

**$^1\text{H-NMR}$**  (300 MHz,  $\text{CDCl}_3$ ):  $\delta$  = 3.85 (s, 6 H), 7.25–7.32 (m, 2 H), 7.37–7.44 (m, 2 H) ppm.

**$^{13}\text{C-NMR}$**  (75 MHz,  $\text{CDCl}_3$ ):  $\delta$  = 53.7, 129.0, 129.1, 133.4, 135.8, 163.4 ppm.

**m.p.:** 62  $^\circ\text{C}$ .

**IR** (ATR):  $\tilde{\nu}$  ( $\text{cm}^{-1}$ ) = 2951, 1718, 1579, 1451, 1235.

**UV** ( $\text{CH}_3\text{CN}$ ):  $\lambda_{\text{max}}$  ( $\lg \epsilon$ ) = 355 nm (2.97), 270 (3.96), 234 (4.15).

**HRMS-ESI:**  $\text{C}_{12}\text{H}_{10}\text{O}_4\text{S}_2$  calcd for  $[\text{M}+\text{Na}]^+$ : 304.9913, found: 304.9915.

## 2-Methylbenzo[*b*]thianthrene (7ab)

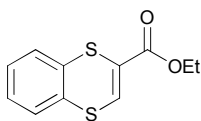

Dithioloimine **1a** (83.5 mg, 500  $\mu$ mol, 1.0 equiv.), KF (87.2 mg, 1.50 mmol, 3.0 equiv.), 18-Crown-6 (396 mg, 1.50 mmol, 3.0 equiv.) and ethyl propynoate (**4b**) (106 mg, 750  $\mu$ mol, 1.5 equiv.) in MeCN (5 mL) were reacted as described in the **GP2**. Compound **7ab** (67.4 mg, 283  $\mu$ mol, 57%) was obtained as a yellow oil.

**Column:** pentane:EtOAc:toluene = 250:1:0.1)

**<sup>1</sup>H-NMR** (300 MHz, CDCl<sub>3</sub>):  $\delta$  = 1.33 (t,  $J$  = 7.1 Hz, 3 H), 4.28 (q,  $J$  = 7.1 Hz, 2 H), 7.18–7.23 (m, 3 H), 7.26–7.38 (m, 1 H), 7.59 (s, 1 H) ppm.

**<sup>13</sup>C-NMR** (75 MHz, CDCl<sub>3</sub>):  $\delta$  = 14.2, 62.0, 127.6, 128.1, 128.1, 128.4, 128.7, 131.5, 132.2, 135.4, 161.3 ppm.

**IR** (ATR):  $\tilde{\nu}$  (cm<sup>-1</sup>) = 2980, 1705, 1575, 1451, 1220.

**UV** (CH<sub>3</sub>CN):  $\lambda_{\max}$  (lg  $\epsilon$ ) = 356 nm (2.96), 256 (4.17).

**HRMS-EI:** C<sub>11</sub>H<sub>10</sub>O<sub>2</sub>S<sub>2</sub> calcd for [M]<sup>+</sup>: 238.0117, found: 238.0130.

### 1-(Benzo[*b*][1,4]dithiin-2-yl)ethanone (**7ac**)

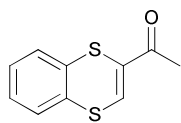

Dithioloimine **1a** (33.2 mg, 200  $\mu\text{mol}$ , 1.0 equiv.),  $\text{Cs}_2\text{CO}_3$  (90.6 mg, 600  $\mu\text{mol}$ , 3.0 equiv.) and but-3-yn-2-one (**4ac**) (20.4 mg, 300  $\mu\text{mol}$ , 1.5 equiv.) in MeCN (2 mL) were reacted as described in the **GP3**. Compound **7ac** (29.7 mg, 143  $\mu\text{mol}$ , 72%) was obtained as a yellow oil.

**Column:** pentane:EtOAc = 100:1

**$^1\text{H-NMR}$**  (400 MHz,  $\text{CDCl}_3$ ):  $\delta$  = 2.43 (s, 3 H), 7.19–7.24 (m, 3 H), 7.28–7.32 (m, 1 H), 7.51 (s, 1 H) ppm.

**$^{13}\text{C-NMR}$**  (100 MHz,  $\text{CDCl}_3$ ):  $\delta$  = 26.3, 127.5, 128.1, 128.6, 128.9, 131.3, 132.1, 135.9, 137.6, 190.2 ppm.

**IR** (ATR):  $\tilde{\nu}$  ( $\text{cm}^{-1}$ ) = 3038, 1666, 1542, 1452, 1358, 1222.

**UV** ( $\text{CH}_3\text{CN}$ ):  $\lambda_{\text{max}}$  ( $\lg \epsilon$ ) = 374 nm (3.03), 269 (4.13), 232 (4.10).

**HRMS-EI:**  $\text{C}_{10}\text{H}_8\text{OS}_2$  calcd for  $[\text{M}]^+$ : 230.9909, found: 230.9910.



### 1-(3-Phenylbenzo[*b*][1,4]dithiin-2-yl)ethanone (**7ad**)

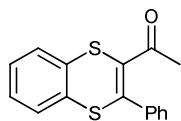

Dithioloimine **1a** (33.2 mg, 200  $\mu\text{mol}$ , 1.0 equiv.),  $\text{Cs}_2\text{CO}_3$  (90.6 mg, 600  $\mu\text{mol}$ , 3.0 equiv.) and 4-phenyl-3-butyne-2-one (**4ad**) (43.2 mg, 300  $\mu\text{mol}$ , 1.5 equiv.) in MeCN (2 mL) were reacted as described in the **GP3**. Compound **7ad** (43.9 mg, 154  $\mu\text{mol}$ , 77%) was obtained as a yellow oil.

**Column:** pentane:EtOAc = 80:1  $\rightarrow$  30:1

**$^1\text{H-NMR}$**  (300 MHz,  $\text{CDCl}_3$ ):  $\delta$  = 1.84 (s, 3 H), 7.25–7.32 (m, 2 H), 7.37–7.49 (m, 7 H) ppm.

**$^{13}\text{C-NMR}$**  (75 MHz,  $\text{CDCl}_3$ ):  $\delta$  = 29.7, 127.5, 127.9, 128.4, 128.6, 128.8, 129.8, 130.2, 131.2, 135.1, 135.4, 136.6, 149.5, 196.9 ppm.

**IR** (ATR):  $\tilde{\nu}$  ( $\text{cm}^{-1}$ ) = 359 nm (3.22), 264 (4.14), 242 nm (4.29).

**UV** ( $\text{CH}_3\text{CN}$ ):  $\lambda_{\text{max}}$  ( $\lg \epsilon$ ) = 3055, 1667, 1570, 1426, 1239, 1196.

**HRMS-ESI:**  $\text{C}_{16}\text{H}_{12}\text{OS}_2$  calcd for  $[\text{M}+\text{Na}]^+$ : 307.0222, found: 307.0225.

## Dimethyl 6-methylbenzo[*b*][1,4]dithiine-2,3-dicarboxylate (**7ba**)

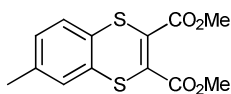

Dithioloimine **1b** (90.5 mg, 500  $\mu\text{mol}$ , 1.0 equiv.), KF (87.2 mg, 1.50 mmol, 3.0 equiv.), 18-Crown-6 (396 mg, 1.50 mmol, 3.0 equiv.) and acetylene dicarboxylic acid dimethylester (**4a**) (106 mg, 750  $\mu\text{mol}$ , 1.5 equiv.) in MeCN (5 mL) were reacted as described in the **GP2**. Compound **7ba** (106 mg, 358  $\mu\text{mol}$ , 72%) was obtained as a yellow solid.

**Column:** pentane:EtOAc = 50:1

**$^1\text{H-NMR}$**  (400 MHz,  $\text{CDCl}_3$ ):  $\delta$  = 2.31 (s, 3 H), 3.84 (s, 6 H), 7.08 (ddd,  $J$  = 8.0, 1.7, 0.7 Hz, 1 H), 7.20–7.22 (m, 1 H), 7.25–7.27 (m, 1 H) ppm.

**$^{13}\text{C-NMR}$**  (100 MHz,  $\text{CDCl}_3$ ):  $\delta$  = 20.7, 53.2, 128.2, 129.1, 129.4, 129.5, 132.9, 135.3, 135.7, 139.0, 163.0 ppm.

**m.p.:** 65  $^\circ\text{C}$ .

**IR** (ATR):  $\tilde{\nu}$  ( $\text{cm}^{-1}$ ) = 2952, 1720, 1575, 1432, 1240, 1012.

**UV** ( $\text{CH}_3\text{CN}$ ):  $\lambda_{\text{max}}$  ( $\lg \epsilon$ ) = 354 nm (2.94), 271 (3.93), 235 (4.21).

**HRMS-ESI:**  $\text{C}_{13}\text{H}_{12}\text{O}_4\text{S}_2$  calcd for  $[\text{M}+\text{Na}]^+$ : 319.0069, found: 319.0071.

### Dimethyl 7,8-diphenyl-[1,4]dithiino[2,3-g]quinoxaline-2,3-dicarboxylate (**7ca**)

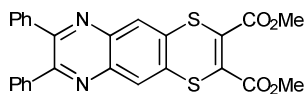

Dithioloimine **1c** (26.0 mg, 70  $\mu\text{mol}$ , 1.0 equiv.), KF (12.2 mg, 210  $\mu\text{mol}$ , 3.0 equiv.) and 18-Crown-6 (55.4 mg, 210  $\mu\text{mol}$ , 3.0 equiv.) and acetylene dicarboxylic acid dimethylester (**4a**) (14.9 mg, 105  $\mu\text{mol}$ , 1.5 equiv.) in MeCN (1.4 mL) were reacted as described in the **GP2**. Compound **7ca** (25.6 mg, 52.6  $\mu\text{mol}$ , 75%) was obtained as a yellow solid.

**Column:** pentane:EtOAc = 20:1

**$^1\text{H-NMR}$**  (400 MHz,  $\text{CDCl}_3$ ):  $\delta$  = 3.89 (s, 6 H), 7.30–7.40 (m, 6 H), 7.47–7.50 (m, 4 H), 8.12 (s, 2 H) ppm.

**$^{13}\text{C-NMR}$**  (100 MHz,  $\text{CDCl}_3$ ):  $\delta$  = 53.5, 127.6, 128.3, 129.2, 129.8, 134.3, 134.8, 138.4, 140.9, 154.4, 162.8 ppm.

**m.p.:** 151  $^\circ\text{C}$ .

**IR** (ATR):  $\tilde{\nu}$  ( $\text{cm}^{-1}$ ) = 2954, 1719, 1577, 1434, 1248.

**UV** ( $\text{CH}_3\text{CN}$ ):  $\lambda_{\text{max}}$  ( $\lg \epsilon$ ) = 384 nm (4.12), 288 (4.46), 238 (4.57).

**HRMS-ESI:**  $\text{C}_{26}\text{H}_{18}\text{N}_2\text{O}_4\text{S}_2$  calcd for  $[\text{M}+\text{Na}]^+$ : 509.0600, found: 509.0600.

**Dimethyl [1,4]dithiino[2',3':4,5]benzo[1,2-c][1,2,5]thiadiazole-6,7-dicarboxylate  
(7da)**

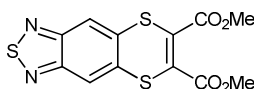

Dithioloimine **1d** (22.4 mg, 100  $\mu$ mol, 1.0 equiv.), KF (17.5 mg, 300  $\mu$ mol, 3.0 equiv.), 18-Crown-6 (79 mg, 300  $\mu$ mol, 3.0 equiv.) and acetylene dicarboxylic acid dimethylester (**4a**) (21.3 mg, 150  $\mu$ mol, 1.5 equiv.) in MeCN (2 mL) were reacted as described in the **GP2**. Compound **7da** (22.5 mg, 66.2  $\mu$ mol, 66%) was obtained as a yellow solid.

**Column:** pentane:EtOAc = 20:1

**$^1\text{H-NMR}$**  (400 MHz,  $\text{CDCl}_3$ ):  $\delta$  = 3.89 (s, 6 H), 8.02 (s, 2 H) ppm.

**$^{13}\text{C-NMR}$**  (100 MHz,  $\text{CDCl}_3$ ):  $\delta$  = 53.5, 119.3, 134.4, 135.7, 154.3, 162.7 ppm.

**m.p.:** 92  $^\circ\text{C}$ .

**IR** (ATR):  $\tilde{\nu}$  ( $\text{cm}^{-1}$ ) = 2958, 1709, 1569, 1427, 1224, 1075.

**UV** ( $\text{CH}_3\text{CN}$ ):  $\lambda_{\text{max}}$  ( $\lg \epsilon$ ) = 366 nm (3.95), 294 (3.84), 281 (3.90), 231 (4.42).

**HRMS-ESI:**  $\text{C}_{12}\text{H}_8\text{N}_2\text{O}_4\text{S}_3$  calcd for  $[\text{M}+\text{Na}]^+$ : 362.9538, found: 362.9541.

## 2-Methylbenzo[*b*]thianthrene (**9**)

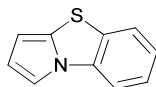

To a stirred solution of 2-thiocyanatopyrrole (**8a**)<sup>[4]</sup> (12.4 mg, 100  $\mu$ mol, 1.0 equiv.) and aryne precursor **2a** (44.7 mg, 1.50 mmol, 1.5 equiv.) in THF (4 mL) at 50 °C was added in one portion TBAF (1 M in THF, 600  $\mu$ L, 600  $\mu$ mol, 6.0 equiv.) and stirred for addition 10 min. After cooling to room temperature the solvent was removed *in vacuo* and the residue was purified by column chromatography on basic alumina oxide (pentane:EtOAc = 200:1) to obtain the title compound **9** (7.8 mg, 45.1  $\mu$ mol, 45%) as a white solid.

The analytical data were in accordance with the reported ones.<sup>[5]</sup>

### 1-(3-Phenylpyrrolo[2,1-*b*]thiazol-2-yl)ethanone (10ad)

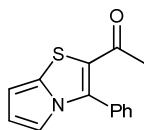

To a solution of 4-phenyl-3-butyne-2-one (**4d**)<sup>[4]</sup> (576 mg, 4.00 mmol, 20 equiv.) and Cs<sub>2</sub>CO<sub>3</sub> (98 mg, 300 μmol, 1.5 equiv.) in MeCN (2 mL) was added dropwise 2-thiocyanatopyrrole<sup>[4]</sup> (**8a**) (24.8 mg, 200 μmol, 1.0 equiv.) dissolved in MeCN (1 mL) over 10 min at room temperature. Afterwards, the solvent was removed *in vacuo* and the residue was purified by column chromatography on silica gel (pentane:EtOAc = 50:1→30:1) to obtain the title compound **10ad** (24.3 mg, 101 μmol, 50%) as a brown oil.

**<sup>1</sup>H-NMR** (300 MHz, CDCl<sub>3</sub>): δ = 2.02 (s, 3 H), 6.23 (dd, *J* = 3.6, 1.2 Hz, 1 H), 6.59 (dd, *J* = 3.6, 3.0 Hz, 1 H), 6.72 (dd, *J* = 3.0, 1.2 Hz, 1 H), 7.47–7.59 (m, 2 H) 7.58–7.62 (m, 3 H) ppm.

**<sup>13</sup>C-NMR** (75 MHz, CDCl<sub>3</sub>): δ = 28.8, 98.5, 111.2, 117.1, 128.7, 129.0, 129.4, 129.6, 129.7, 130.7, 137.9, 191.3 ppm.

**IR** (ATR):  $\tilde{\nu}$  (cm<sup>-1</sup>) = 3058, 1646, 1563, 1449, 1330, 1195.

**UV** (CH<sub>3</sub>CN): λ<sub>max</sub> (lg ε) = 369 nm (3.46), 294 (4.04), 227 (4.17).

**HRMS-ESI**: C<sub>14</sub>H<sub>11</sub>NOS                      calcd for [M+Na]<sup>+</sup>: 264.0454, found: 264.0455.

## Dimethyl 5-ethylpyrrolo[2,1-*b*]thiazole-2,3-dicarboxylate (10ba)

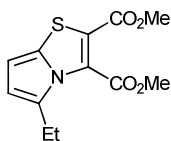

To a solution of acetylene dicarboxylic acid dimethylester (**4a**) (568 mg, 4.00 mmol, 20 equiv.) and  $\text{Cs}_2\text{CO}_3$  (98 mg, 300  $\mu\text{mol}$ , 1.5 equiv.) in MeCN (2 mL) was added dropwise thiocyanatopyrrole **8b** (33.5 mg, 200  $\mu\text{mol}$ , 1.0 equiv.) dissolved in MeCN (1 mL) over 10 min at room temperature. Afterwards, the solvent was removed *in vacuo* and the residue was purified by column chromatography on silica gel (pentane:EtOAc = 50:1). Afterwards, drying *in high vacuo* to remove volatile impurities, the title compound **11ba** (33.9 mg, 128  $\mu\text{mol}$ , 63%) was obtained as a yellow solid.

**$^1\text{H-NMR}$**  (400 MHz,  $\text{CDCl}_3$ ):  $\delta$  = 1.27 (t,  $J$  = 7.4 Hz, 3 H), 2.64 (qd,  $J$  = 7.4, 1.0 Hz, 2 H), 3.87 (s, 3 H), 4.04 (s, 3 H), 6.16 (d,  $J$  = 3.7 Hz, 1 H), 6.37 (dt,  $J$  = 3.7, 1.0 Hz, 1 H) ppm.

**$^{13}\text{C-NMR}$**  (100 MHz,  $\text{CDCl}_3$ ):  $\delta$  = 12.3, 19.4, 52.7, 53.6, 97.7, 114.0, 117.5, 128.5, 130.4, 161.5, 161.8 ppm.

**m.p.:** 78 °C.

**IR** (ATR):  $\tilde{\nu}$  ( $\text{cm}^{-1}$ ) = 2950, 1735, 1708, 1581, 1316, 1236.

**UV** ( $\text{CH}_3\text{CN}$ ):  $\lambda_{\text{max}}$  ( $\lg \epsilon$ ) = 369 nm (3.24), 285 (3.99), 228 (4.13).

**HRMS-ESI:**  $\text{C}_{12}\text{H}_{13}\text{NO}_4\text{S}$  calcd for  $[\text{M}+\text{Na}]^+$ : 290.0457, found: 290.0460.

### Ethyl 5-ethylpyrrolo[2,1-*b*]thiazole-2-carboxylate (**10bb**)

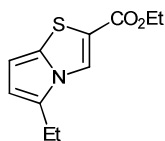

To a solution of ethyl propynoate (**4b**) (392 mg, 4.00 mmol, 20 equiv.) and Cs<sub>2</sub>CO<sub>3</sub> (98 mg, 300 μmol, 1.5 equiv.) in MeCN (2 mL) was added dropwise thiocyanatopyrrole **8b** (33.5 mg, 200 μmol, 1.0 equiv.) dissolved in MeCN (1 mL) over 10 min at room temperature. Afterwards, the solvent was removed *in vacuo* and the residue was purified by column chromatography on silica gel (pentane:EtOAc = 70:1). Afterwards, drying *in high vacuo* to remove volatile impurities, the title compound **10bb** (27.1 mg, 122 μmol, 61%) was obtained as a yellow oil.

**<sup>1</sup>H-NMR** (300 MHz, CDCl<sub>3</sub>): δ = 1.31 (t, *J* = 7.5 Hz, 3 H), 1.38 (t, *J* = 7.1 Hz, 3 H), 2.78 (qd, *J* = 7.5, 0.9 Hz, 2 H), 4.36 (q, *J* = 7.1 Hz, 2 H), 6.10 (dd, *J* = 3.6, 0.7 Hz, 1 H), 6.33 (dt, *J* = 3.6, 1.0 Hz, 1 H), 7.98 (d, *J* = 0.7 Hz, 1 H) ppm.

**<sup>13</sup>C-NMR** (75 MHz, CDCl<sub>3</sub>): δ = 12.6, 14.3, 19.9, 61.5, 97.2, 112.8, 120.0, 124.6, 127.3, 128.8, 162.2 ppm.

**IR** (ATR):  $\tilde{\nu}$  (cm<sup>-1</sup>) = 3112, 2938, 1706, 1582, 1225.

**UV** (CH<sub>3</sub>CN): λ<sub>max</sub> (lg ε) = 354 nm (3.30), 282 (4.02), 229 (4.08).

**HRMS-ESI**: C<sub>11</sub>H<sub>13</sub>NO<sub>2</sub>S calcd for [M+Na]<sup>+</sup>: 246.0559, found: 246.0561.



## Observed side products to support the mechanistic scenario

### Phenyl(2-thiocyanatophenyl)sulfane(12a)

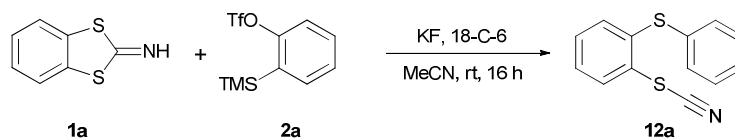

<sup>1</sup>H-NMR (600 MHz, CDCl<sub>3</sub>):  $\delta$  = 7.19–7.22 (m, 2 H), 7.26–7.28 (m, 1 H), 7.29–7.34 (m, 2 H), 7.34–7.36 (m, 1 H), 7.43–7.48 (m, 2 H), 7.76 (ddd,  $J$  = 8.0, 1.3, 0.4 Hz, 1 H) ppm.

<sup>13</sup>C-NMR (150 MHz, CDCl<sub>3</sub>):  $\delta$  = 110.4, 127.4, 128.7, 129.4, 129.5, 129.6, 130.2, 131.0, 133.0, 134.2, 135.3 ppm.

GCMS-EI: C<sub>13</sub>H<sub>9</sub>NS<sub>2</sub> found: 243.1.

In the case of the thianthrene synthesis starting from aryne precursor **2a** and benzodithioleimine **1a** traces of compound **12a** were isolated.

### (E)-Ethyl 3-((2-thiocyanatophenyl)thio)acrylate (13b)

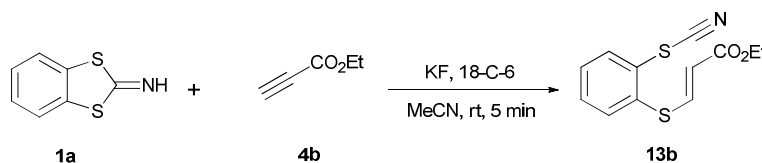

GCMS-EI: C<sub>12</sub>H<sub>11</sub>NO<sub>2</sub>S<sub>2</sub> found: 243.1.

In the case of the benzo[b][1,4]dithiine synthesis the side product **13b** could not be isolated and was just observed by GC-MS.

Because of the observation of these side products which are protonated species of the proposed intermediates **A** and **B** in Scheme 4, the proposed mechanistic scenarios seem to be plausible.

# 1,2-Dithiocyanatobenzene (6a)

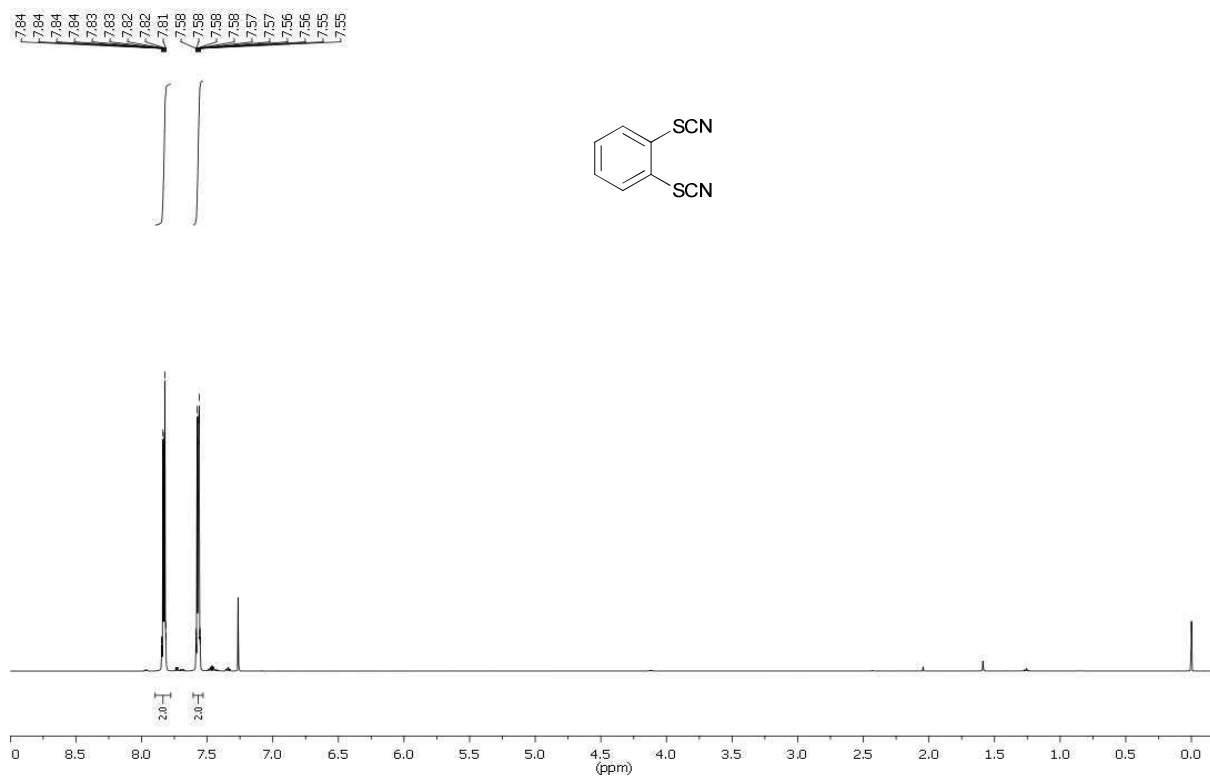

<sup>1</sup>H-NMR (600 MHz, CDCl<sub>3</sub>)

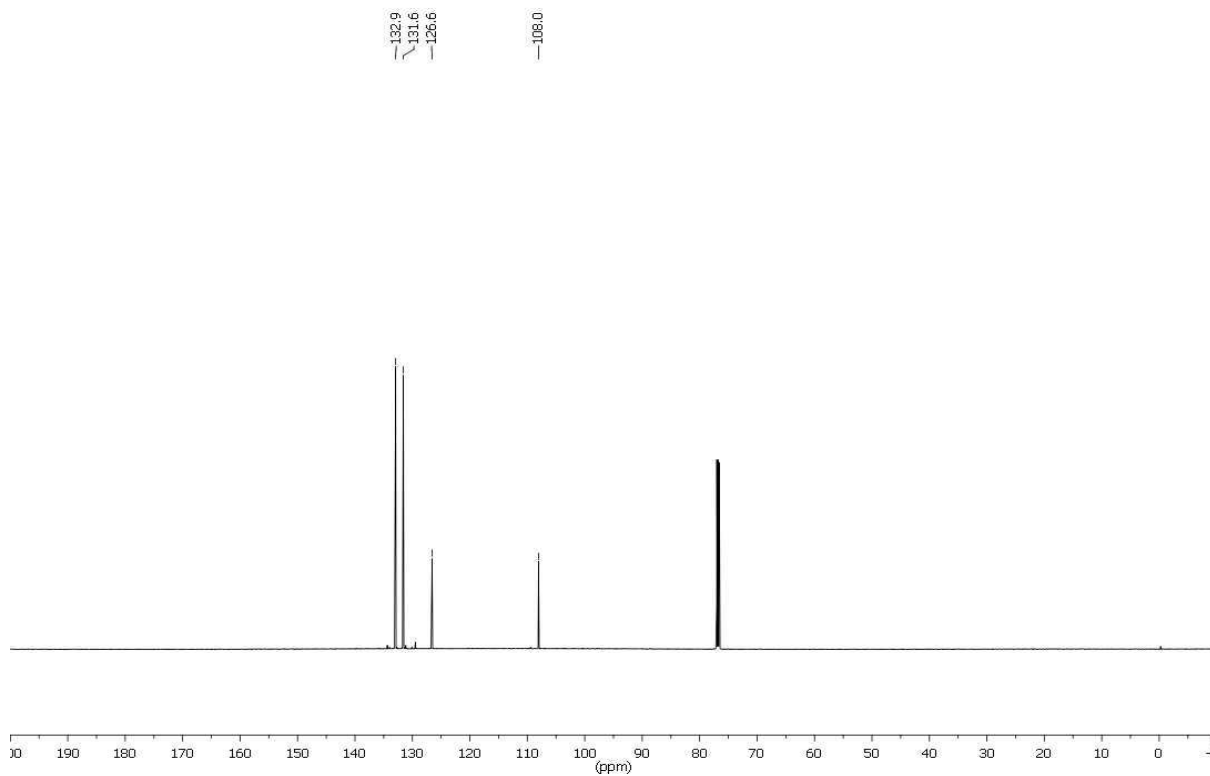

<sup>13</sup>C-NMR (150 MHz, CDCl<sub>3</sub>)

### 4-Methyl-1,2-dithiocyanatobenzene (6b)

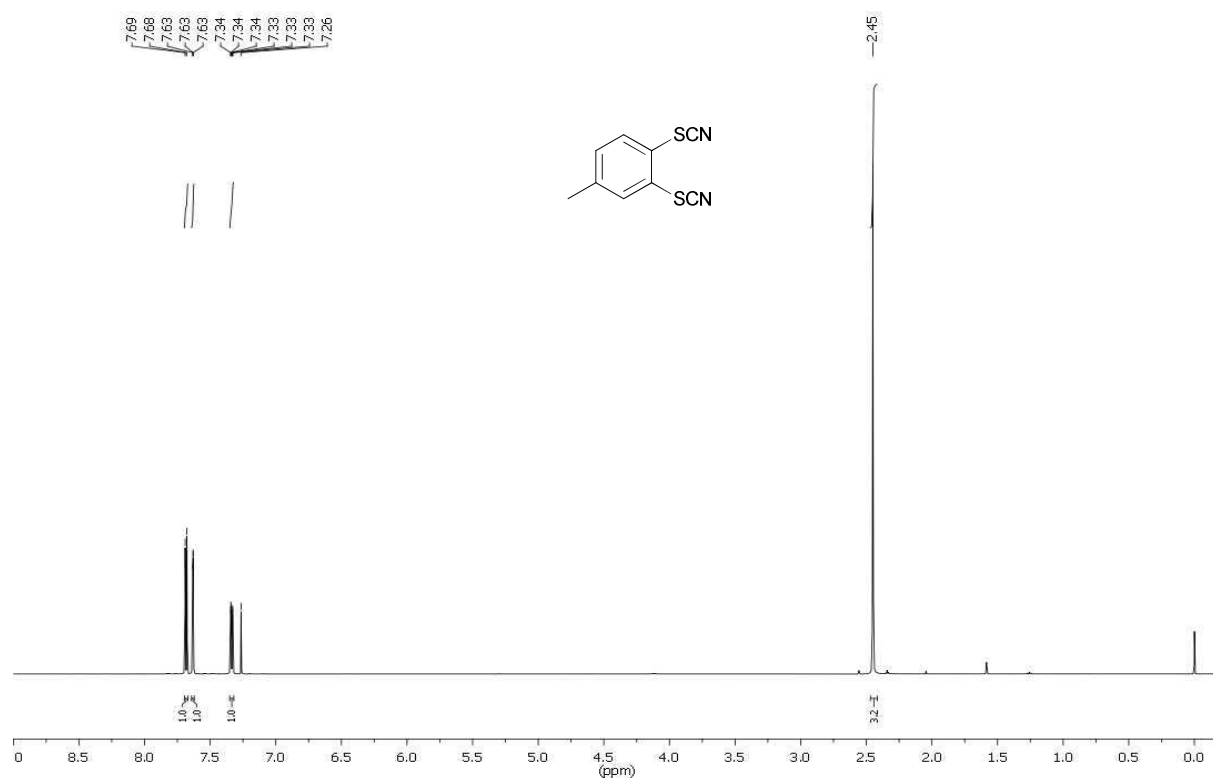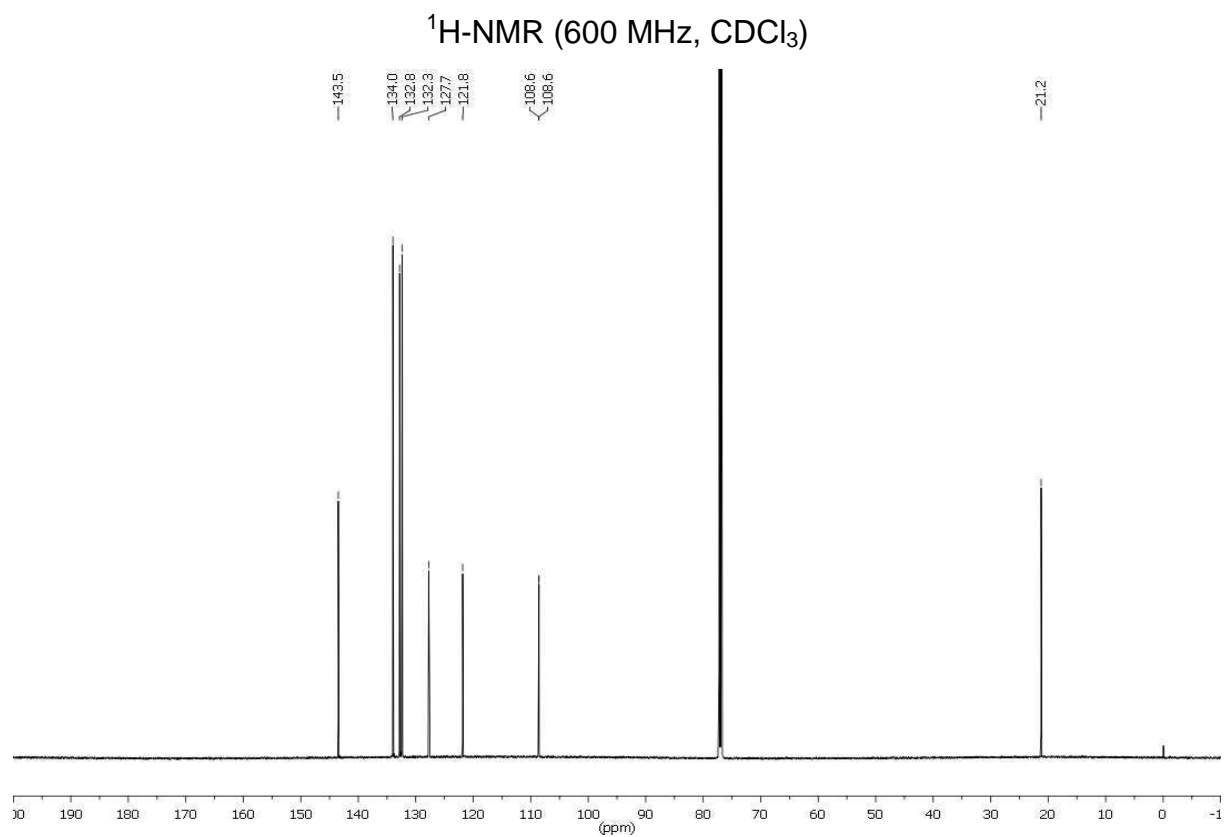

# Benzo[d][1,3]dithiol-2-imine (1a)

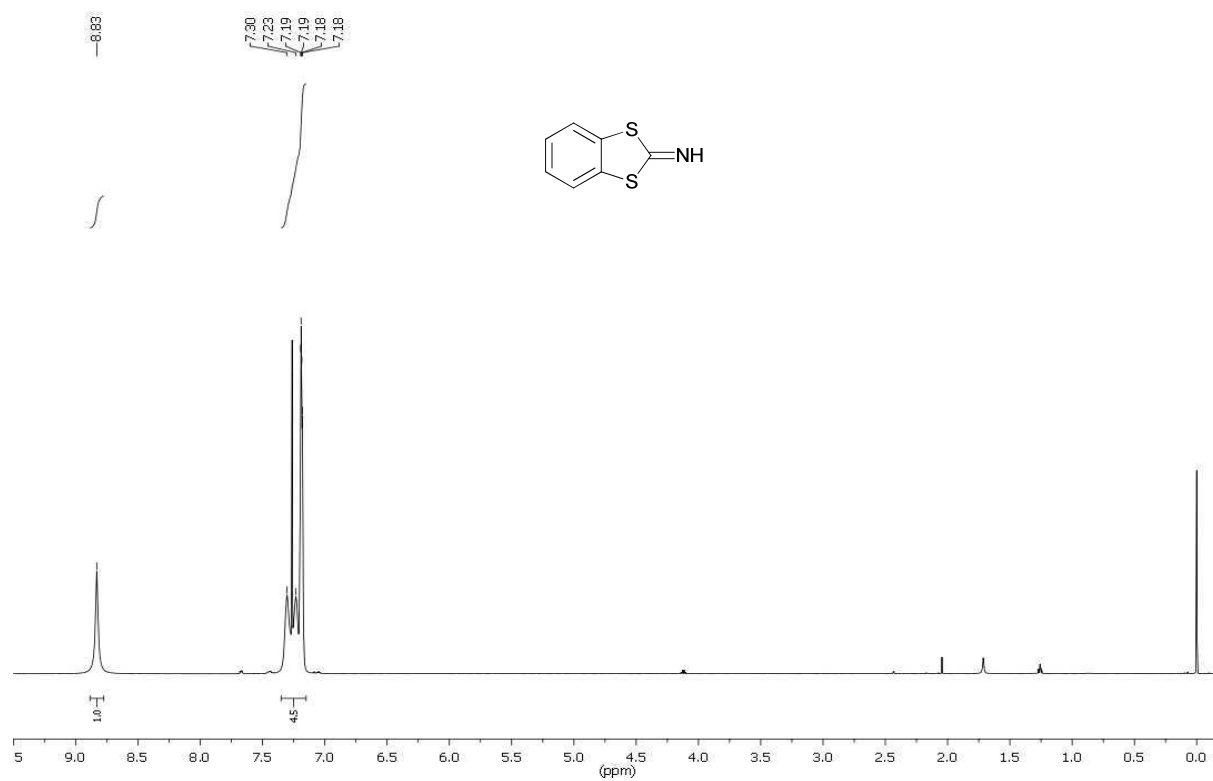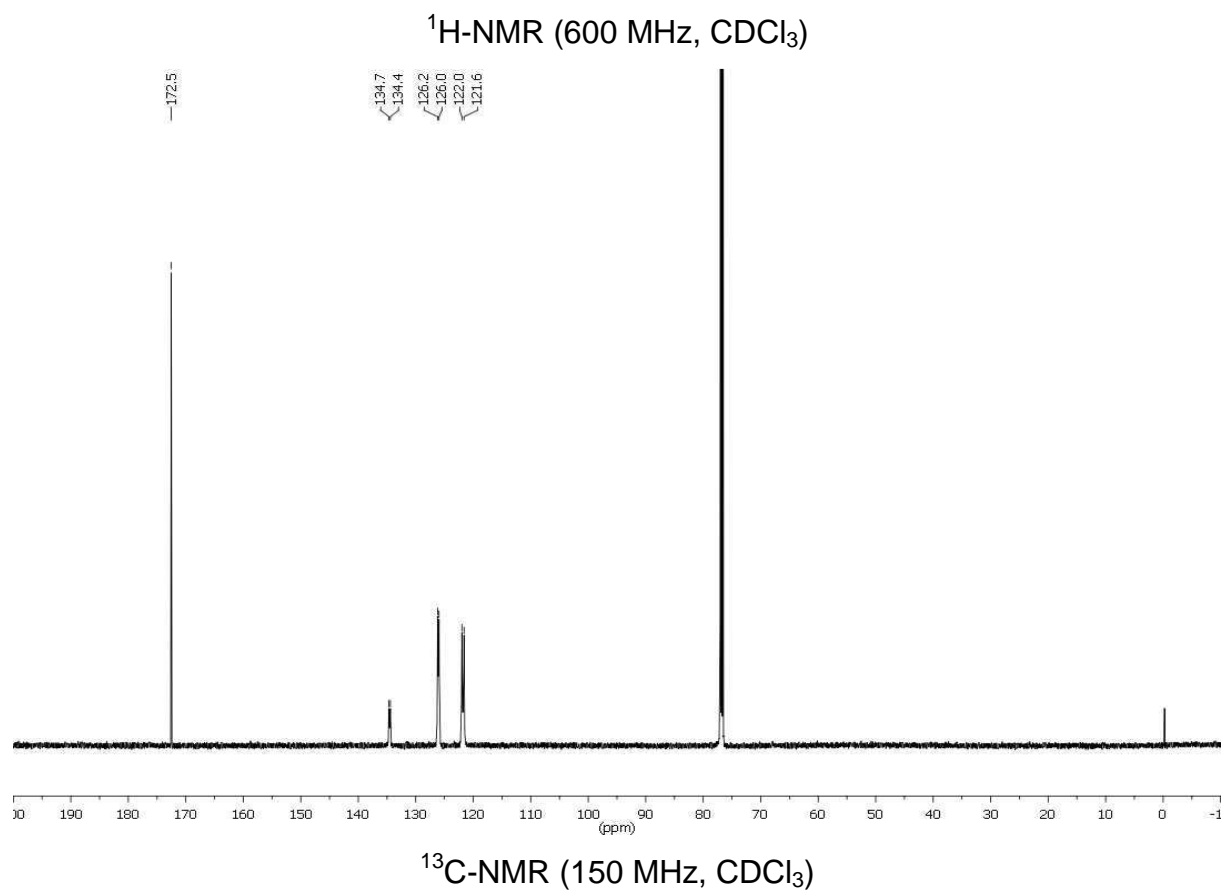

### 5-methylbenzo[d][1,3]dithiol-2-imine (1b)

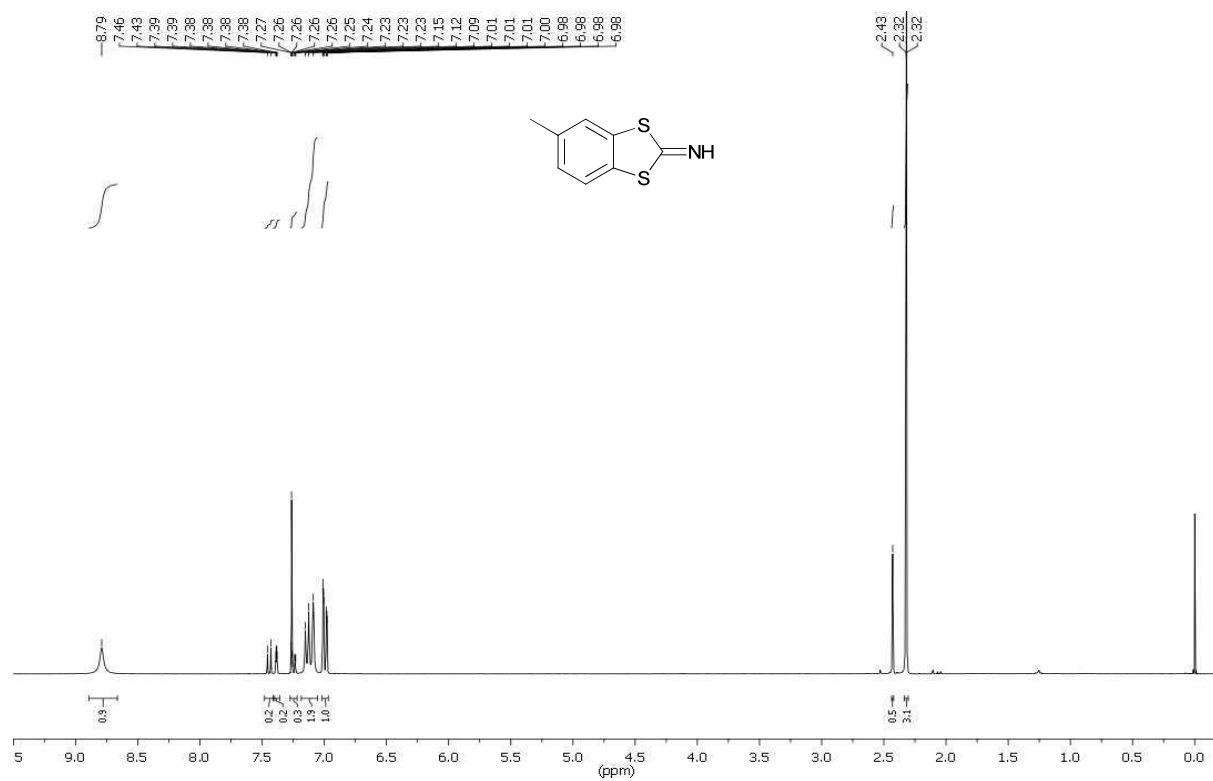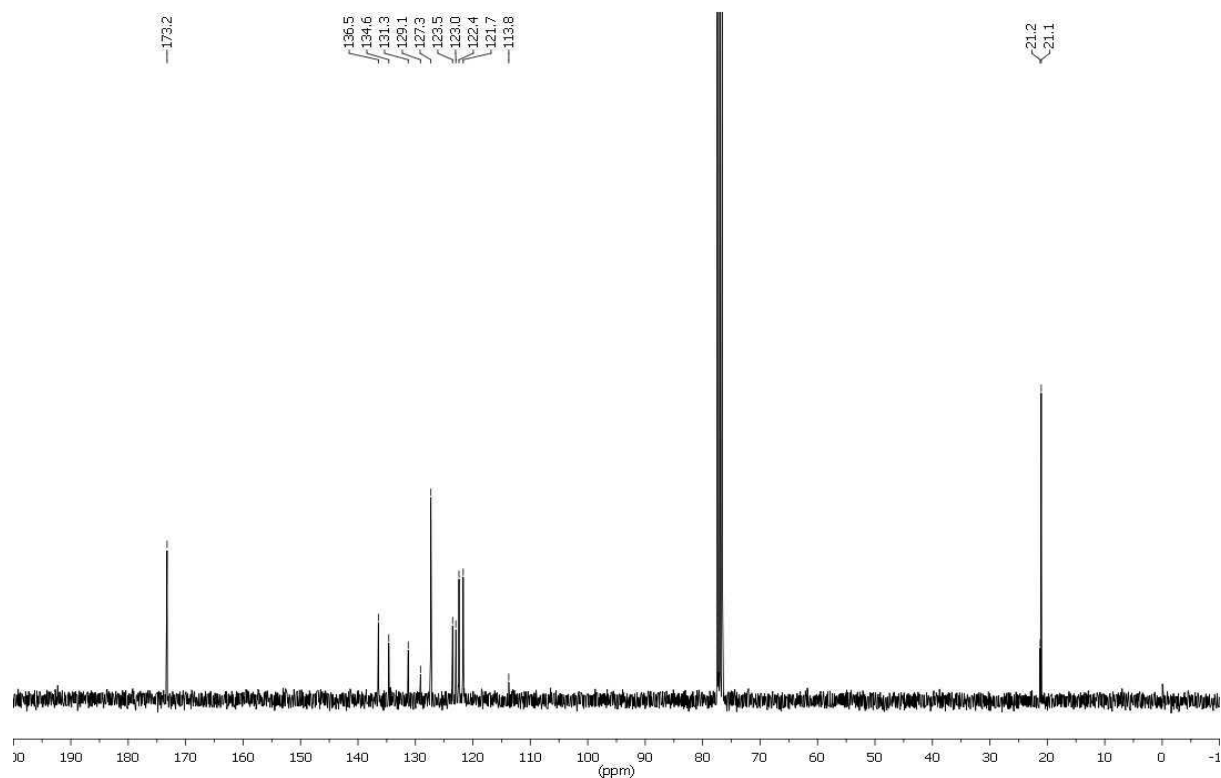

# 6,7-Diphenyl-[1,3]dithiolo[4,5-g]quinoxalin-2-imine (1c)

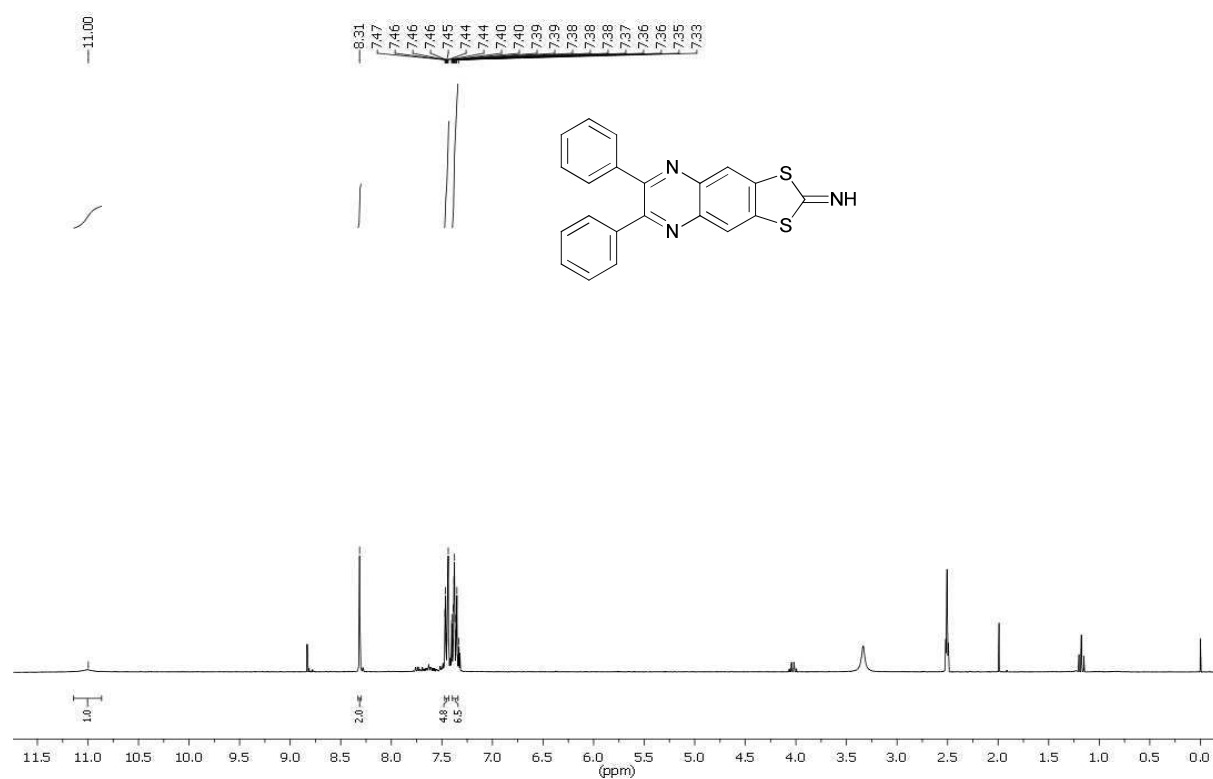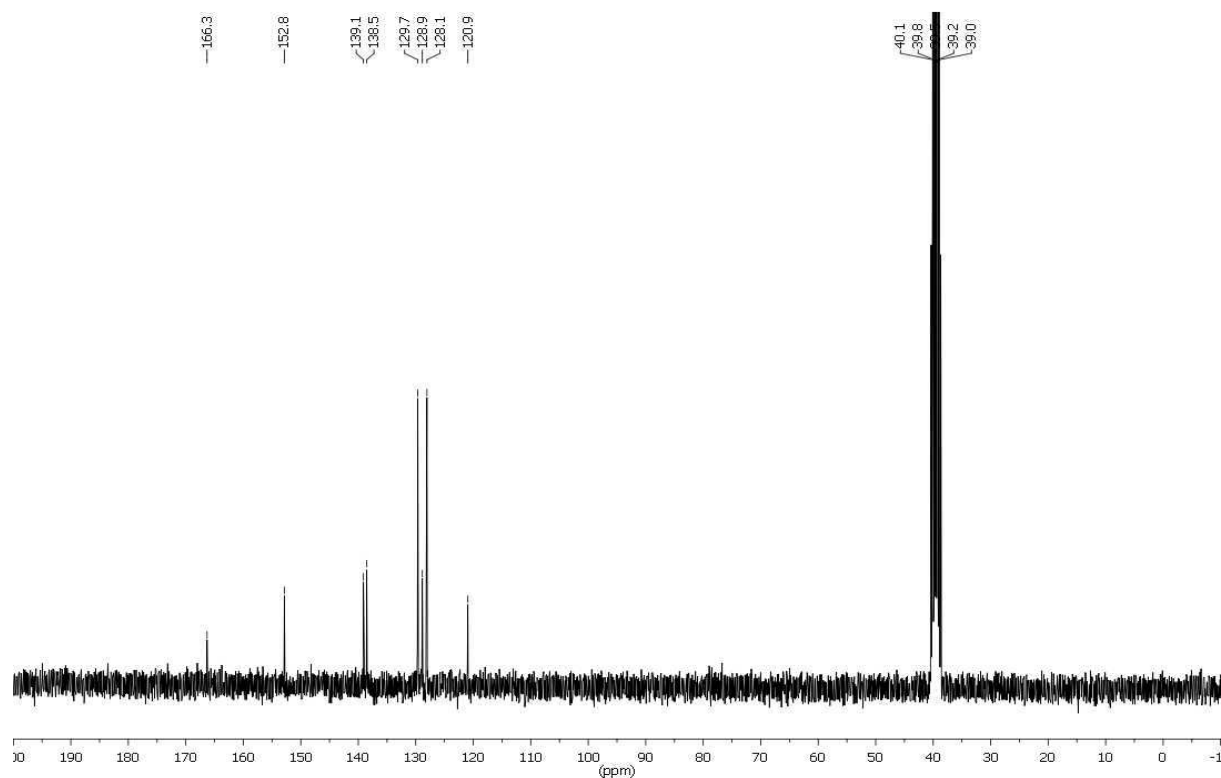

## 2-Ethyl-5-thiocyanato-1H-pyrrole (8b)

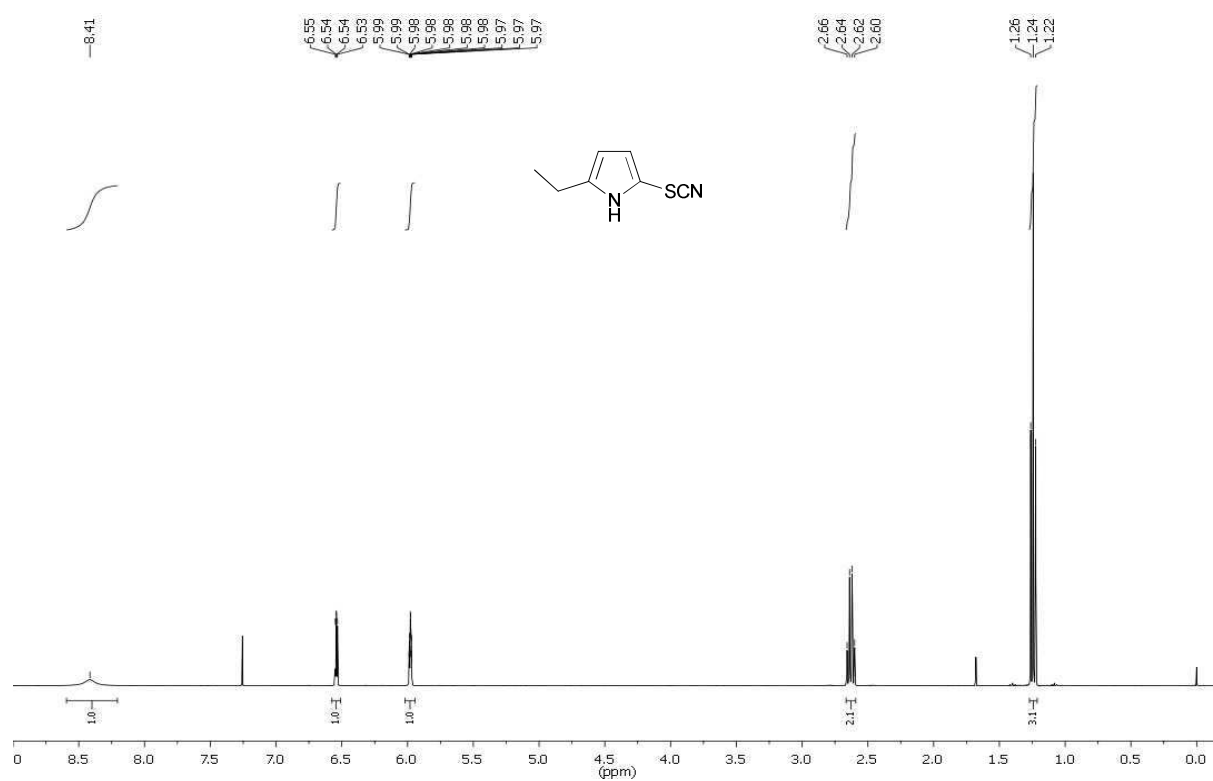

<sup>1</sup>H-NMR (400 MHz, CDCl<sub>3</sub>)

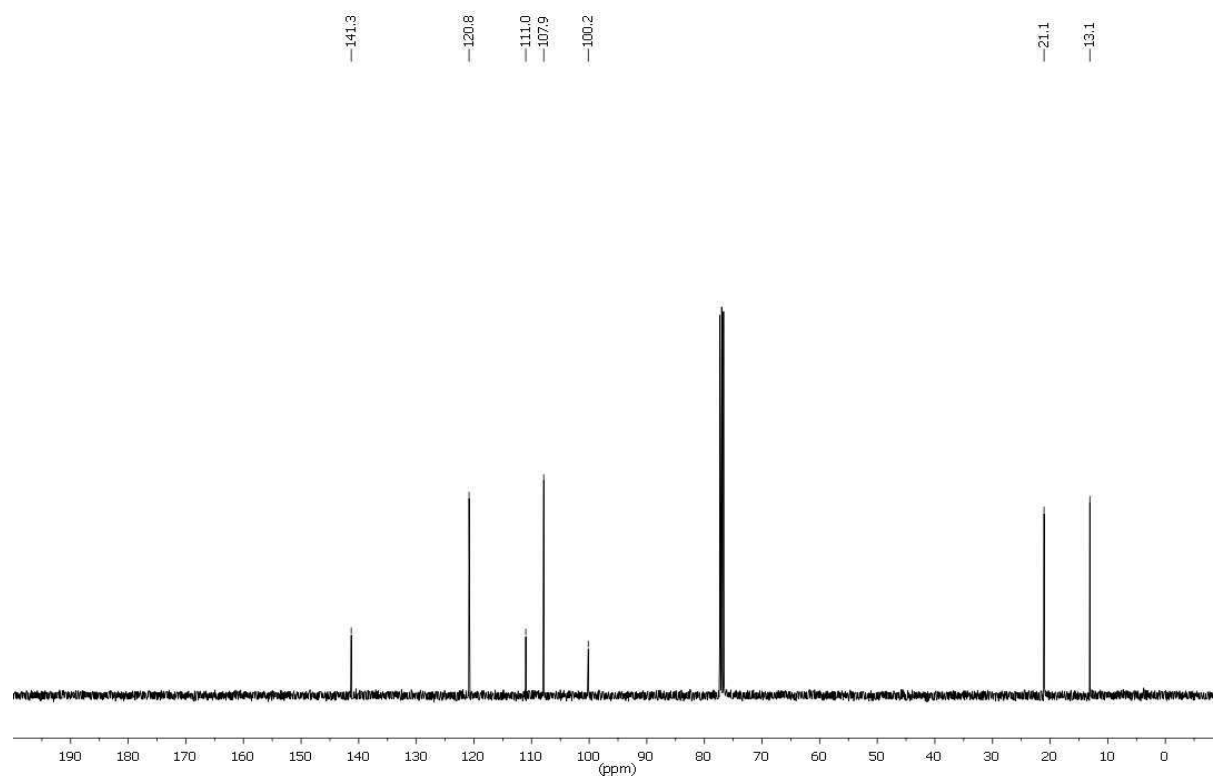

<sup>13</sup>C-NMR (100 MHz, CDCl<sub>3</sub>)

## 2-Methylthianthrene (3ab)

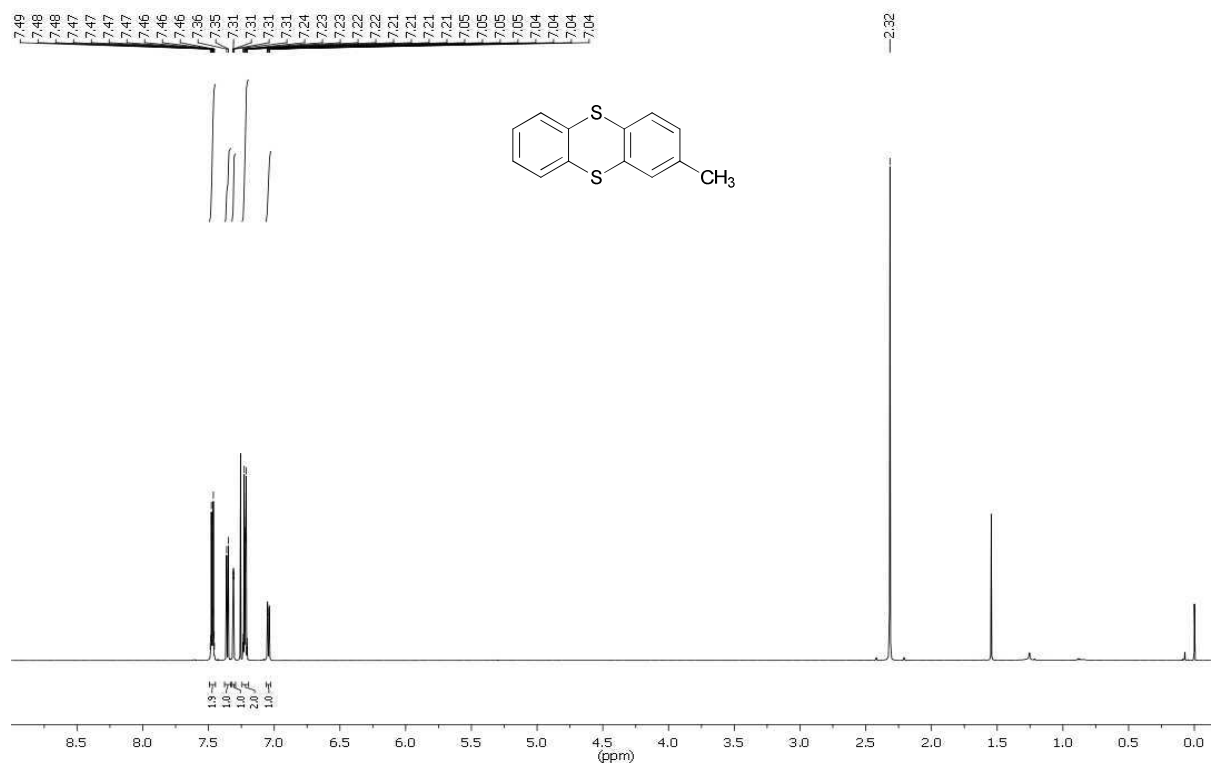

## <sup>1</sup>H-NMR (600 MHz, CDCl<sub>3</sub>)

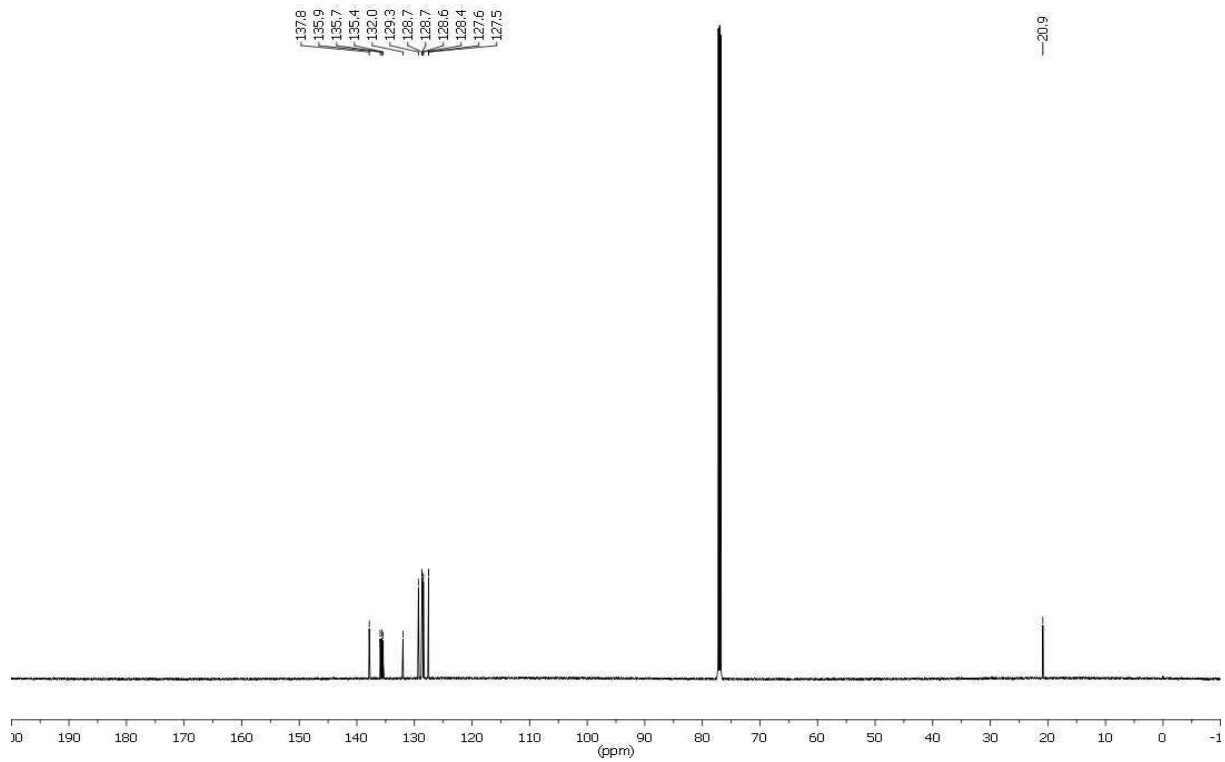

## <sup>13</sup>C-NMR (150 MHz, CDCl<sub>3</sub>)



# 1-Methylthianthrene (3ac)

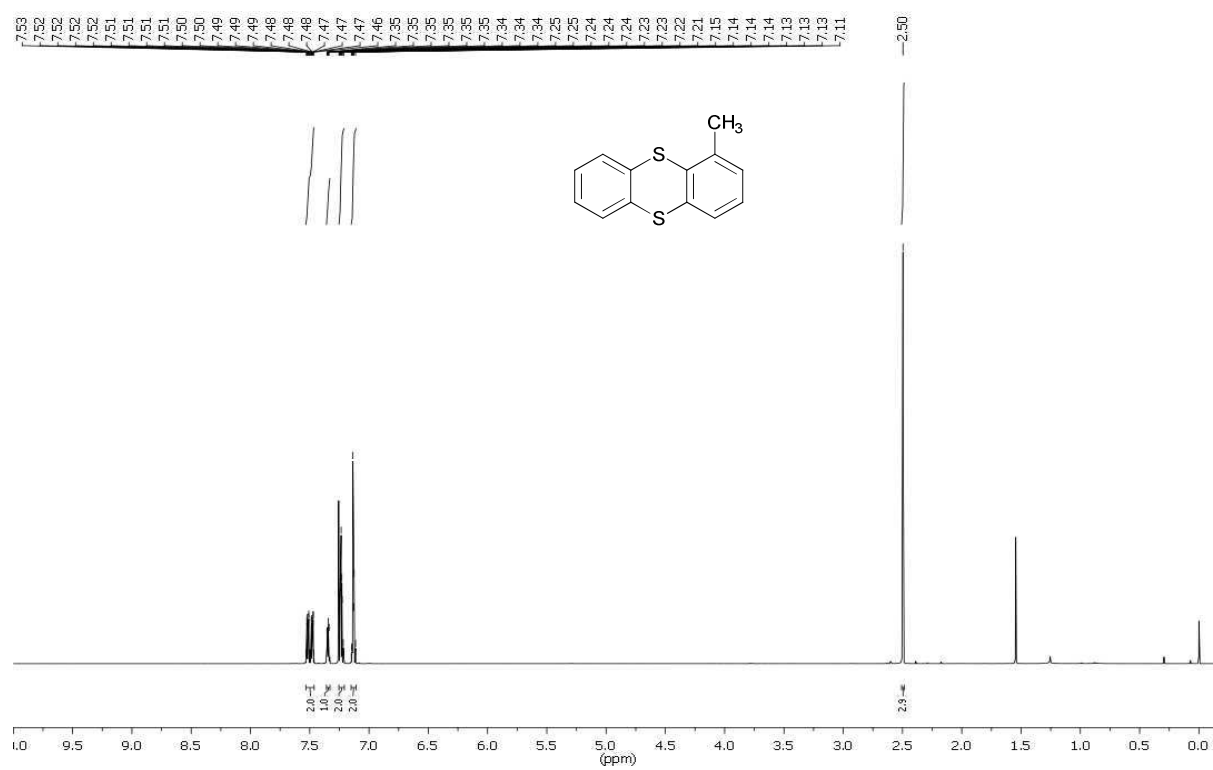

## <sup>1</sup>H-NMR (600 MHz, CDCl<sub>3</sub>)

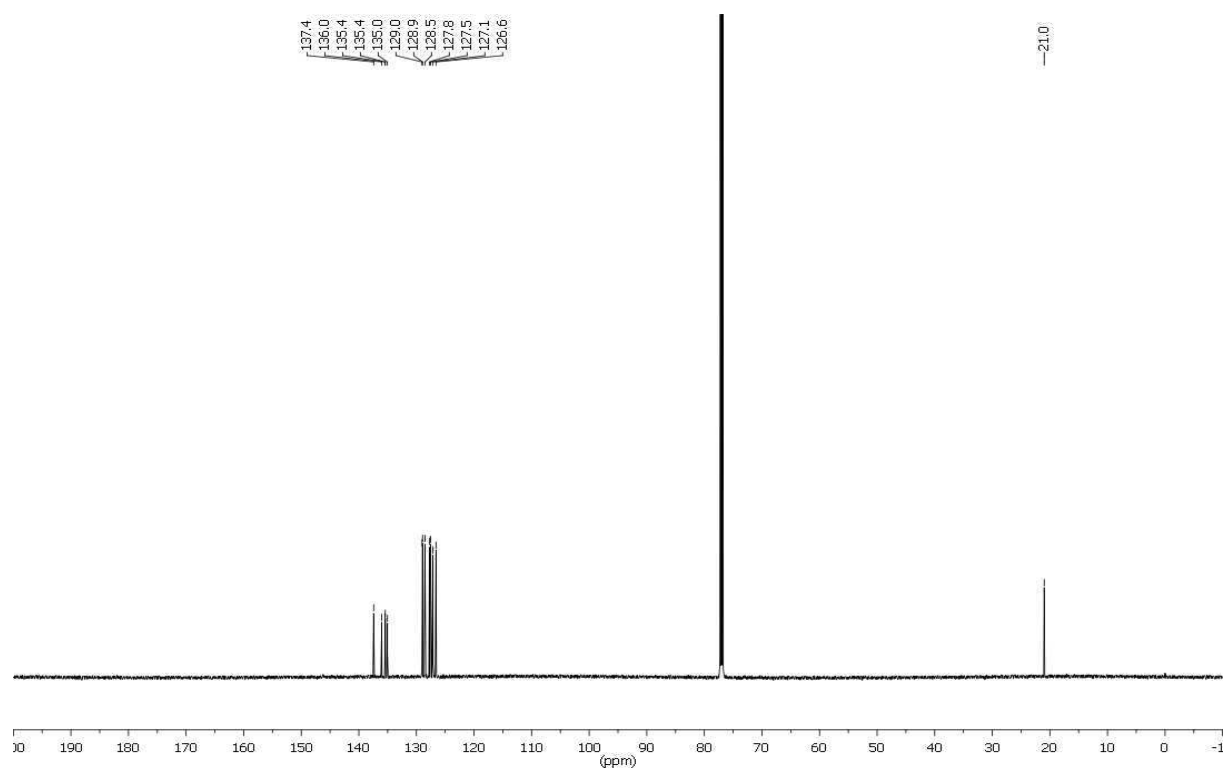

## <sup>13</sup>C-NMR (150 MHz, CDCl<sub>3</sub>)

## 2,3-Dihydro-1*H*-cyclopenta[*b*]thianthrene (3ad)

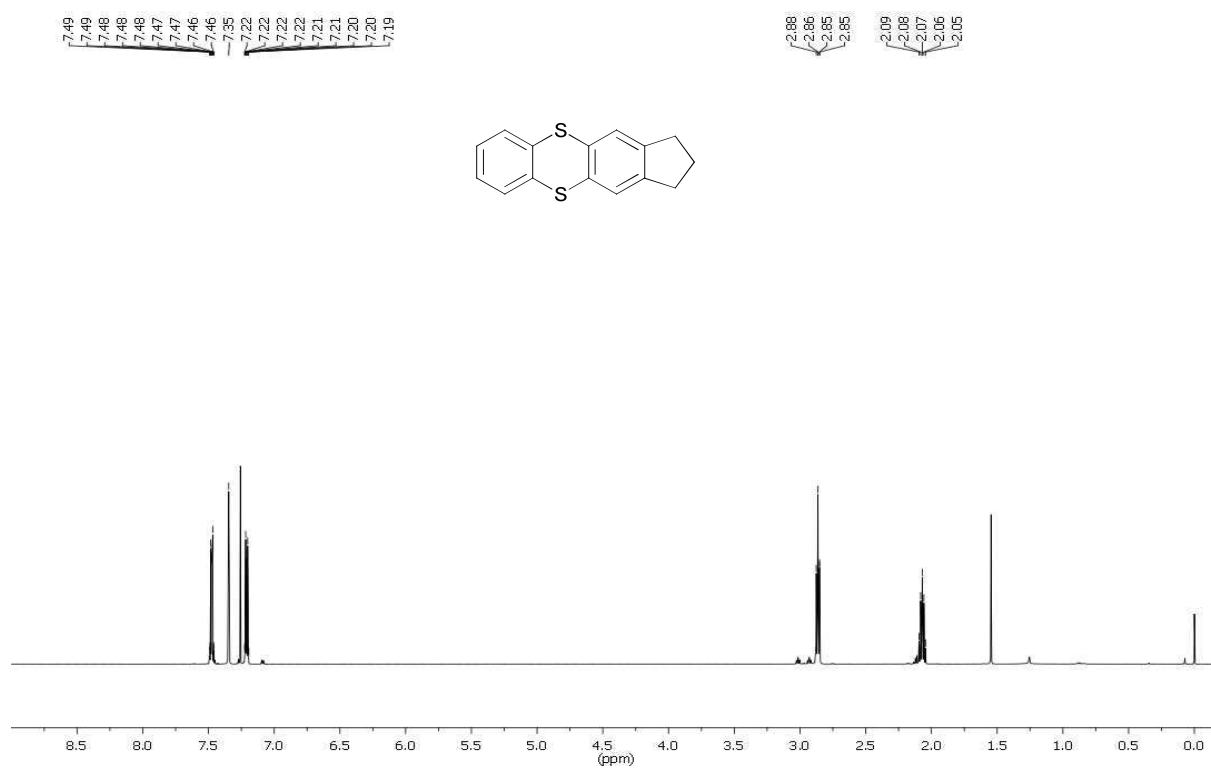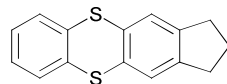

<sup>1</sup>H-NMR (600 MHz, CDCl<sub>3</sub>)

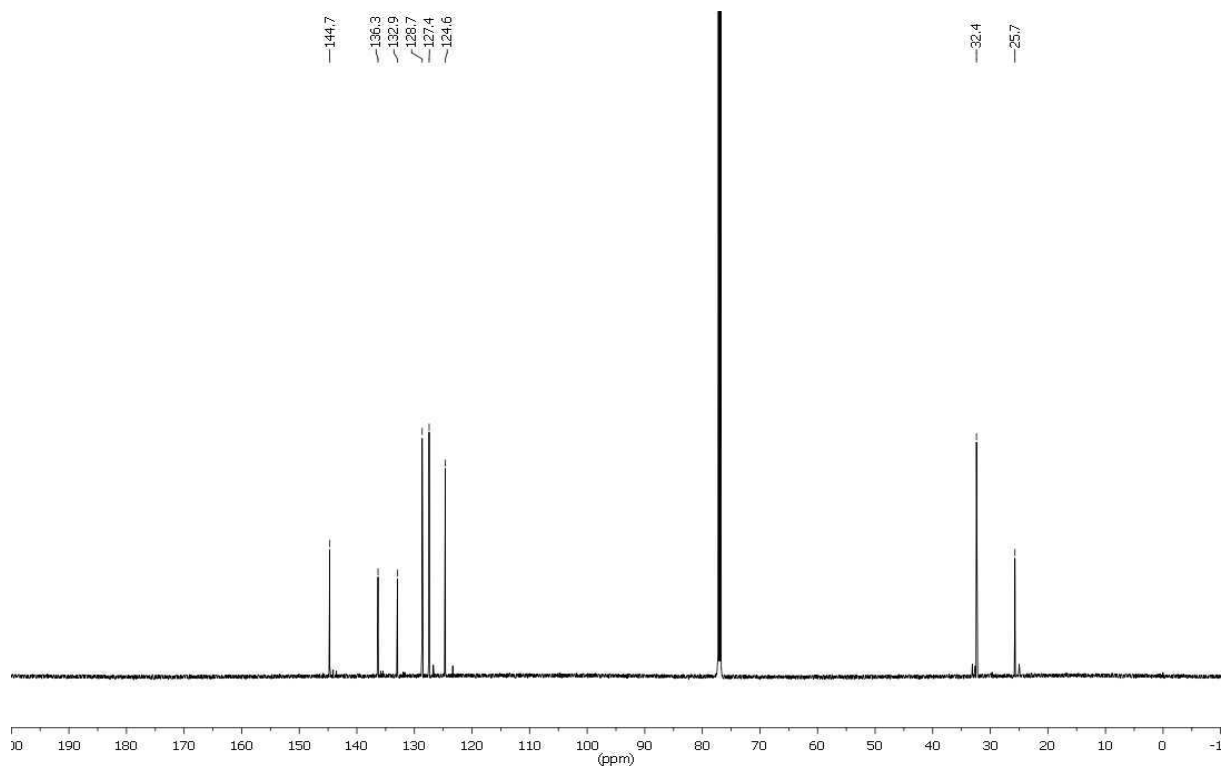

<sup>13</sup>C-NMR (150 MHz, CDCl<sub>3</sub>)

# Benzo[b]thianthrene (3ae)

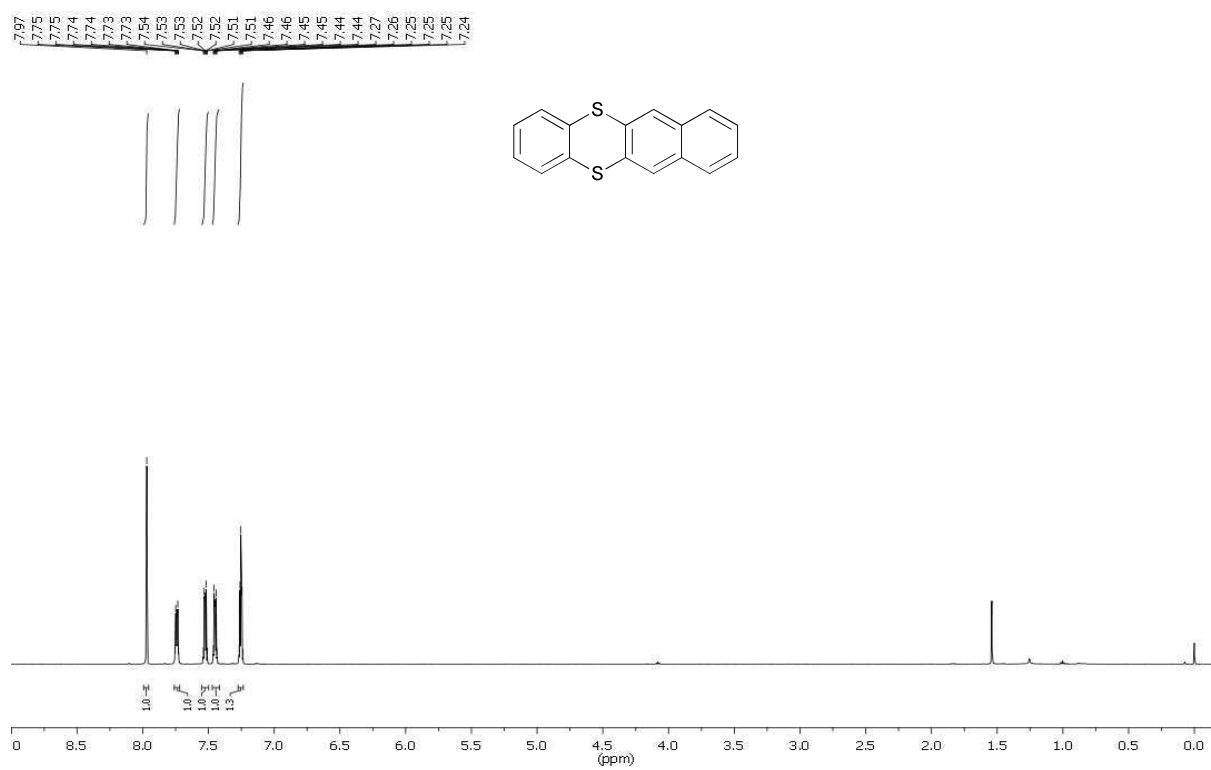

<sup>1</sup>H-NMR (600 MHz, CDCl<sub>3</sub>)

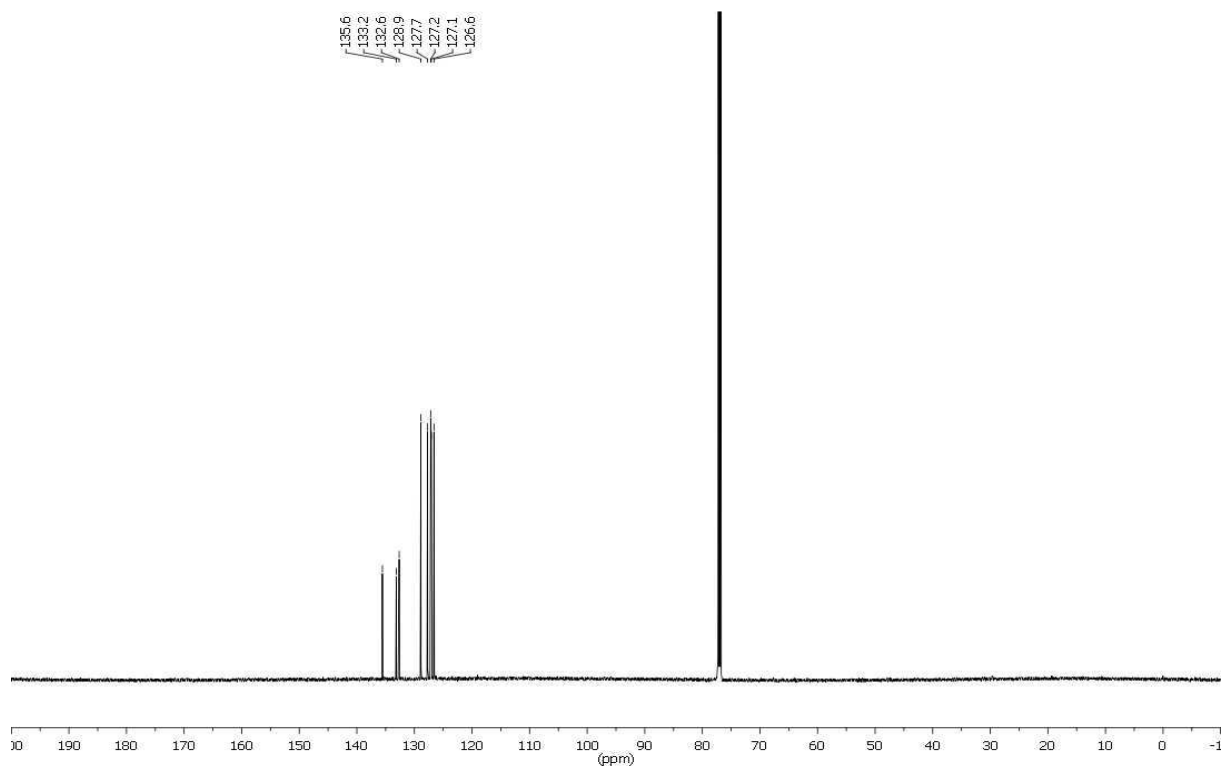

<sup>13</sup>C-NMR (150 MHz, CDCl<sub>3</sub>)

# Benzo[a]thianthrene (3af)

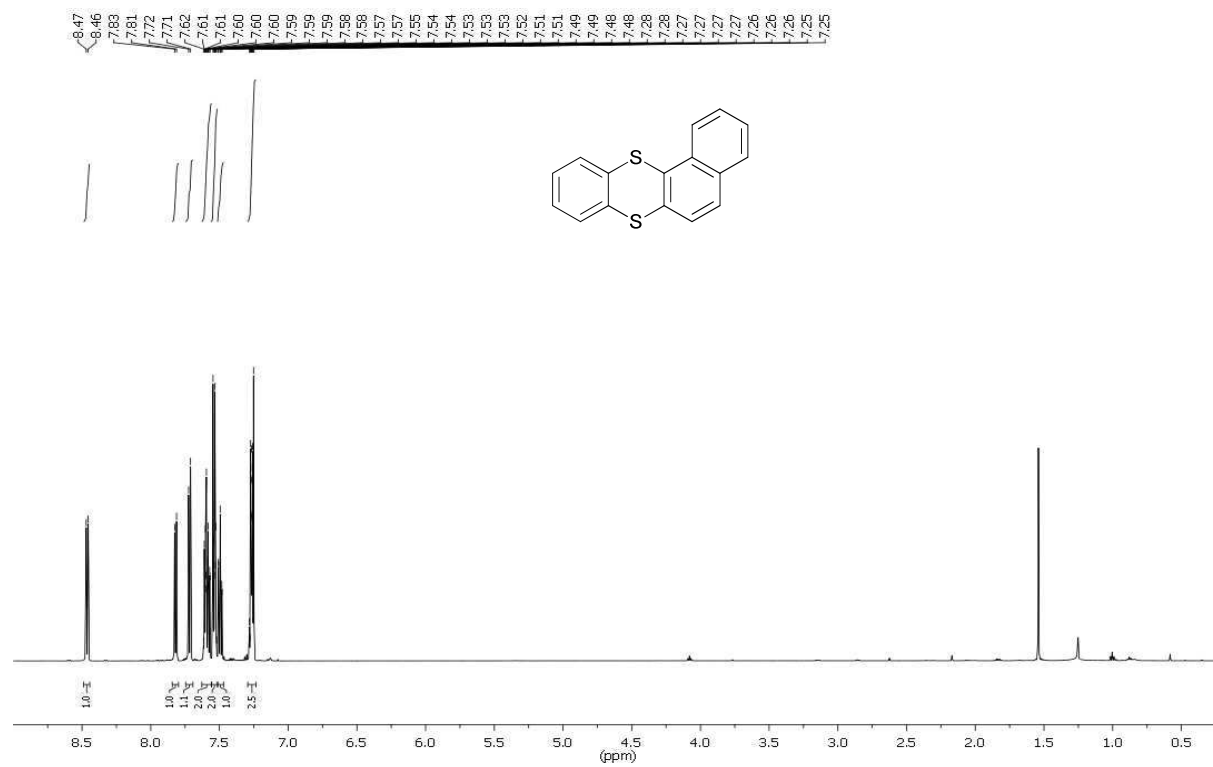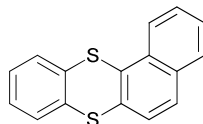

## <sup>1</sup>H-NMR (600 MHz, CDCl<sub>3</sub>)

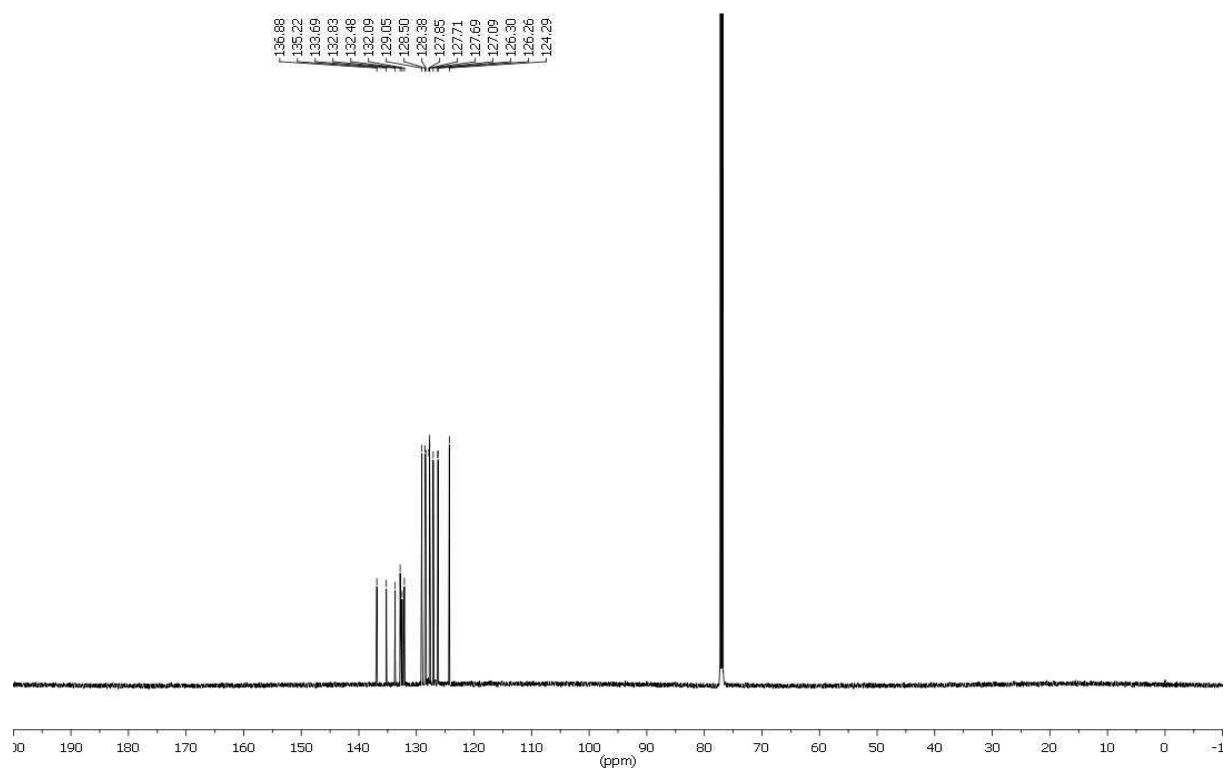

## <sup>13</sup>C-NMR (150 MHz, CDCl<sub>3</sub>)

## 2-Chlorothianthrene (3ag)

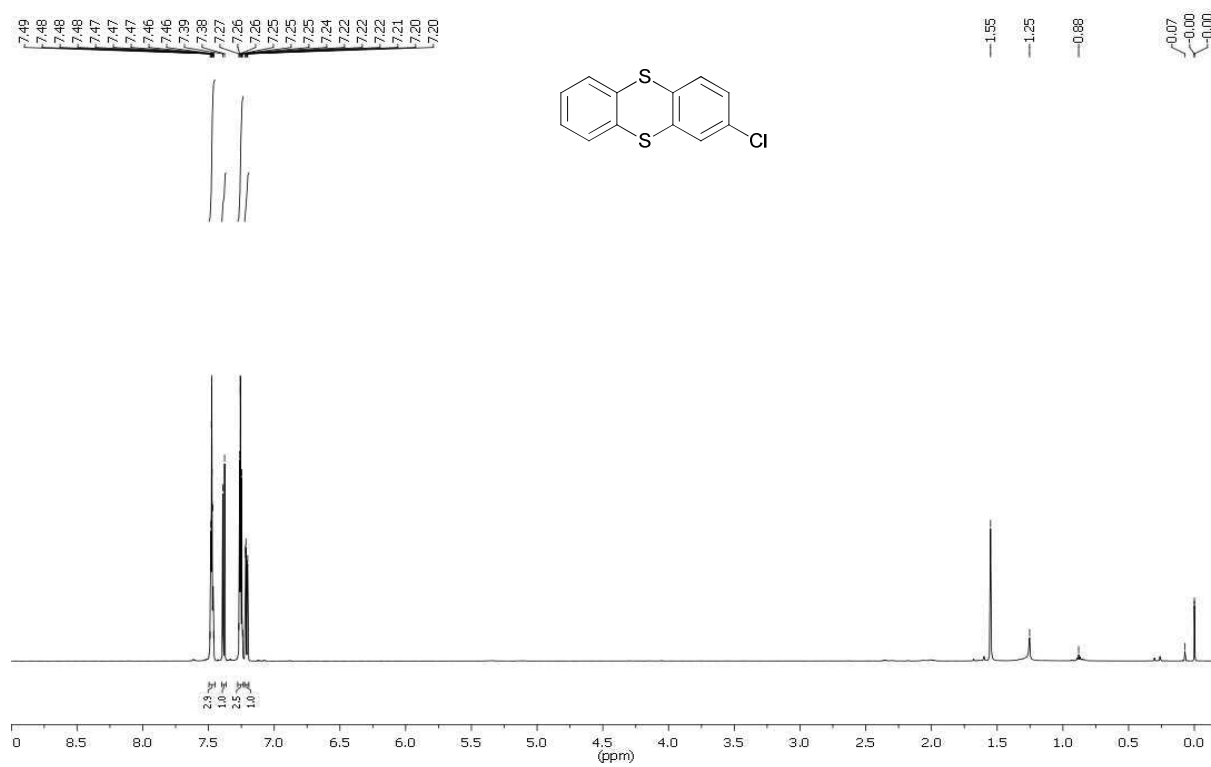

## <sup>1</sup>H-NMR (600 MHz, CDCl<sub>3</sub>)

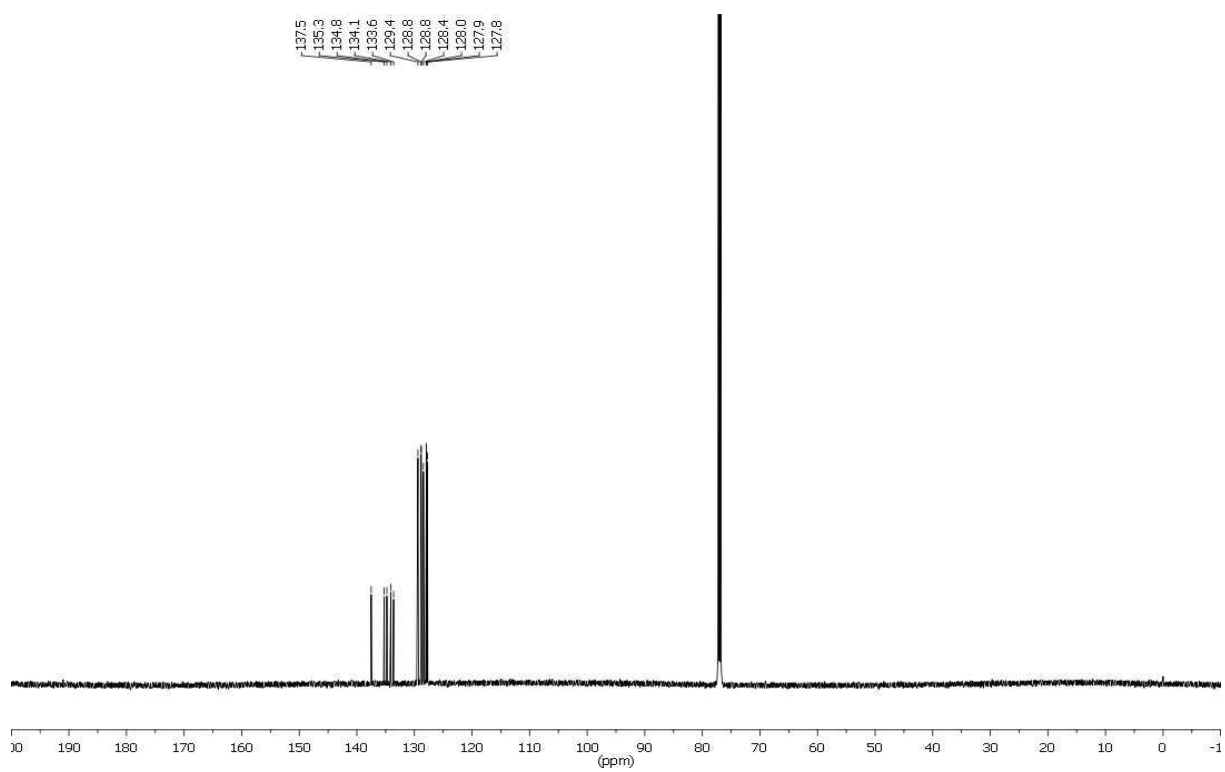

## <sup>13</sup>C-NMR (150 MHz, CDCl<sub>3</sub>)

## 2,3-Difluorothianthrene (3ah)

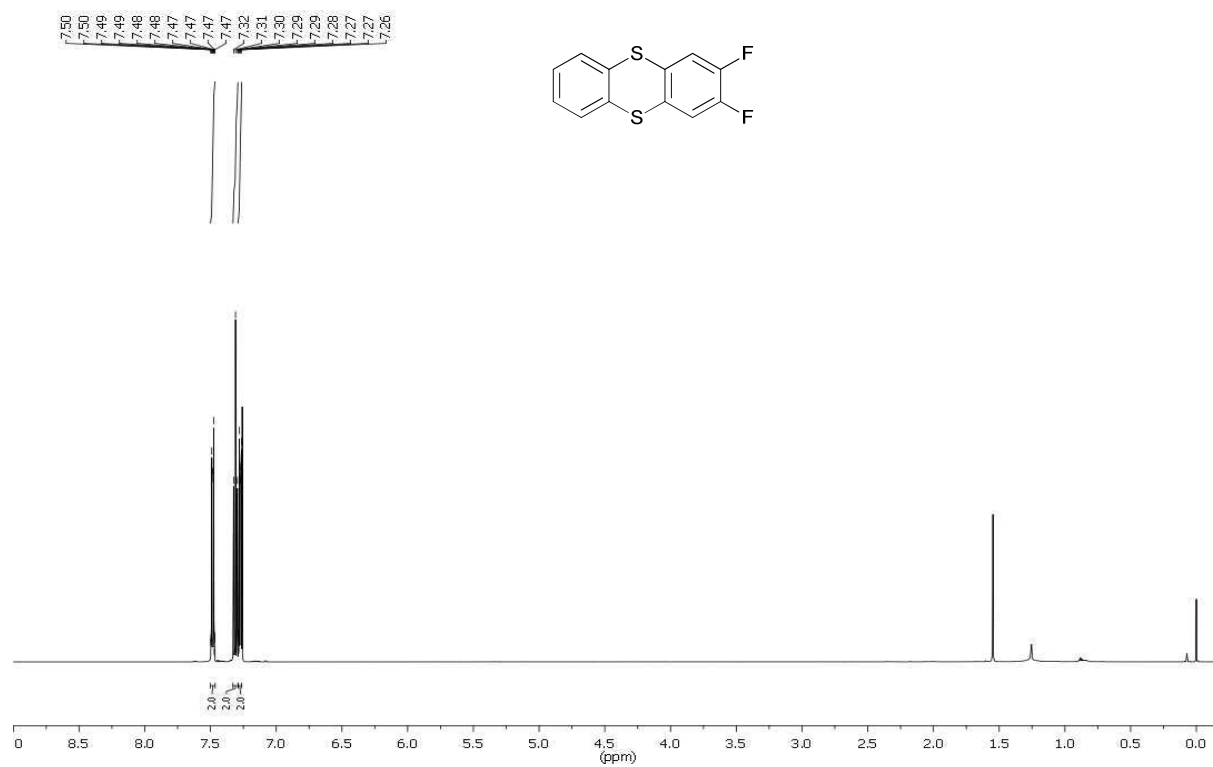

## <sup>1</sup>H-NMR (600 MHz, CDCl<sub>3</sub>)

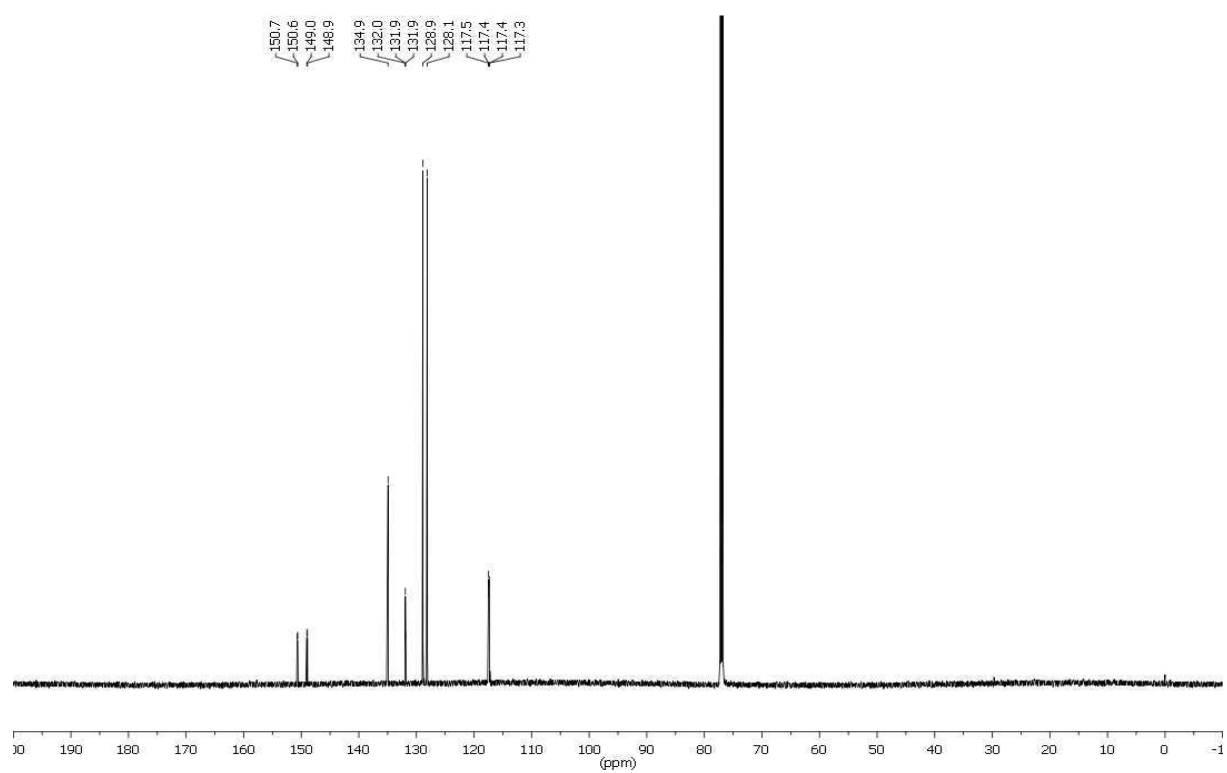

## <sup>13</sup>C-NMR (150 MHz, CDCl<sub>3</sub>)

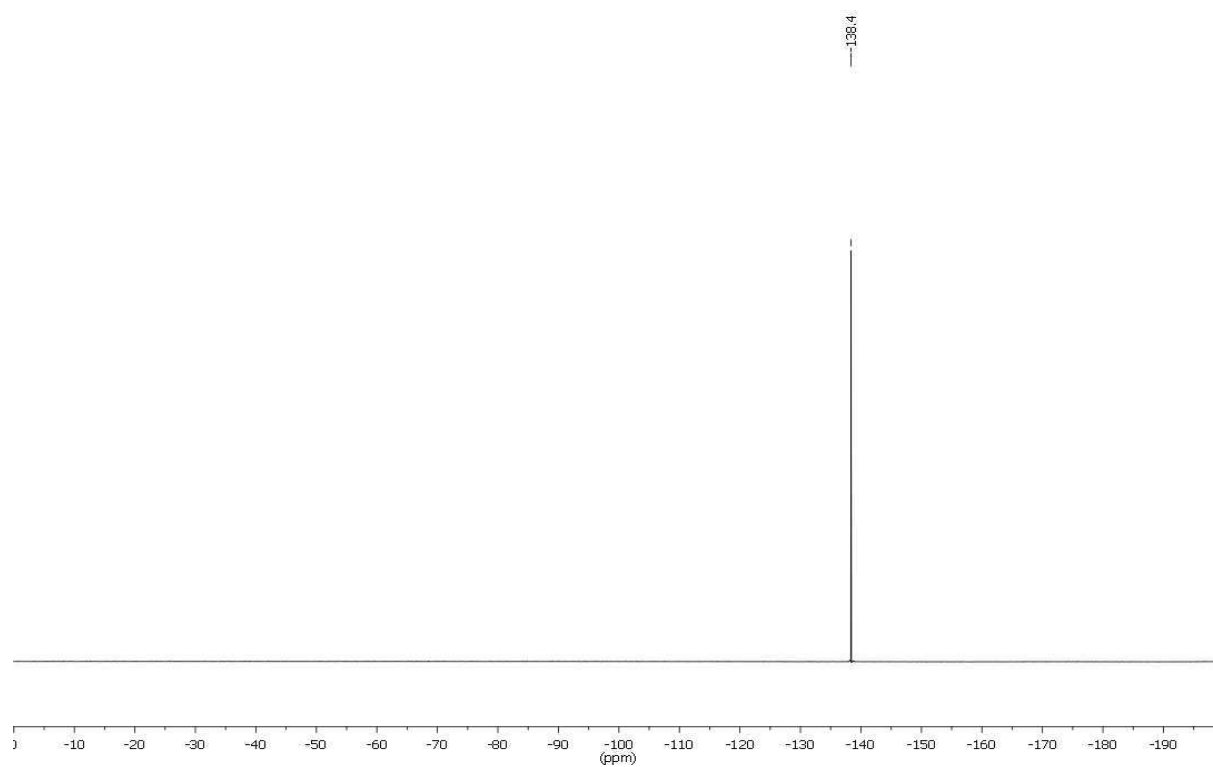

$^{19}\text{F}$ -NMR (376 MHz,  $\text{CDCl}_3$ )

### 1,3-Dibromothianthrene (3ai)

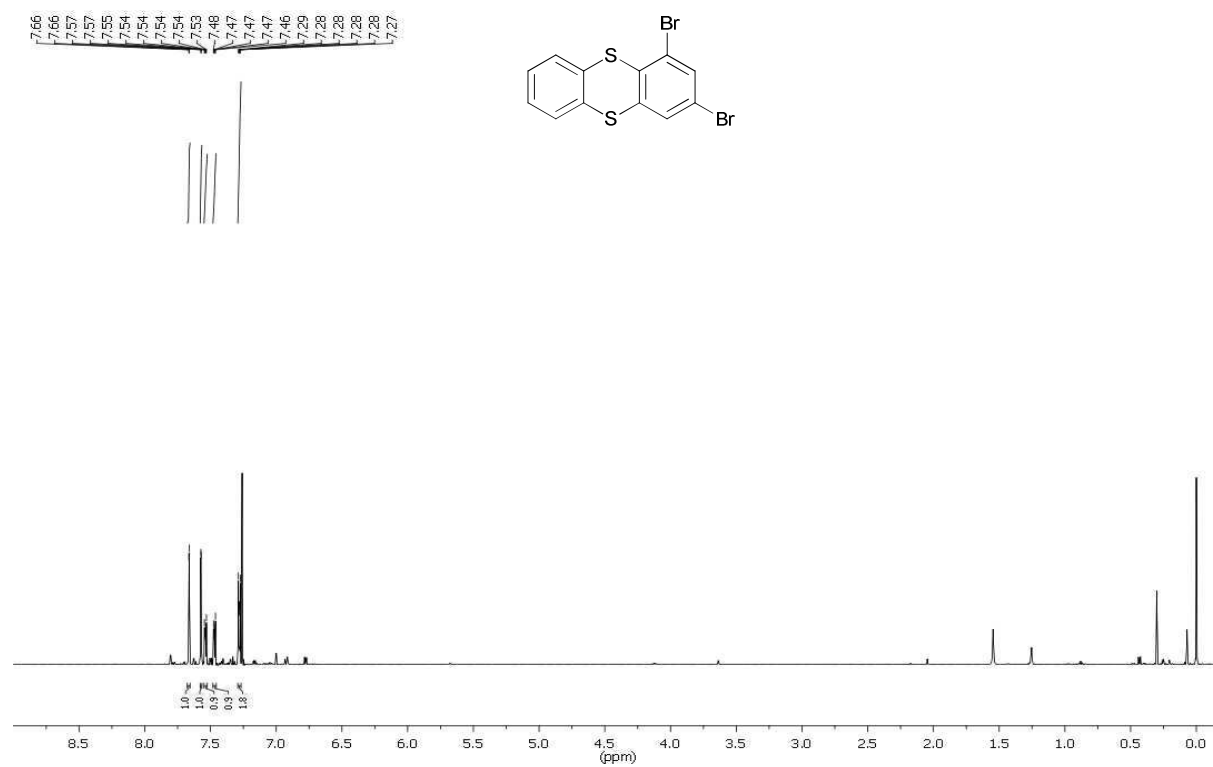

### <sup>1</sup>H-NMR (600 MHz, CDCl<sub>3</sub>)

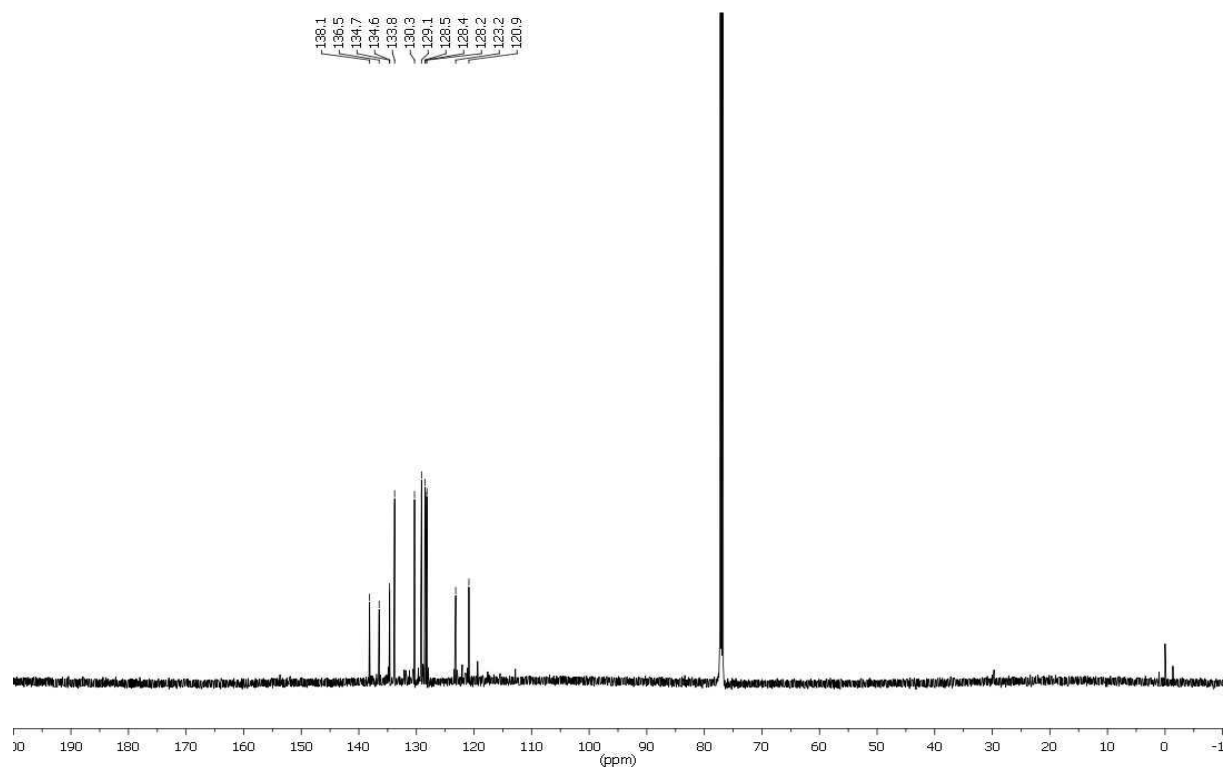

### <sup>13</sup>C-NMR (150 MHz, CDCl<sub>3</sub>)



# 1-Methoxythianthrene (3aj)

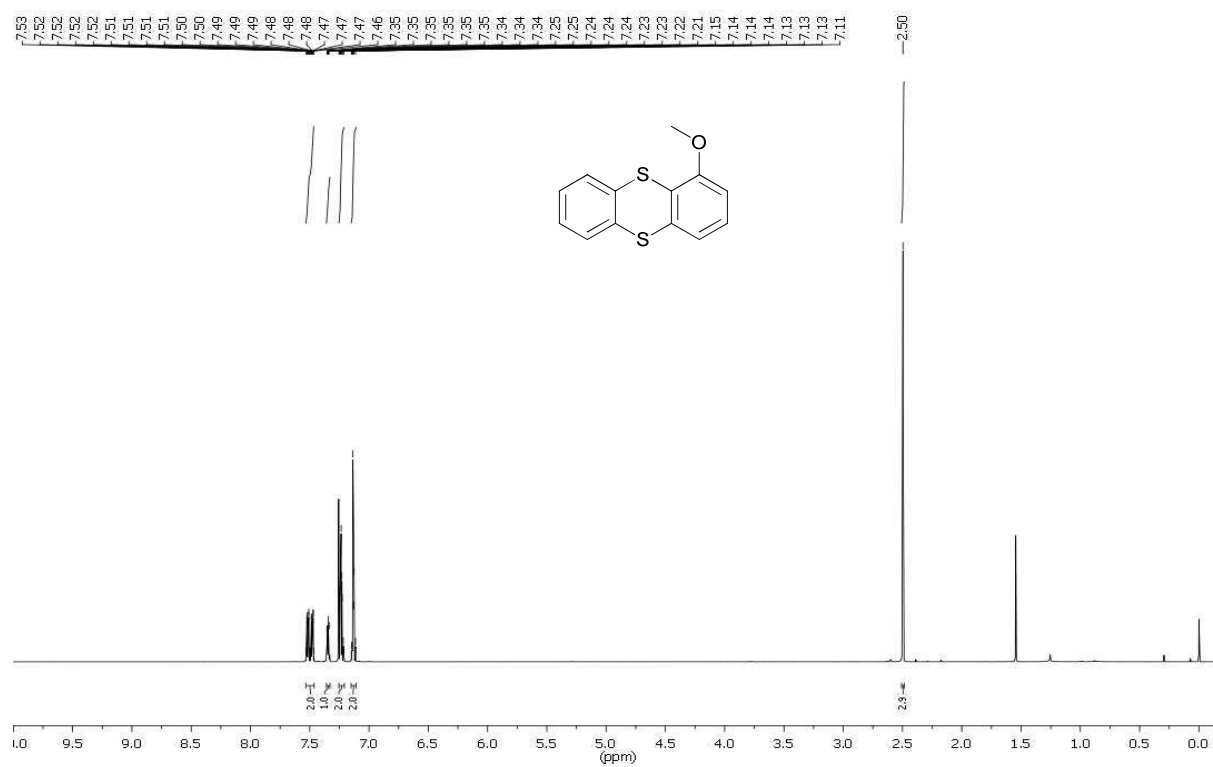

<sup>1</sup>H-NMR (600 MHz, CDCl<sub>3</sub>)

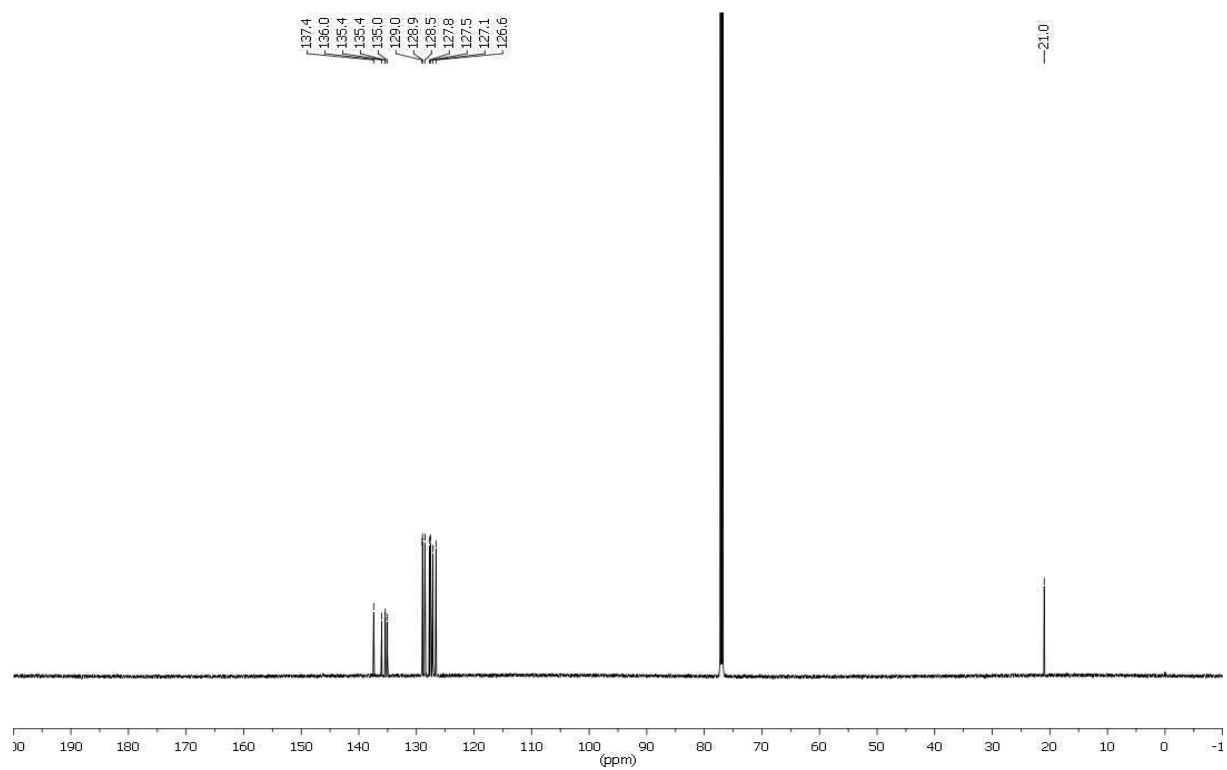

<sup>13</sup>C-NMR (150 MHz, CDCl<sub>3</sub>)

### 2,3-Dimethoxythianthrene (3ak)

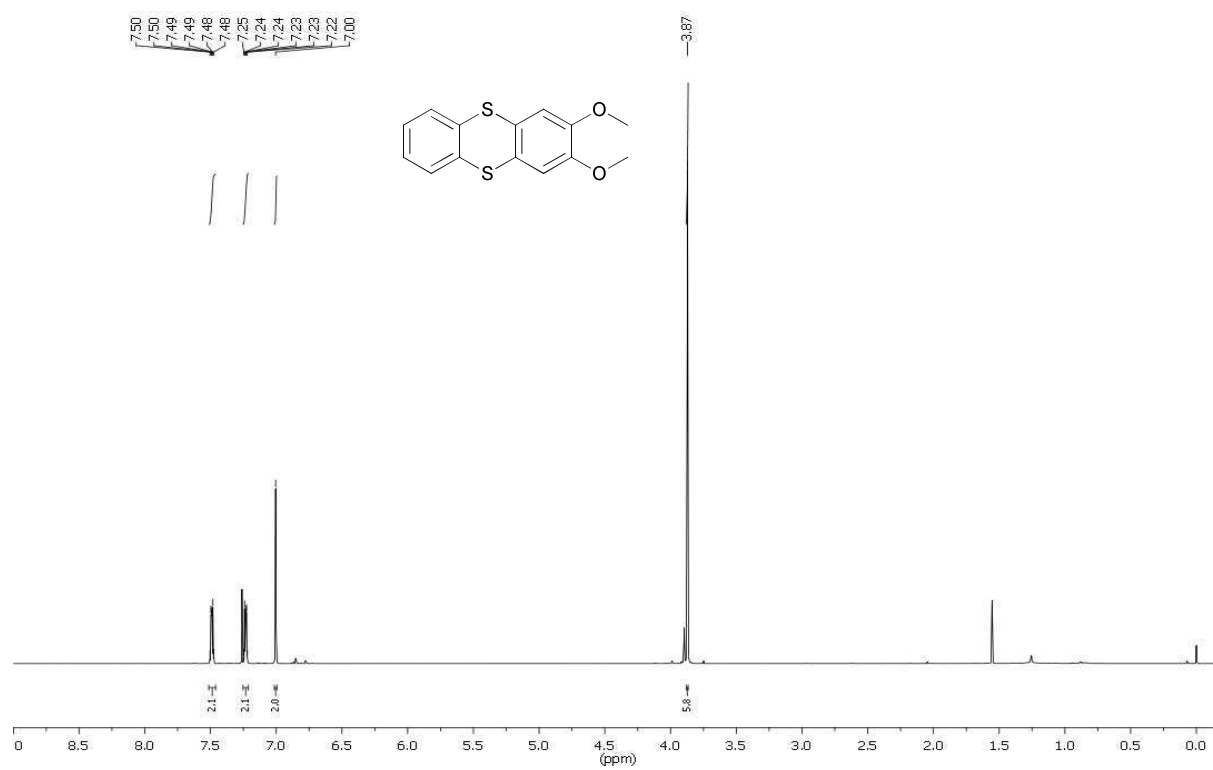

<sup>1</sup>H-NMR (600 MHz, CDCl<sub>3</sub>)

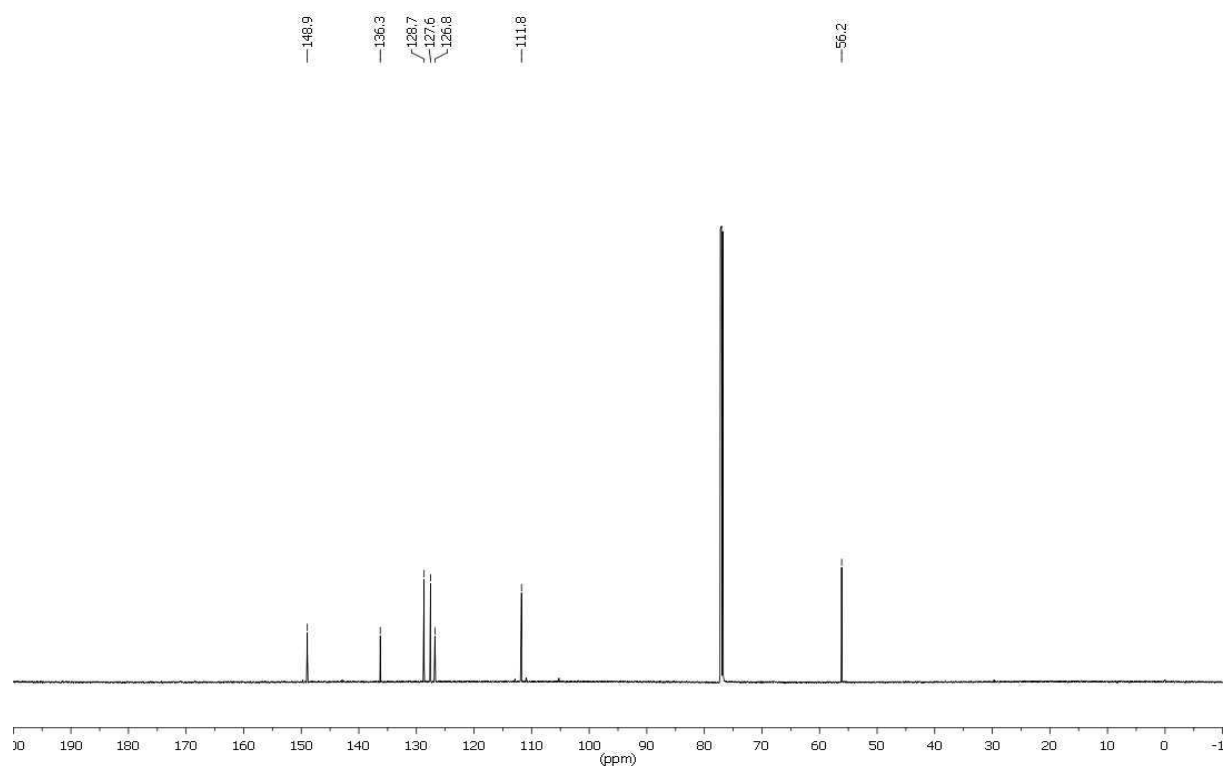

<sup>13</sup>C-NMR (150 MHz, CDCl<sub>3</sub>)

# Benzo[5,6][1,4]dithiino[2,3-c]pyridine (3ai)

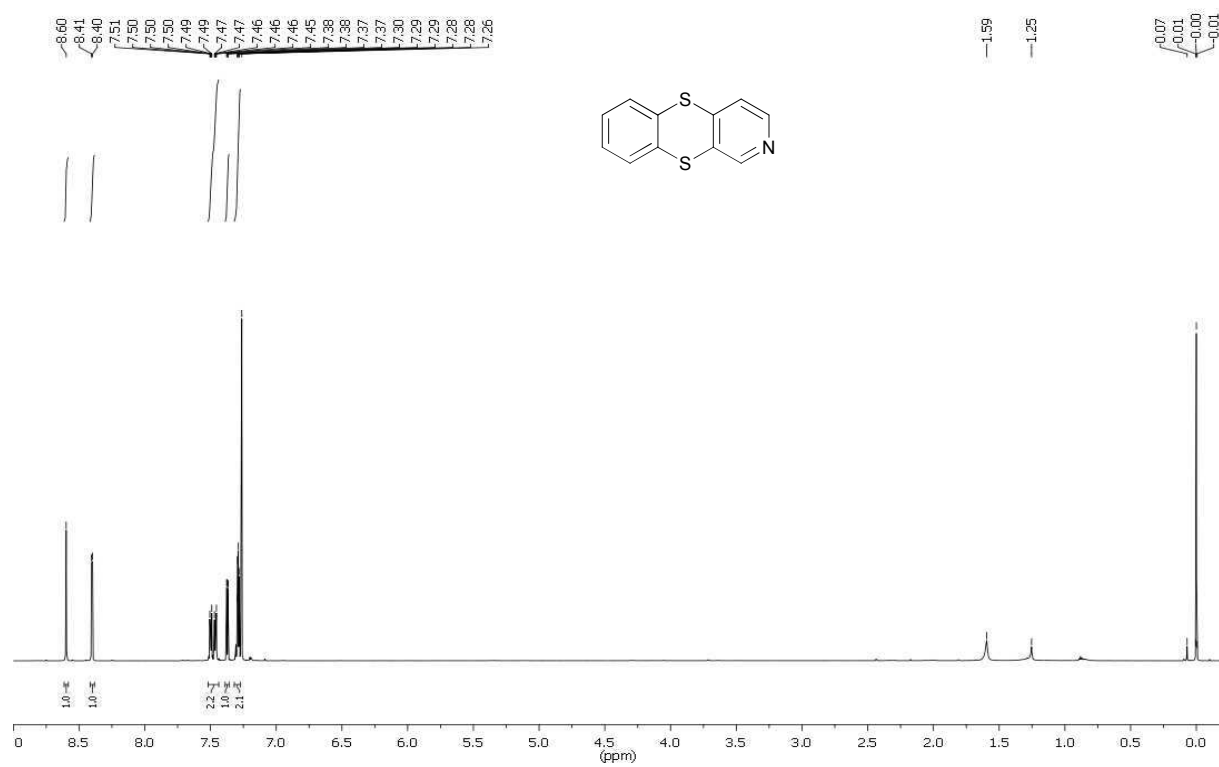

<sup>1</sup>H-NMR (600 MHz, CDCl<sub>3</sub>)

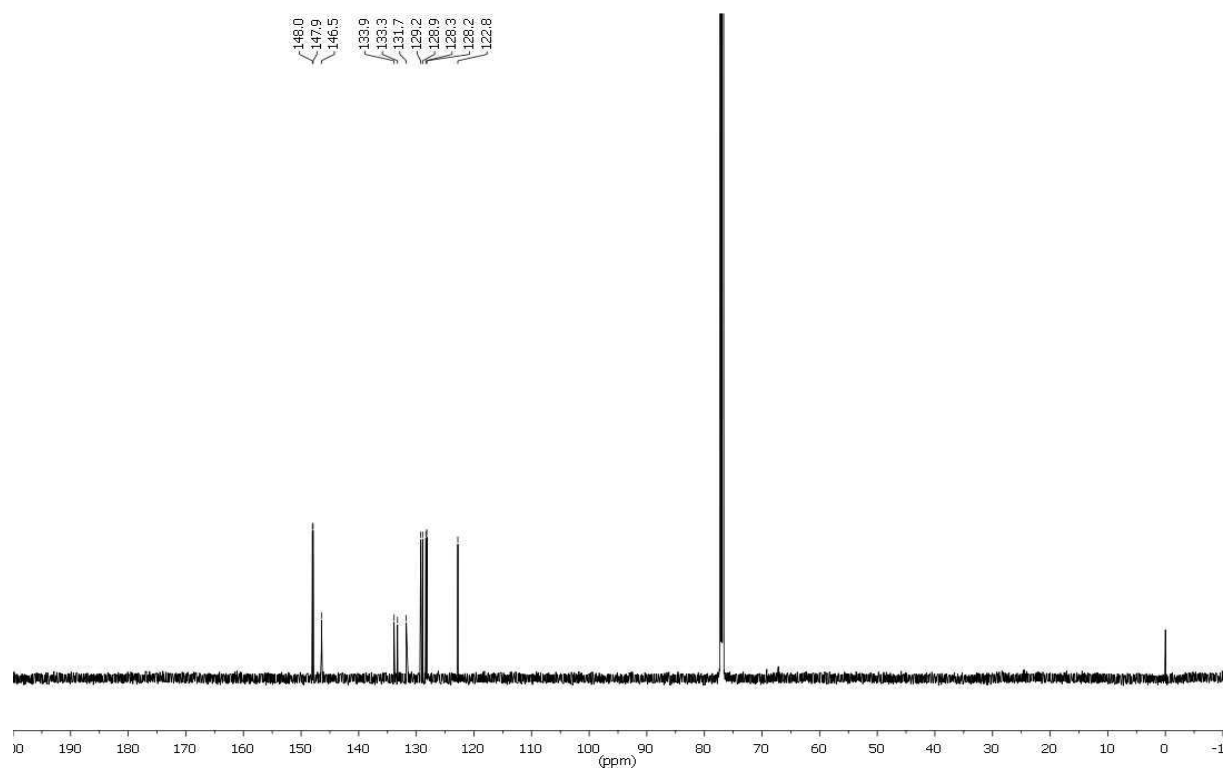

<sup>13</sup>C-NMR (150 MHz, CDCl<sub>3</sub>)

## 2-Methylbenzo[*b*]thianthrene (3be)

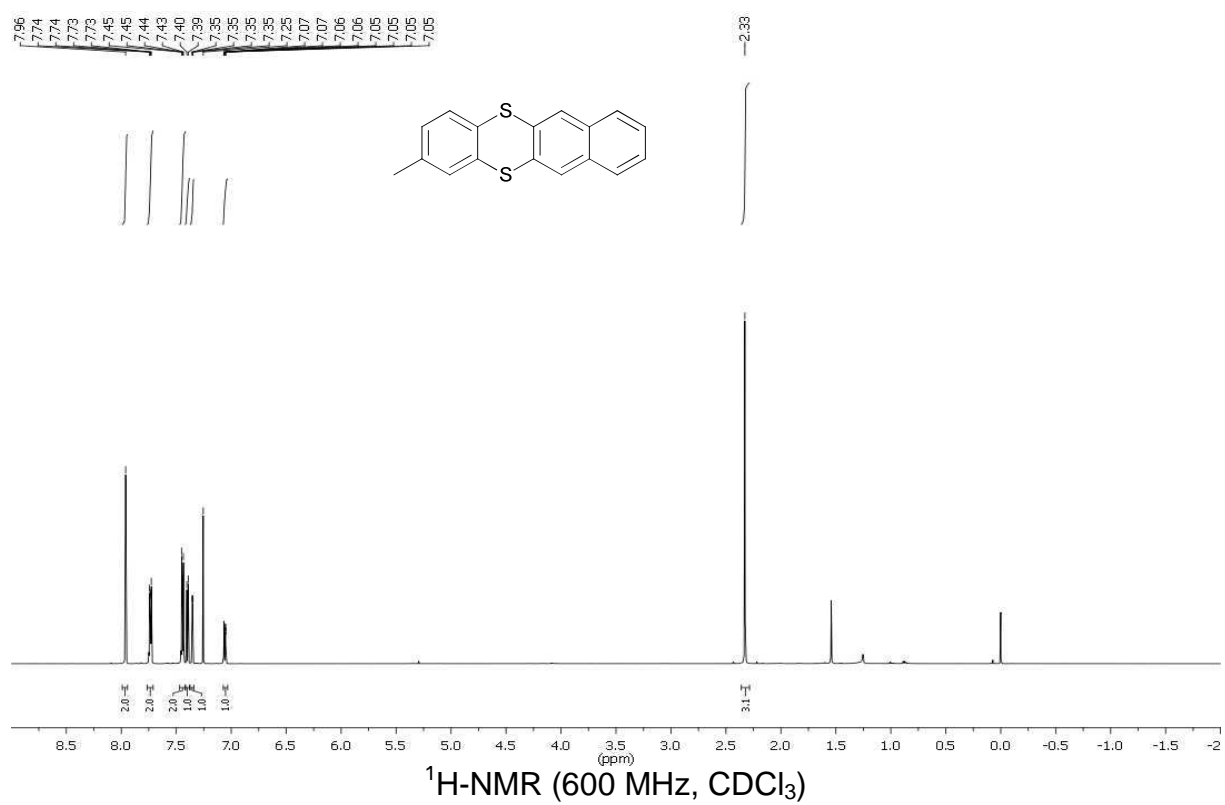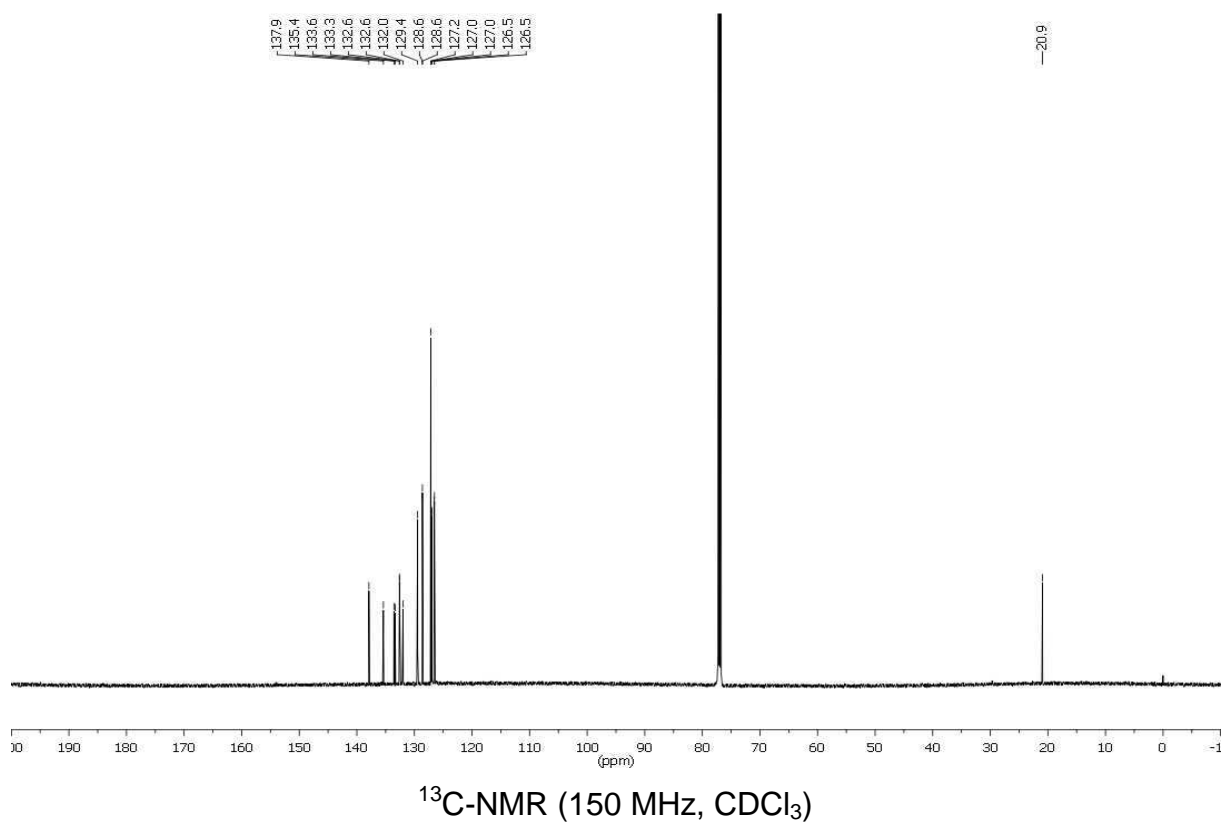

## 2,3-difluoro-7-methylthianthrene (3bh)

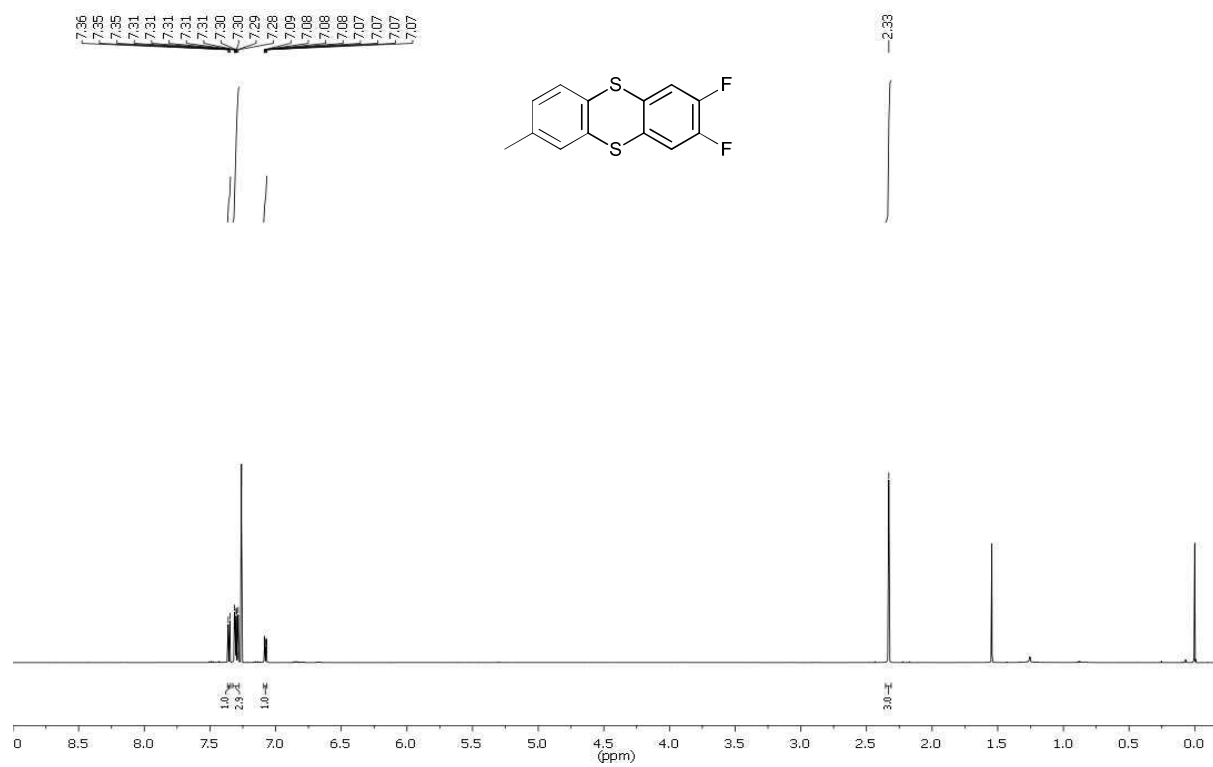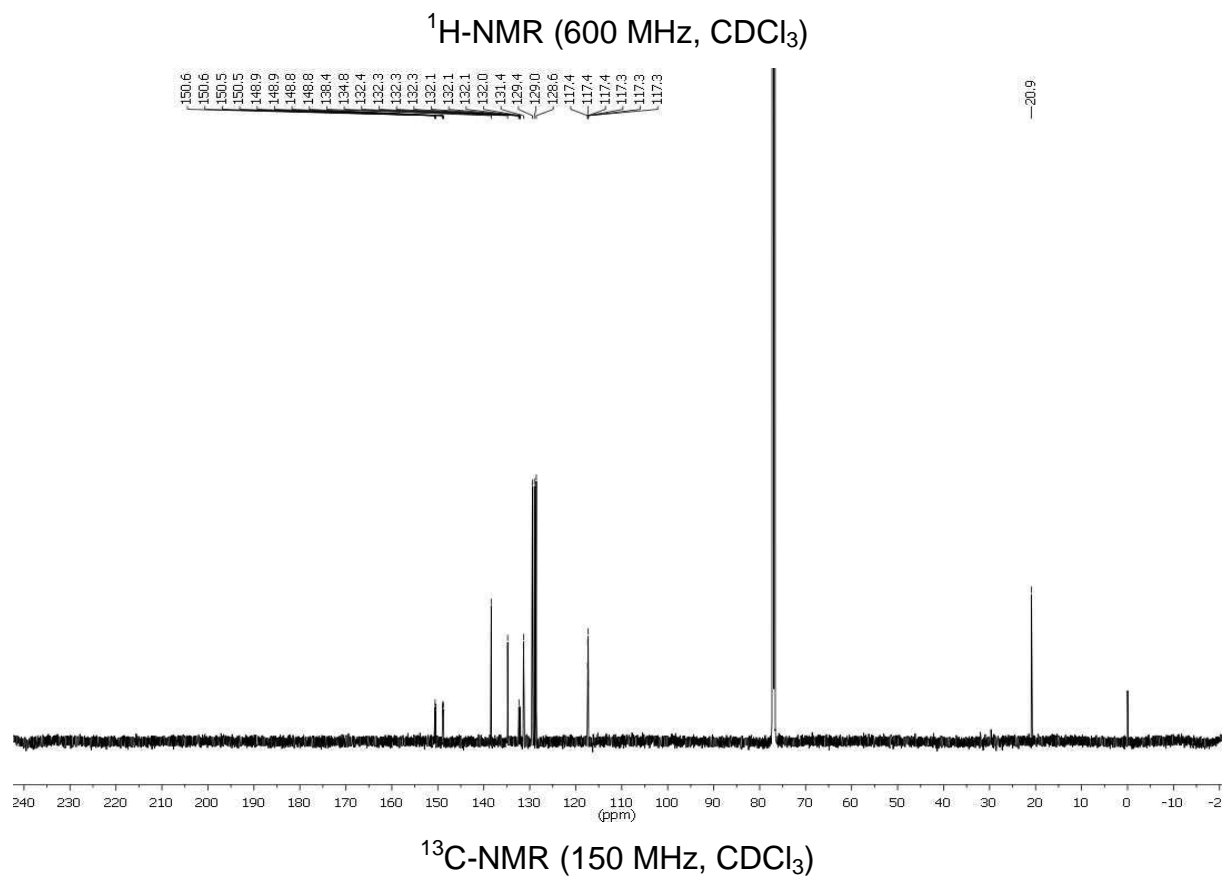

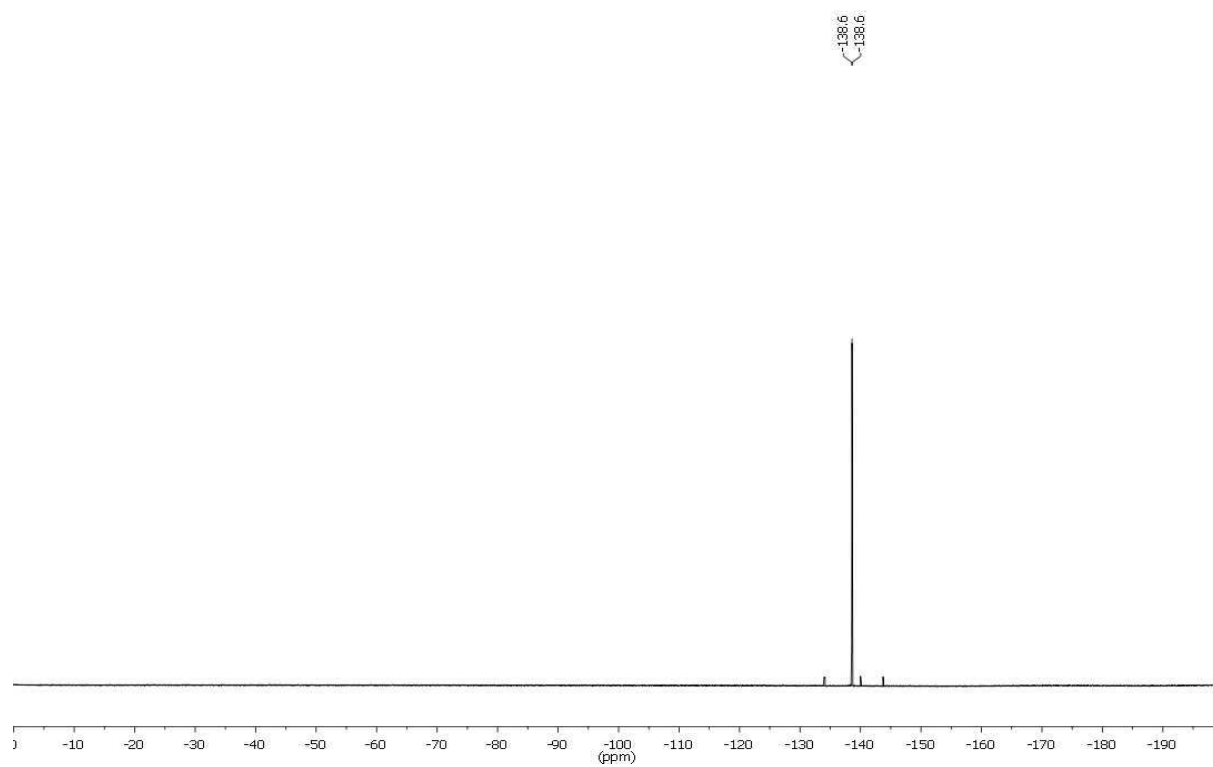

$^{19}\text{F}$ -NMR (376 MHz,  $\text{CDCl}_3$ )

### 2,3-dimethoxy-7-methylthianthrene (3bk)

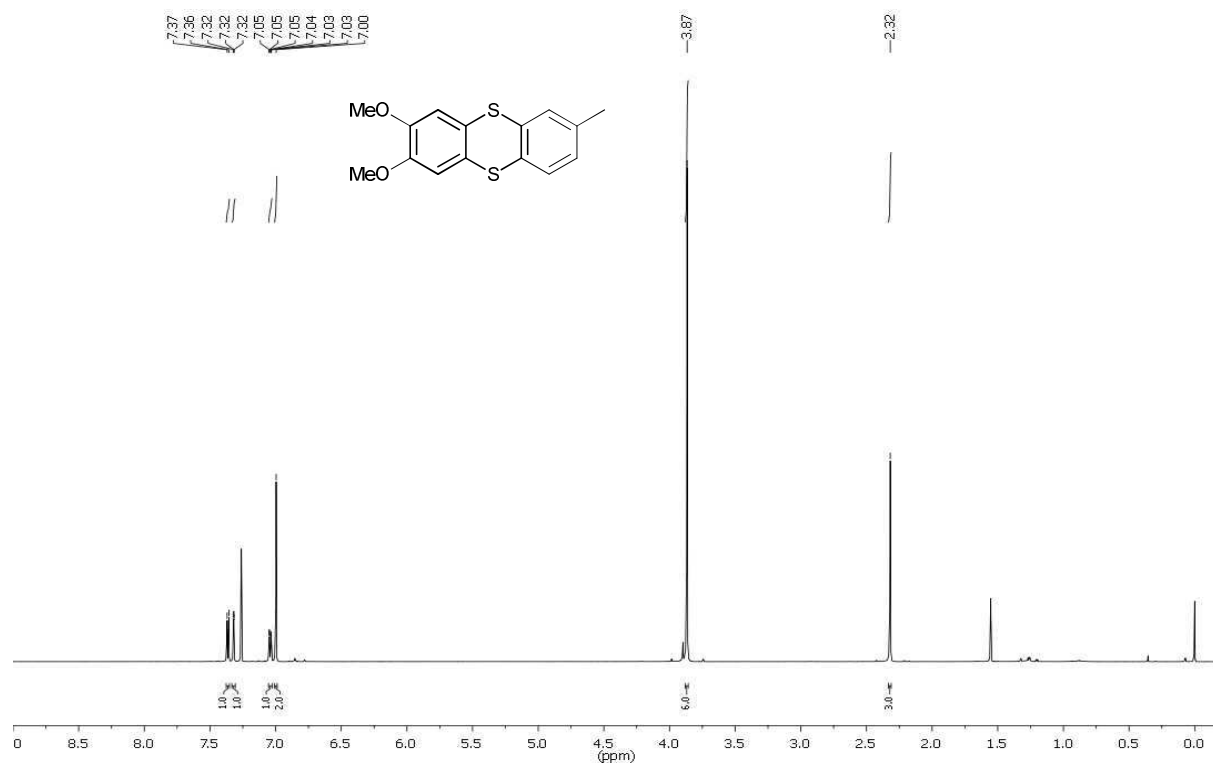

<sup>1</sup>H-NMR (600 MHz, CDCl<sub>3</sub>)

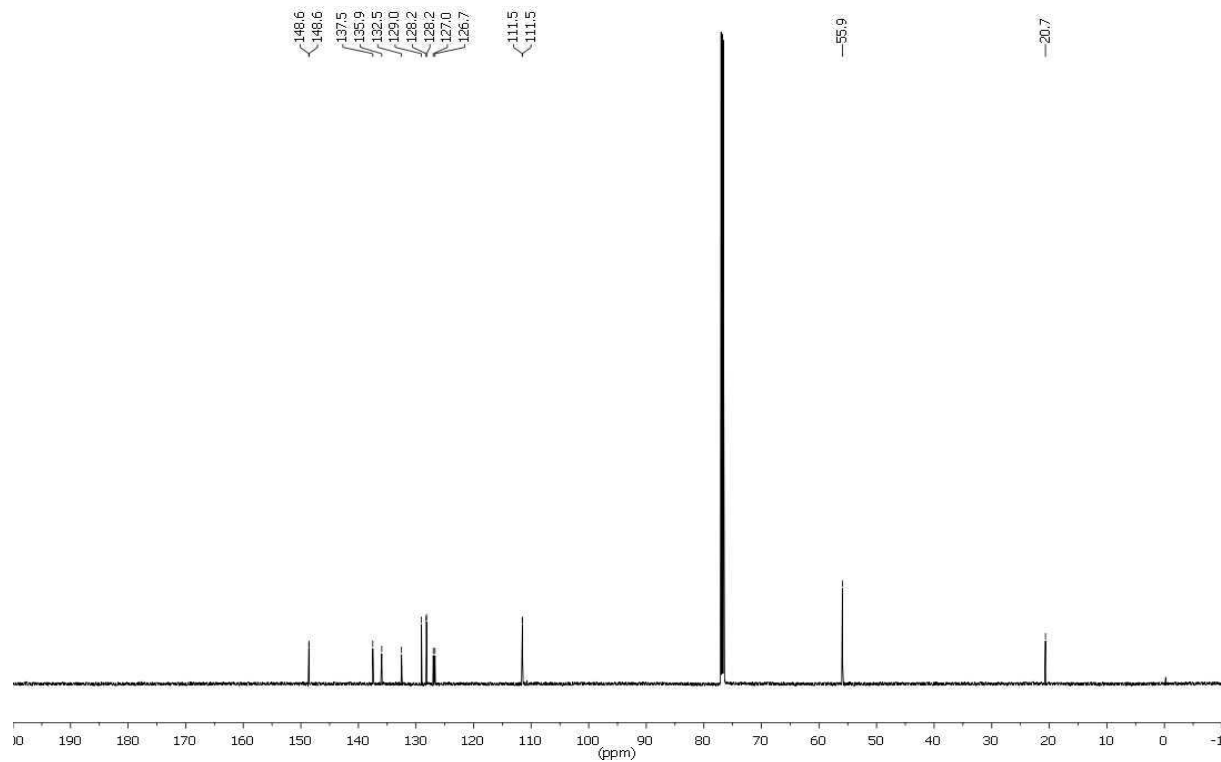

<sup>13</sup>C-NMR (150 MHz, CDCl<sub>3</sub>)

## 2,3-Diphenylbenzo[5,6][1,4]dithiino[2,3-g]quinoxaline (3ca)

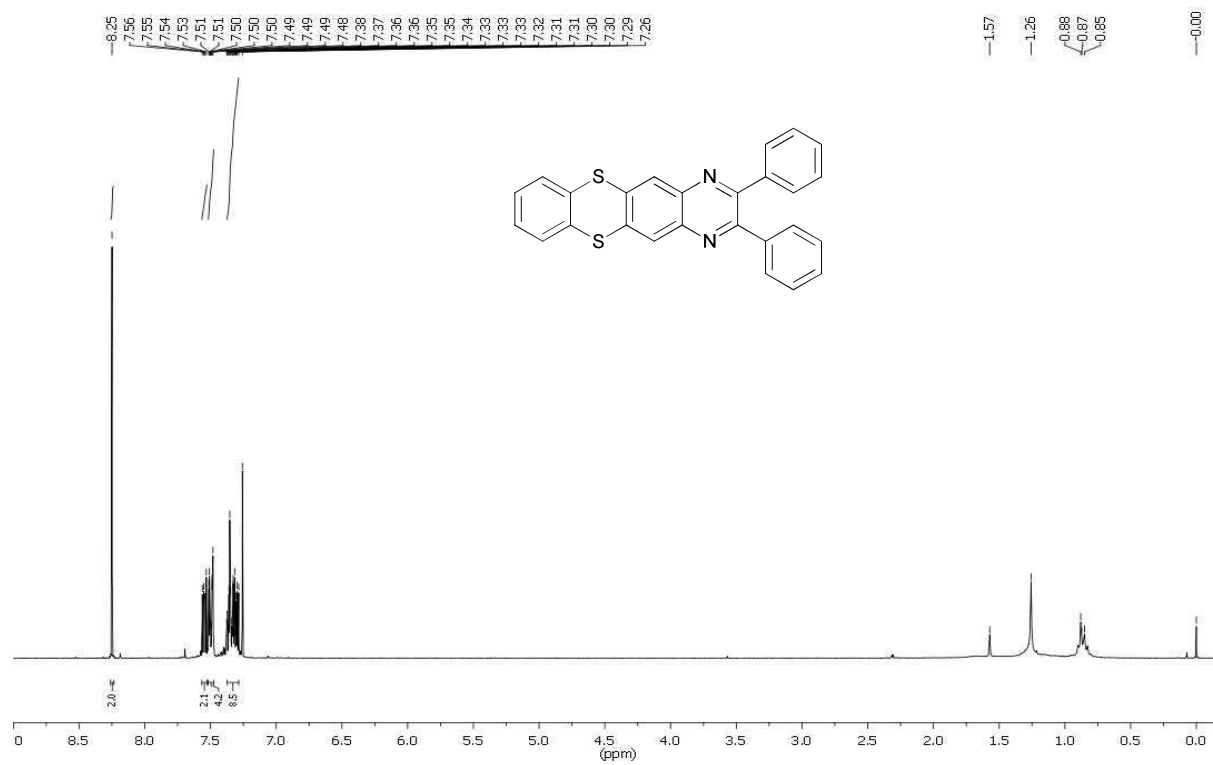

<sup>1</sup>H-NMR (300 MHz, CDCl<sub>3</sub>)

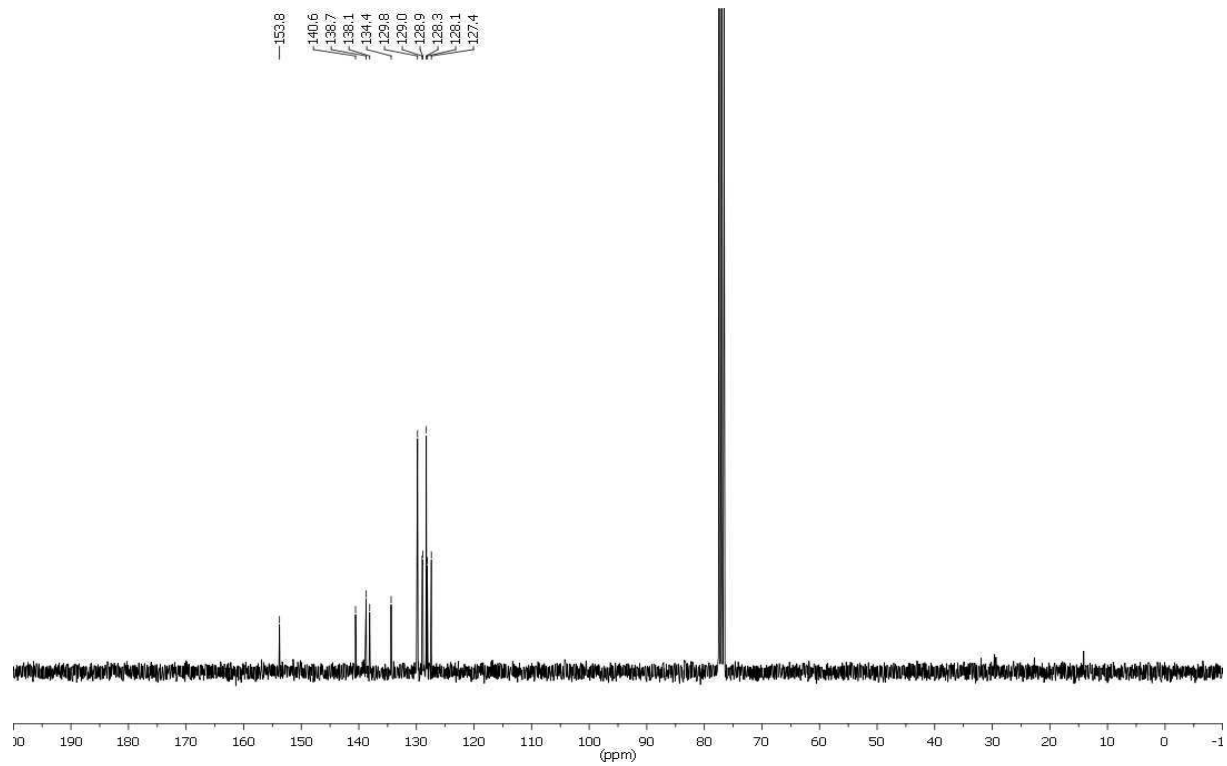

<sup>13</sup>C-NMR (75 MHz, CDCl<sub>3</sub>)



# 1-Methoxy-7-methylthianthrene (3bj) and 1-Methoxy-8-methylthianthrene (3bj')

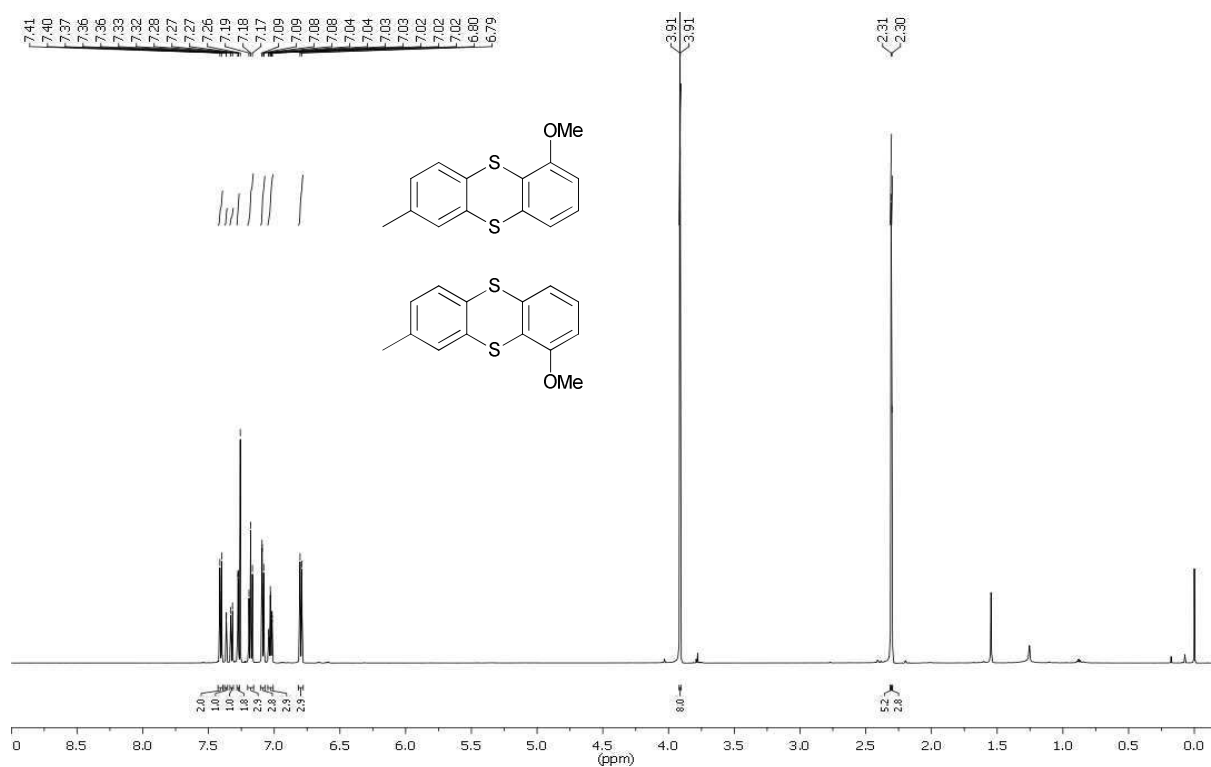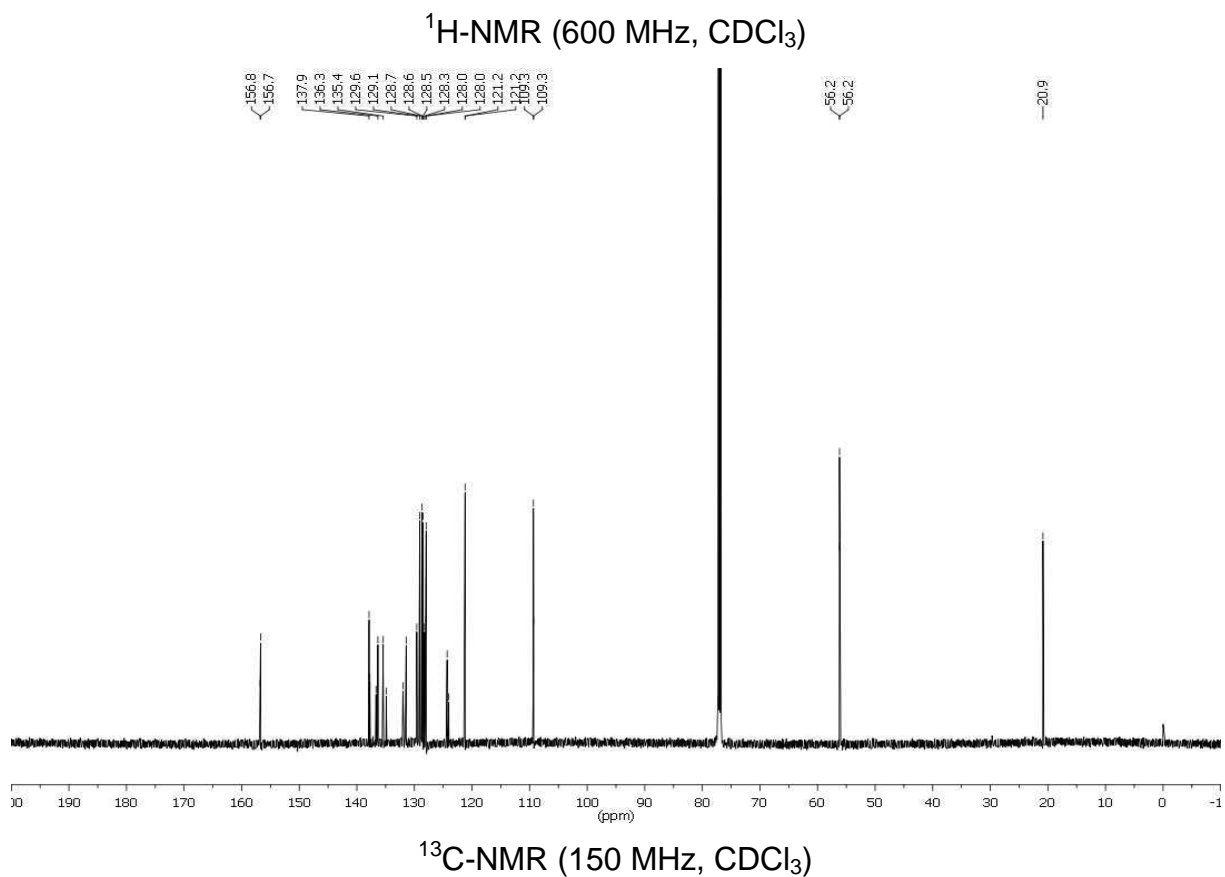

# 1,7-dimethylthianthrene (3bc) and 1,8-dimethylthianthrene (3bc')

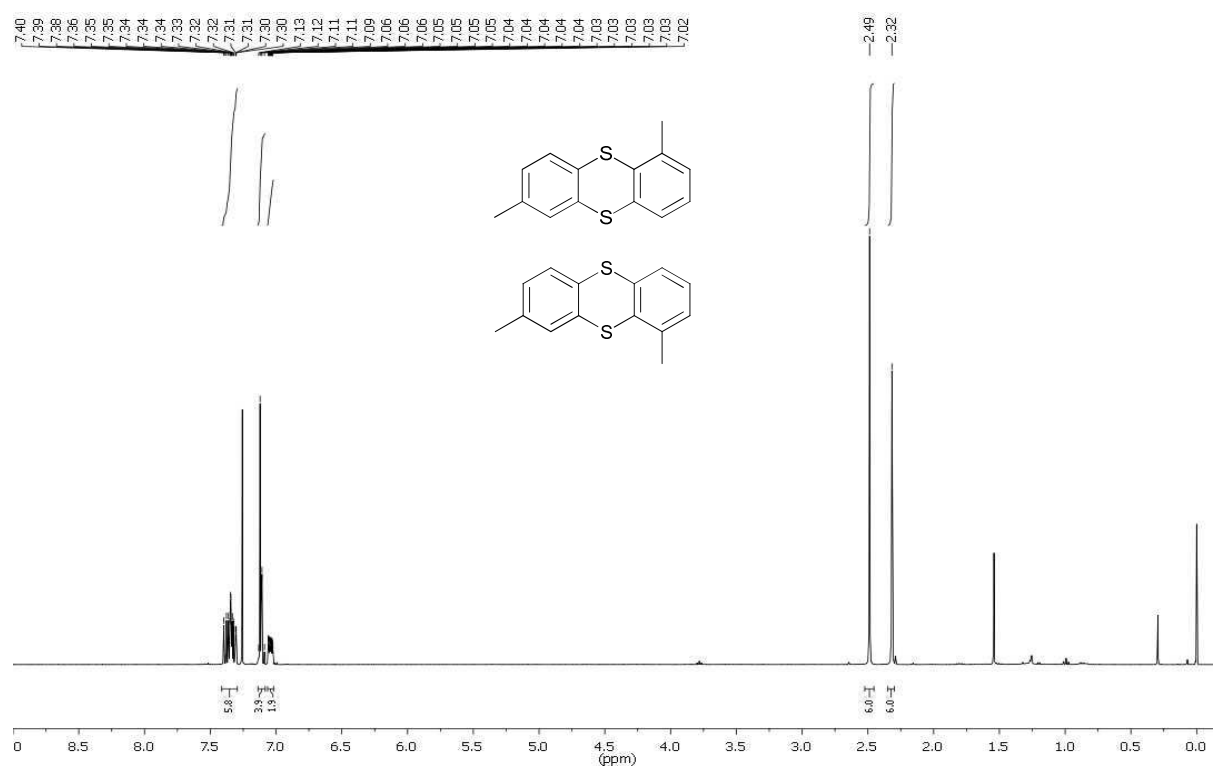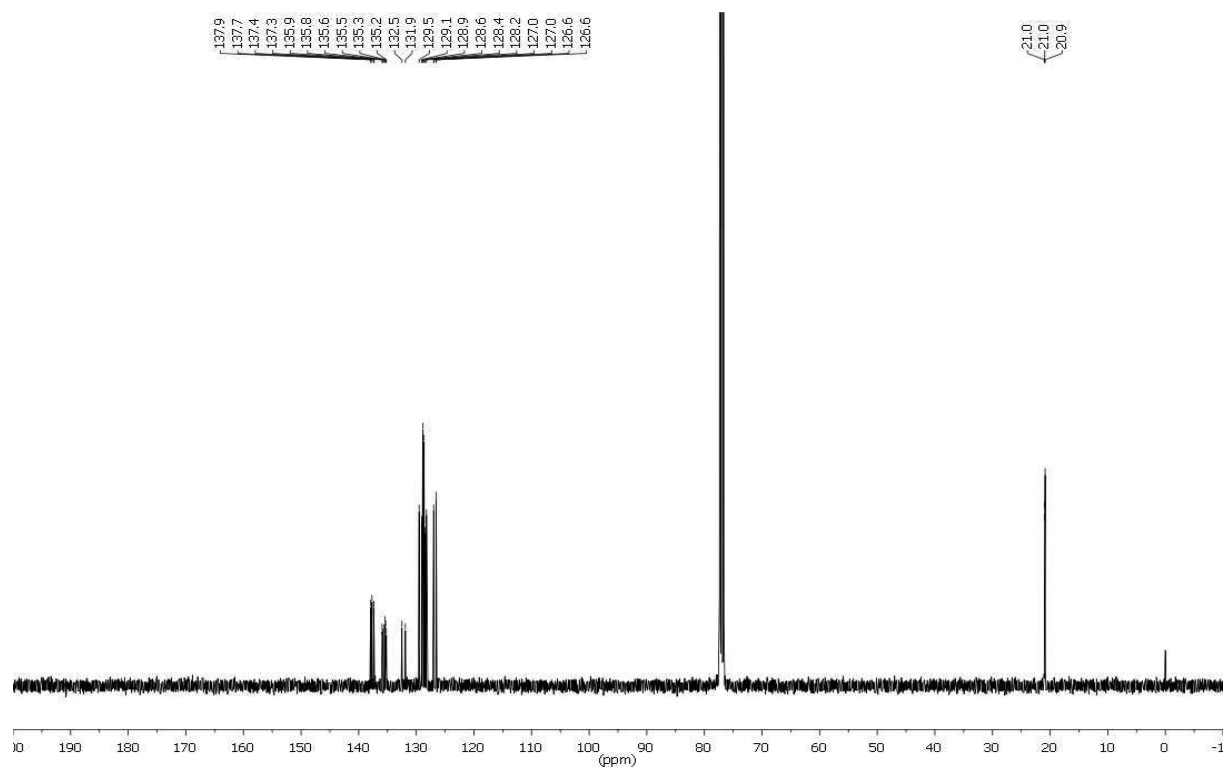

# Dimethyl benzo[*b*][1,4]dithiine-2,3-dicarboxylate (7aa)

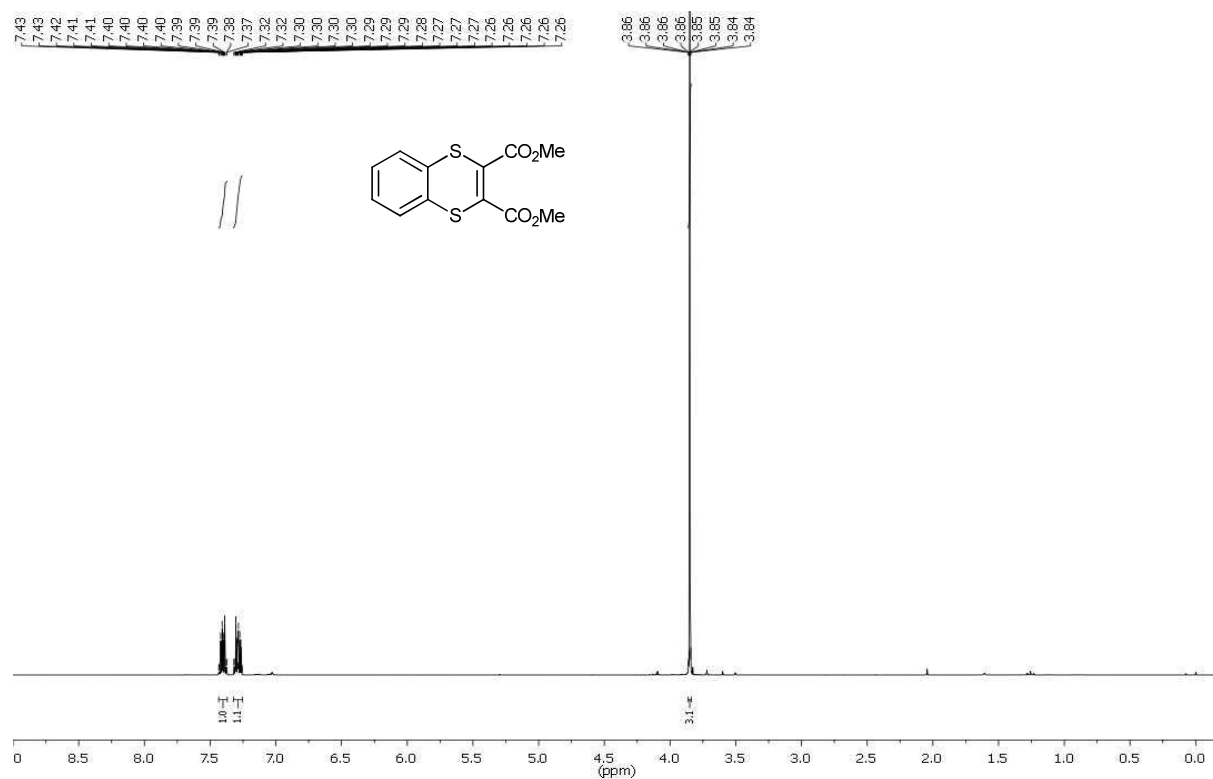

<sup>1</sup>H-NMR (300 MHz, CDCl<sub>3</sub>)

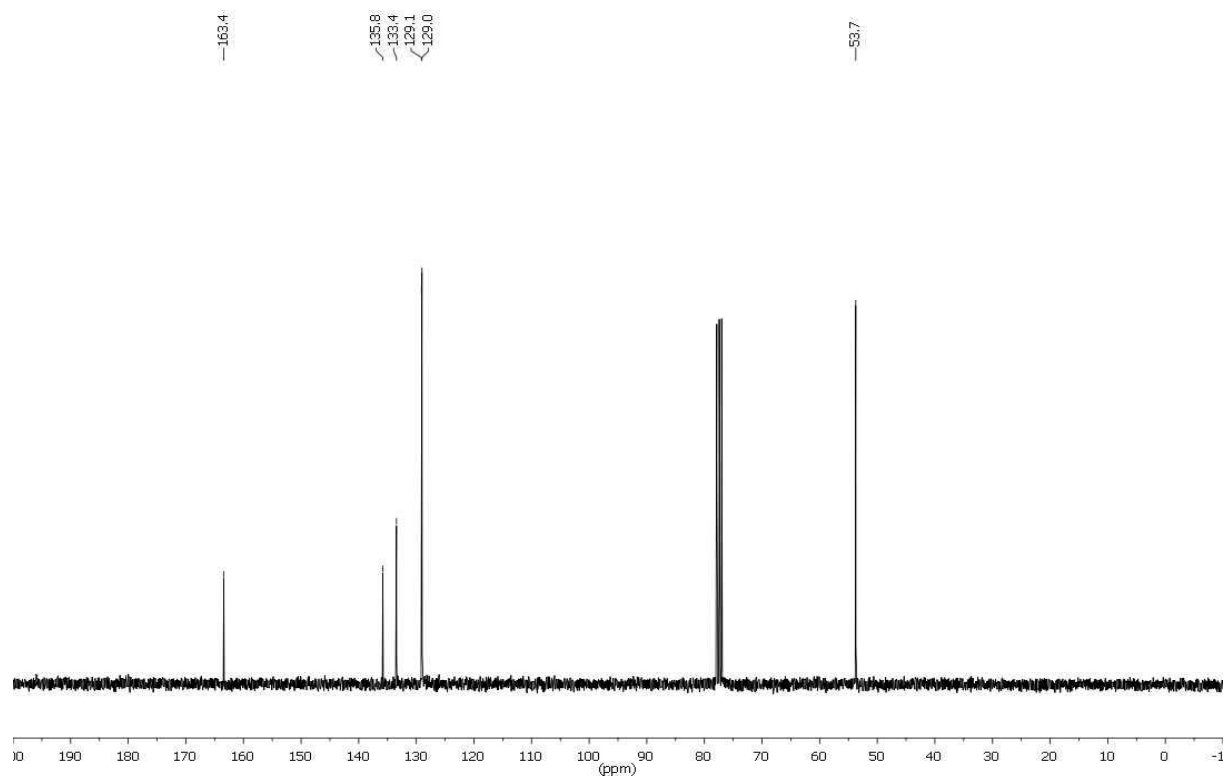

<sup>13</sup>C-NMR (75 MHz, CDCl<sub>3</sub>)

## 2-Methylbenzo[b]thianthrene (7ab)

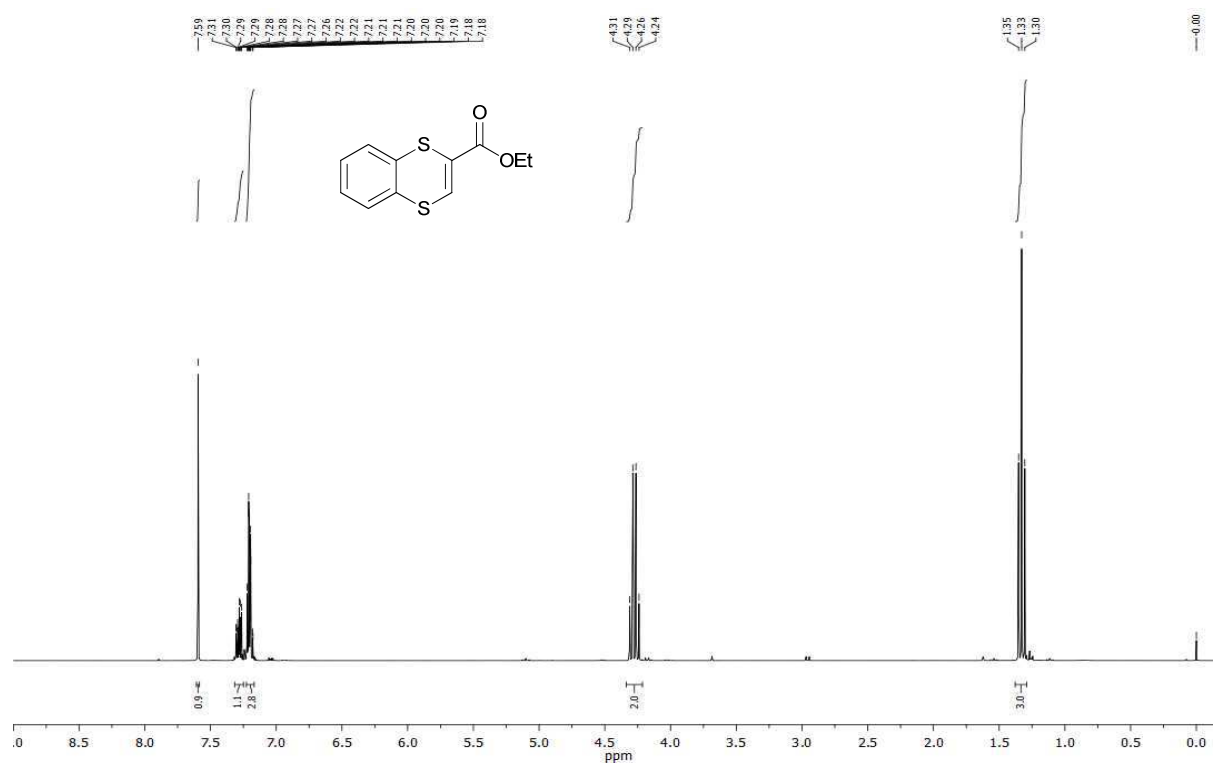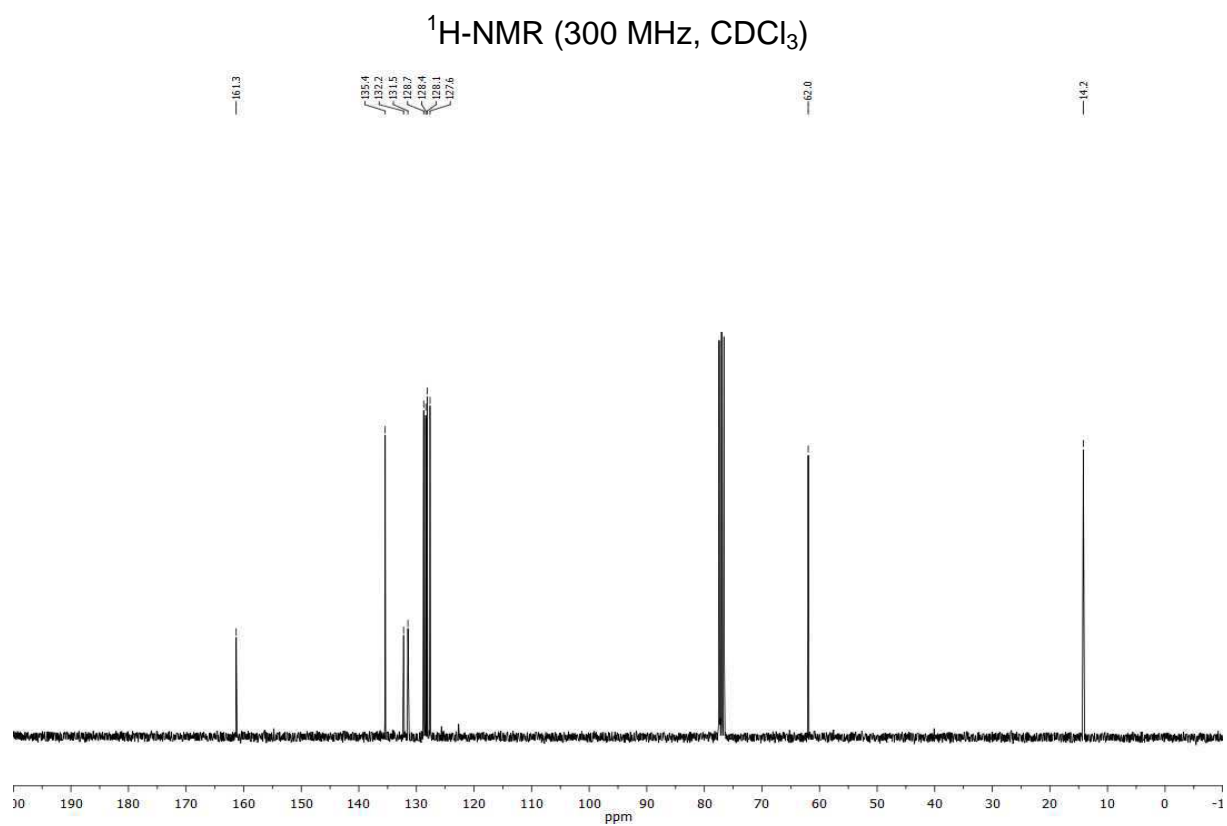

# 1-(Benzo[*b*][1,4]dithiin-2-yl)ethanone (7ac)

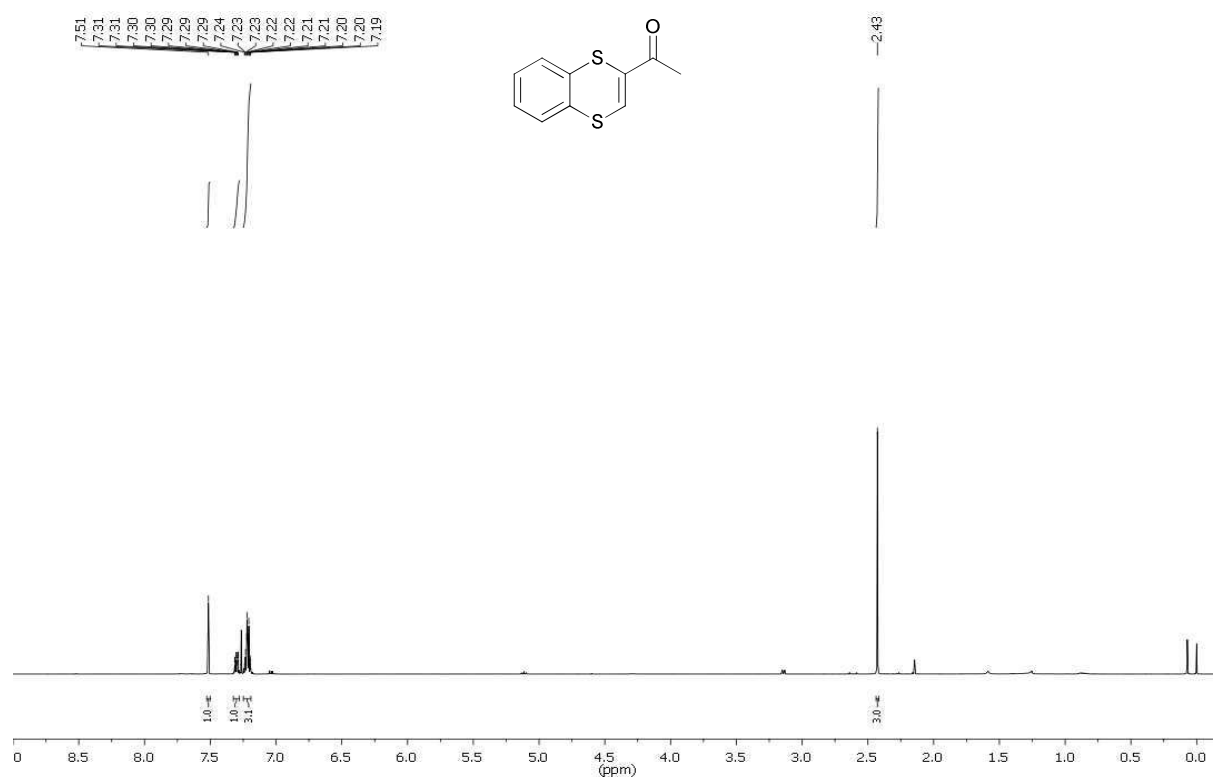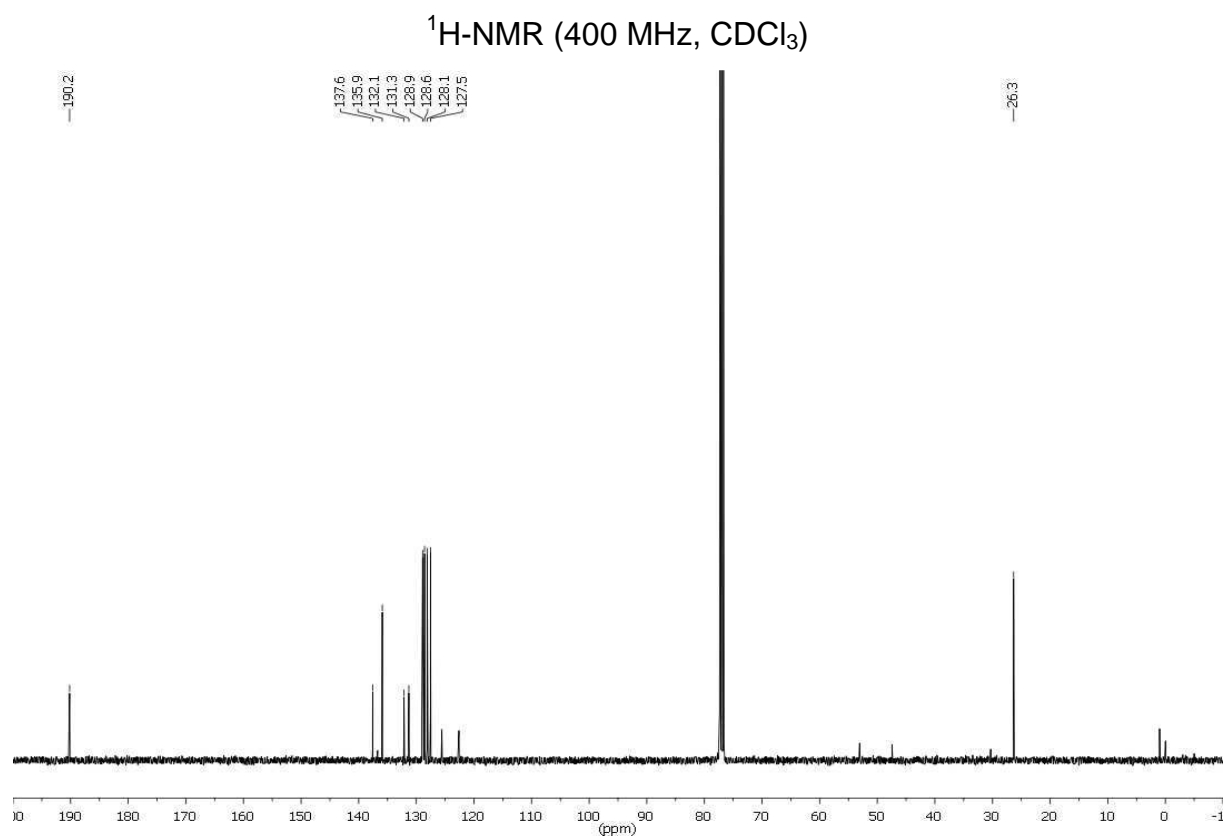

<sup>13</sup>C-NMR (100 MHz, CDCl<sub>3</sub>)

# 1-(3-Phenylbenzo[*b*][1,4]dithiin-2-yl)ethanone (7ad)

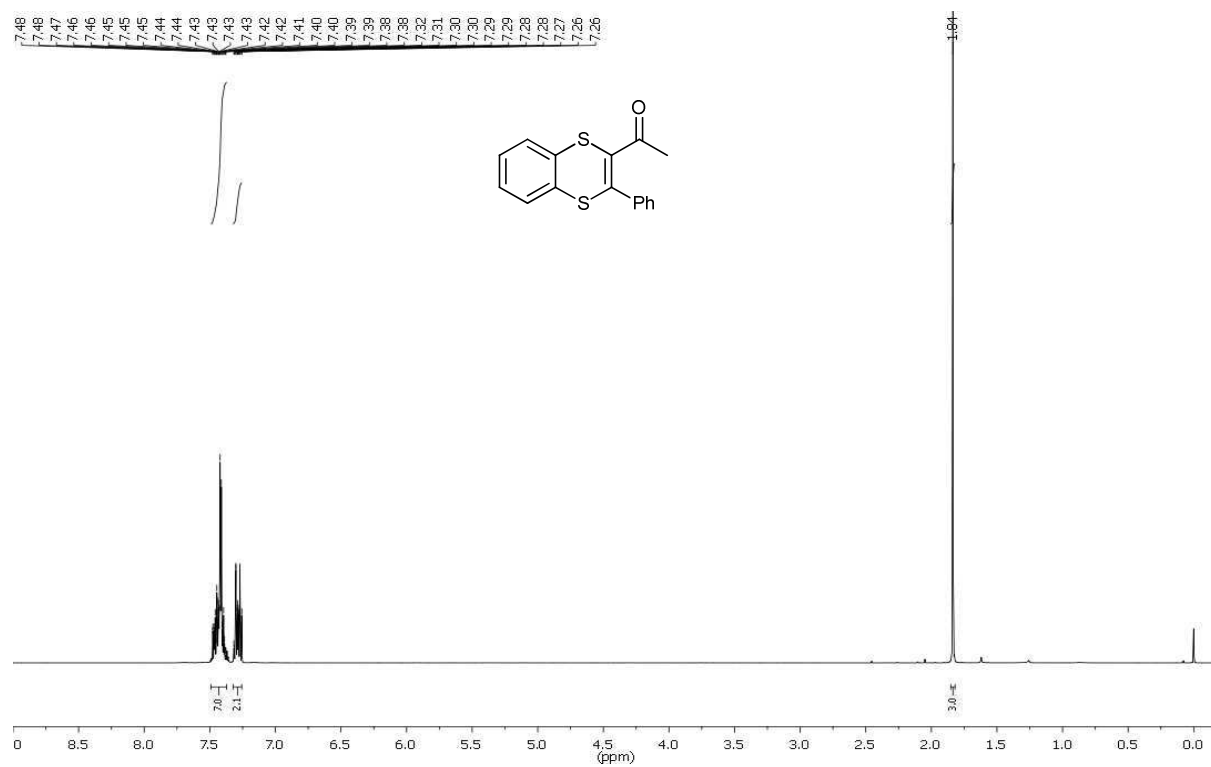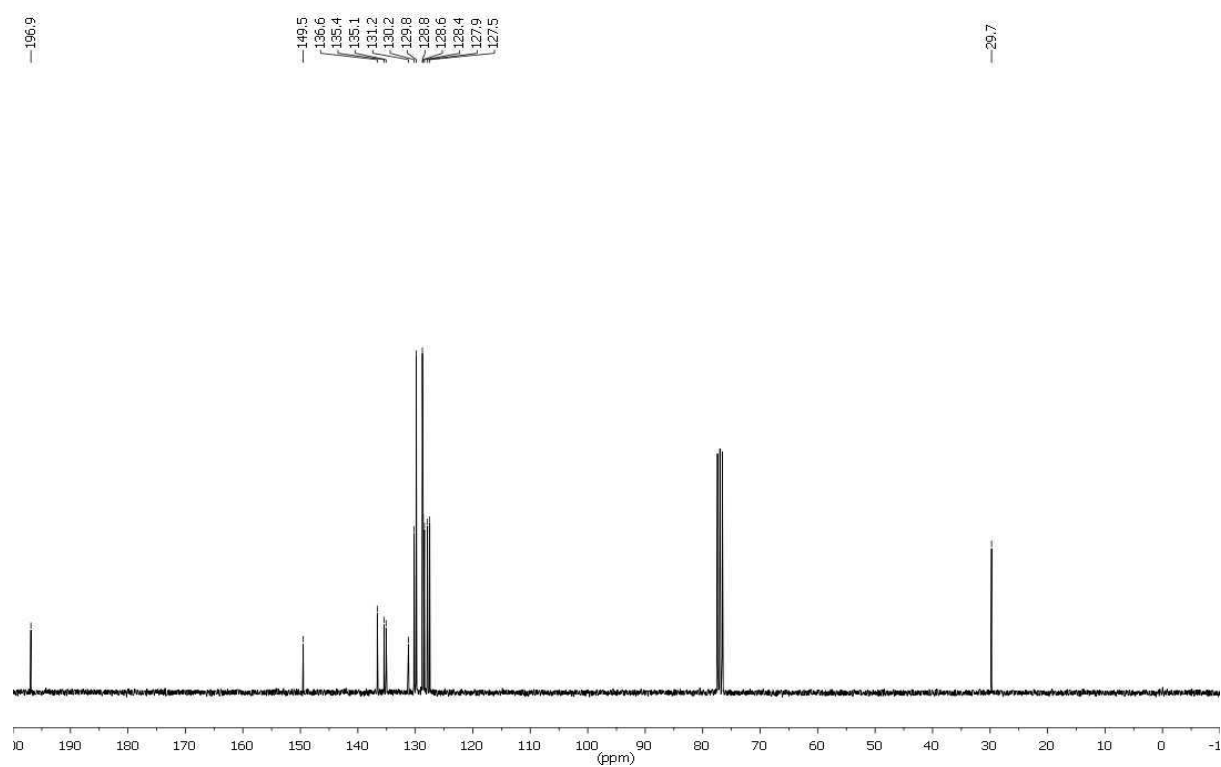

# Dimethyl 6-methylbenzo[*b*][1,4]dithiine-2,3-dicarboxylate (7ba)

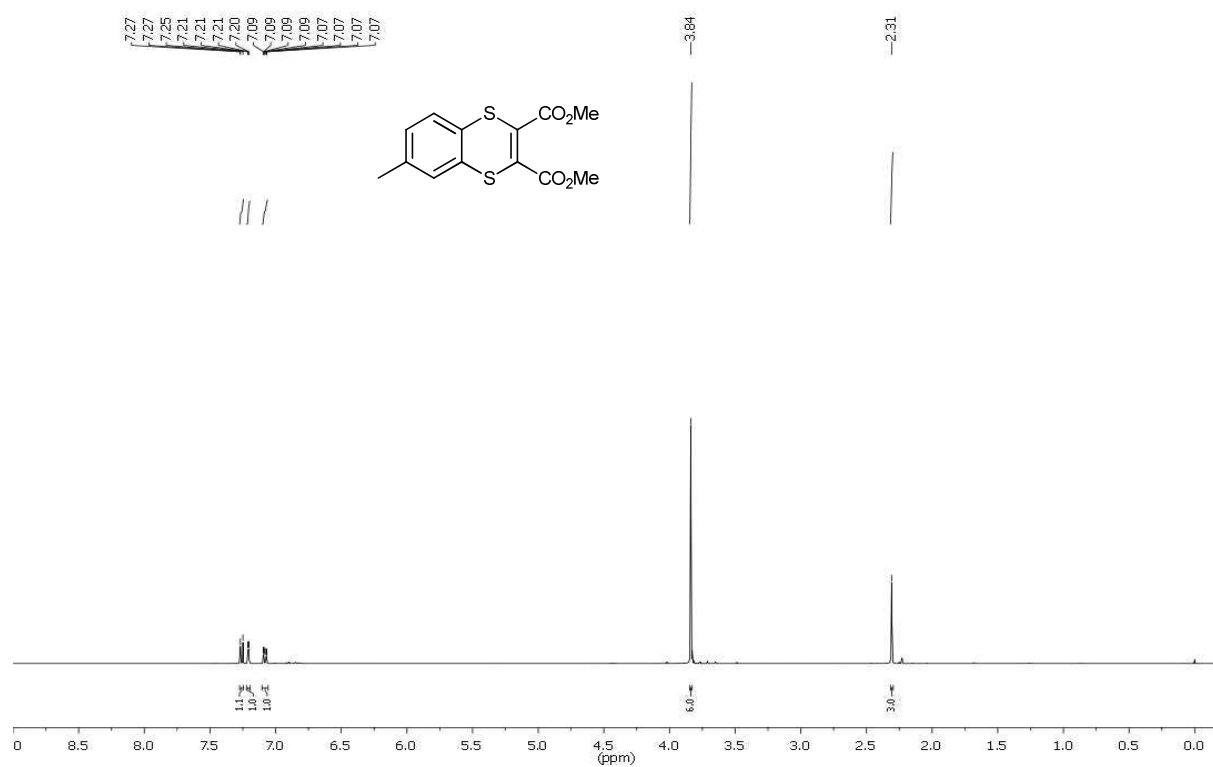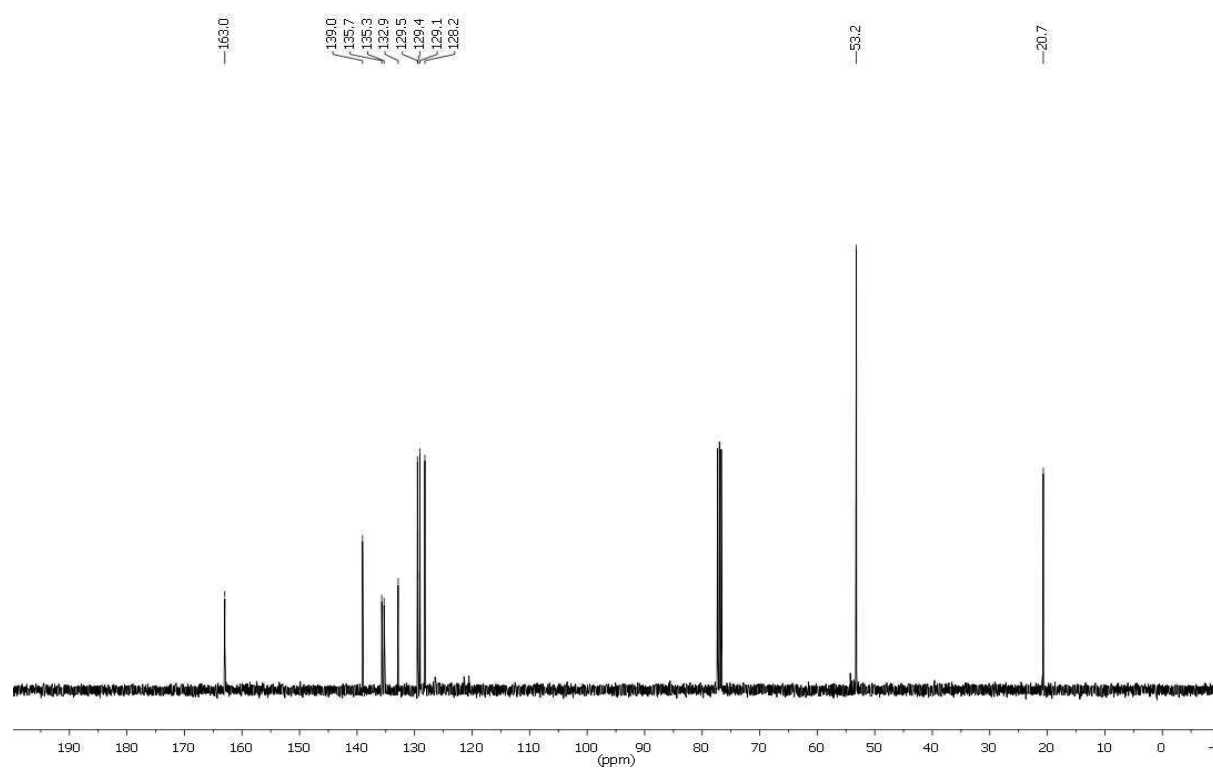

# Dimethyl 7,8-diphenyl-[1,4]dithiino[2,3-g]quinoxaline-2,3-dicarboxylate (7ca)

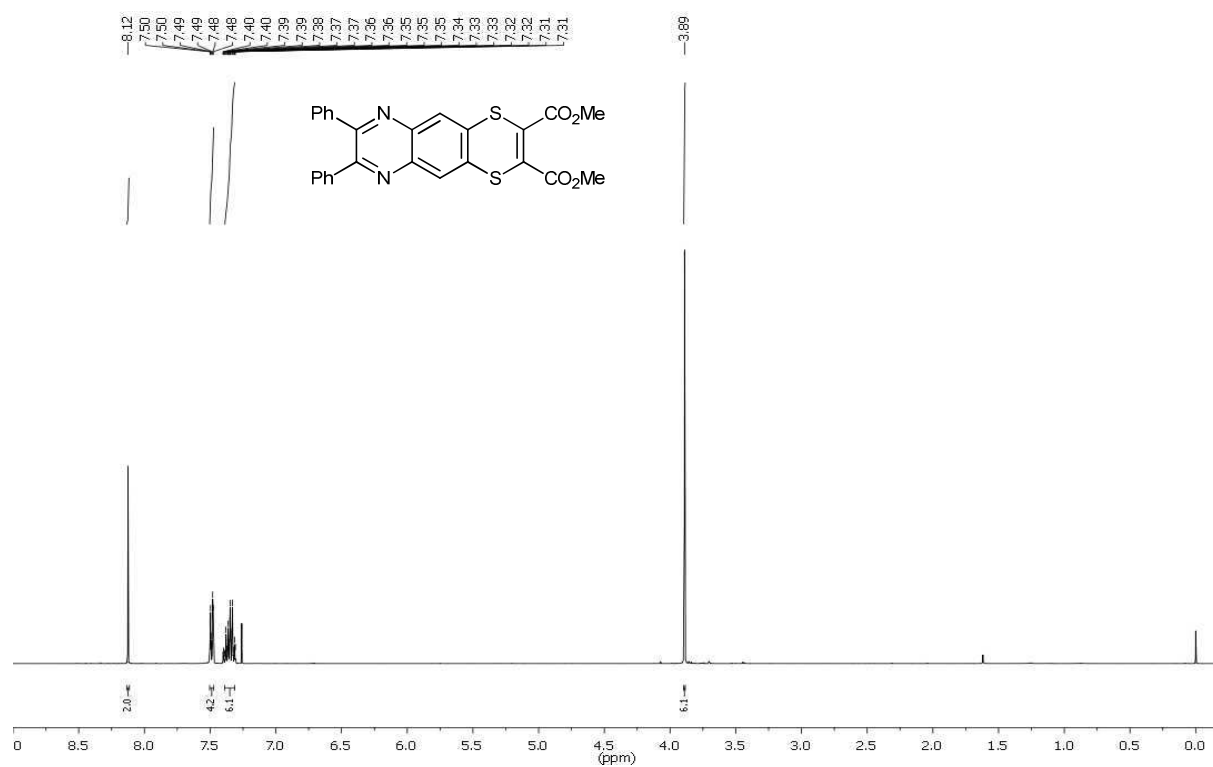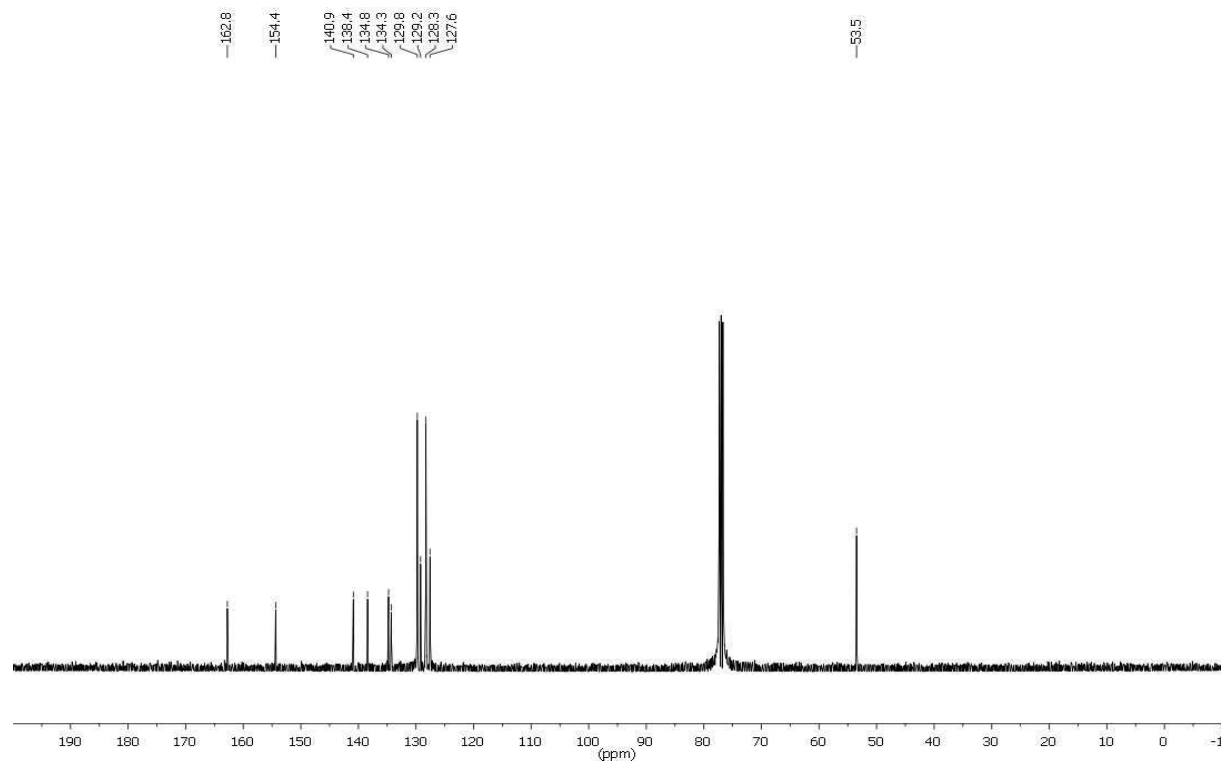



Dimethyl [1,4]dithiino[2',3':4,5]benzo[1,2-c][1,2,5]thiadiazole-6,7-dicarboxylate  
(7da)

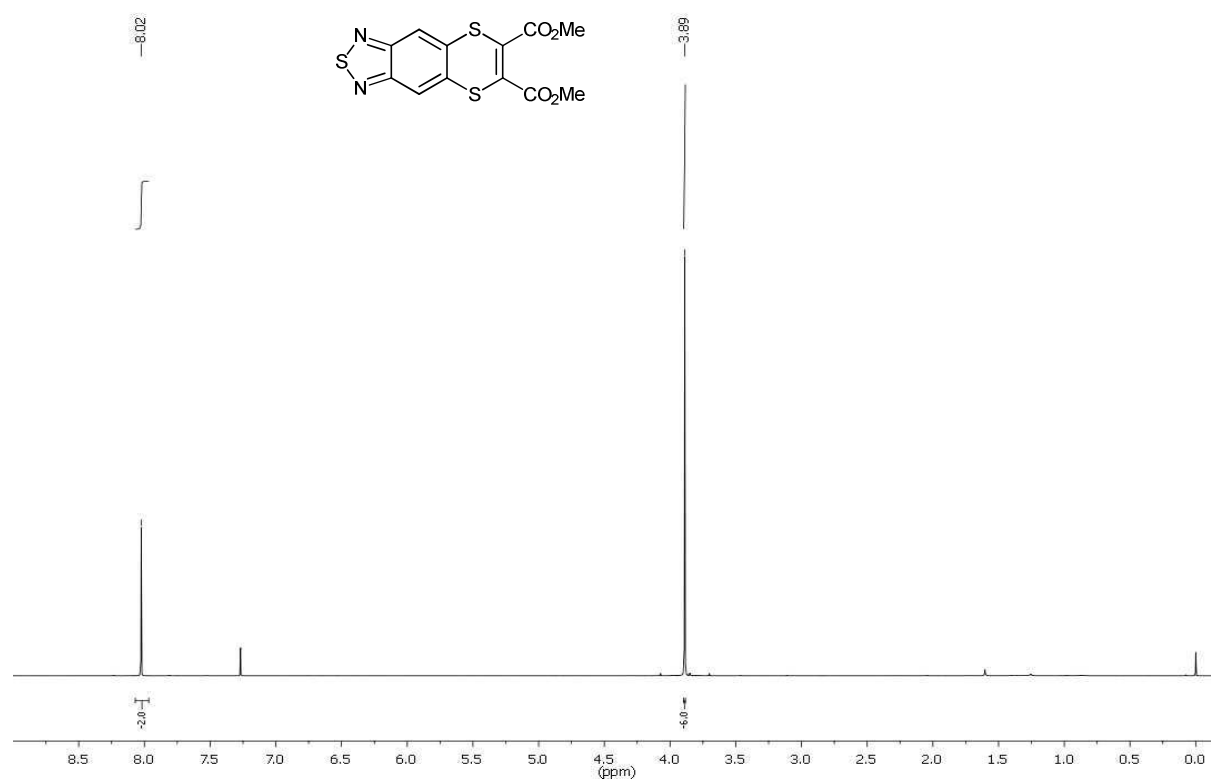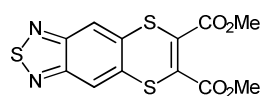

<sup>1</sup>H-NMR (400 MHz, CDCl<sub>3</sub>)

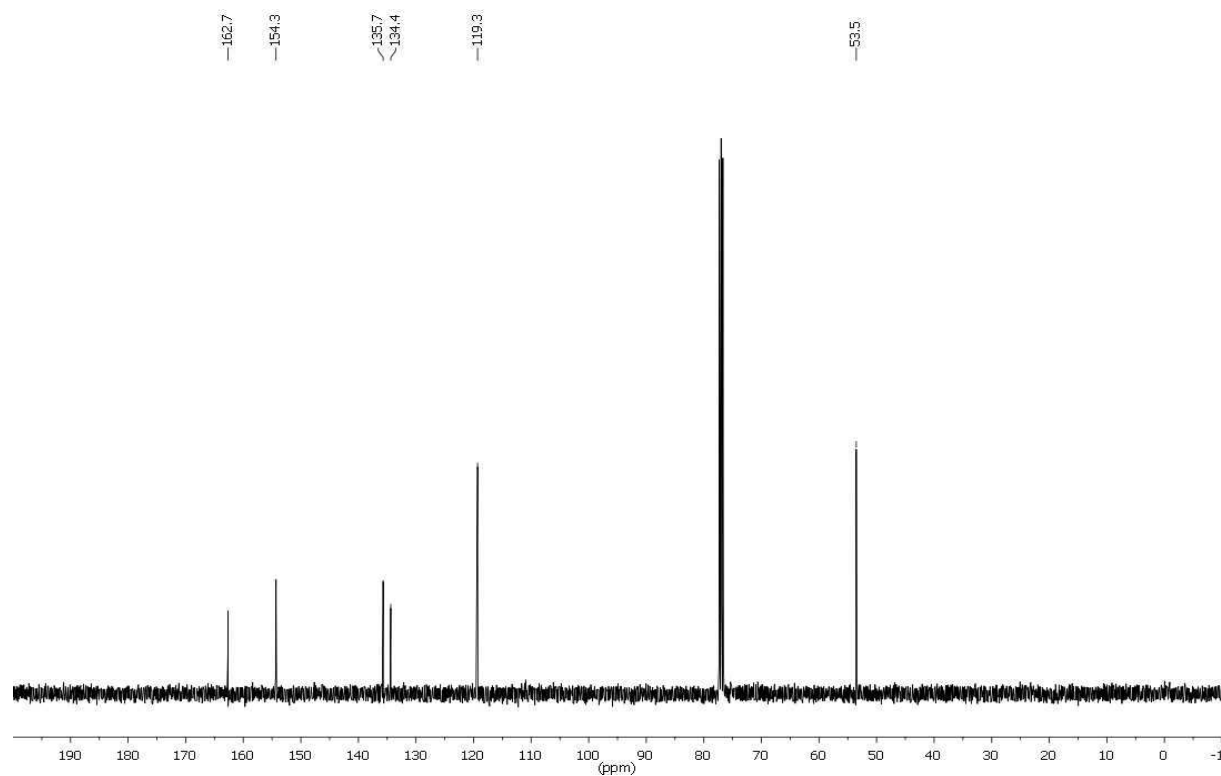

<sup>13</sup>C-NMR (100 MHz, CDCl<sub>3</sub>)

# 1-(3-Phenylpyrrolo[2,1-b]thiazol-2-yl)ethanone (10ad)

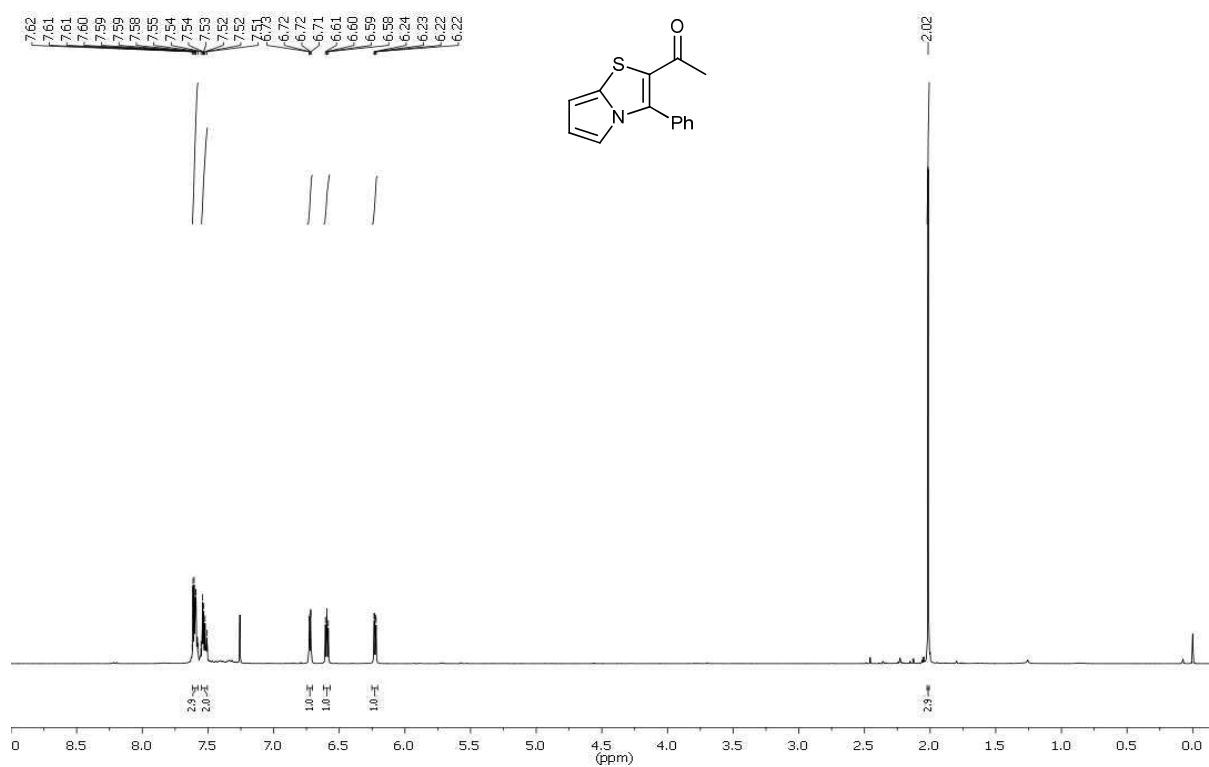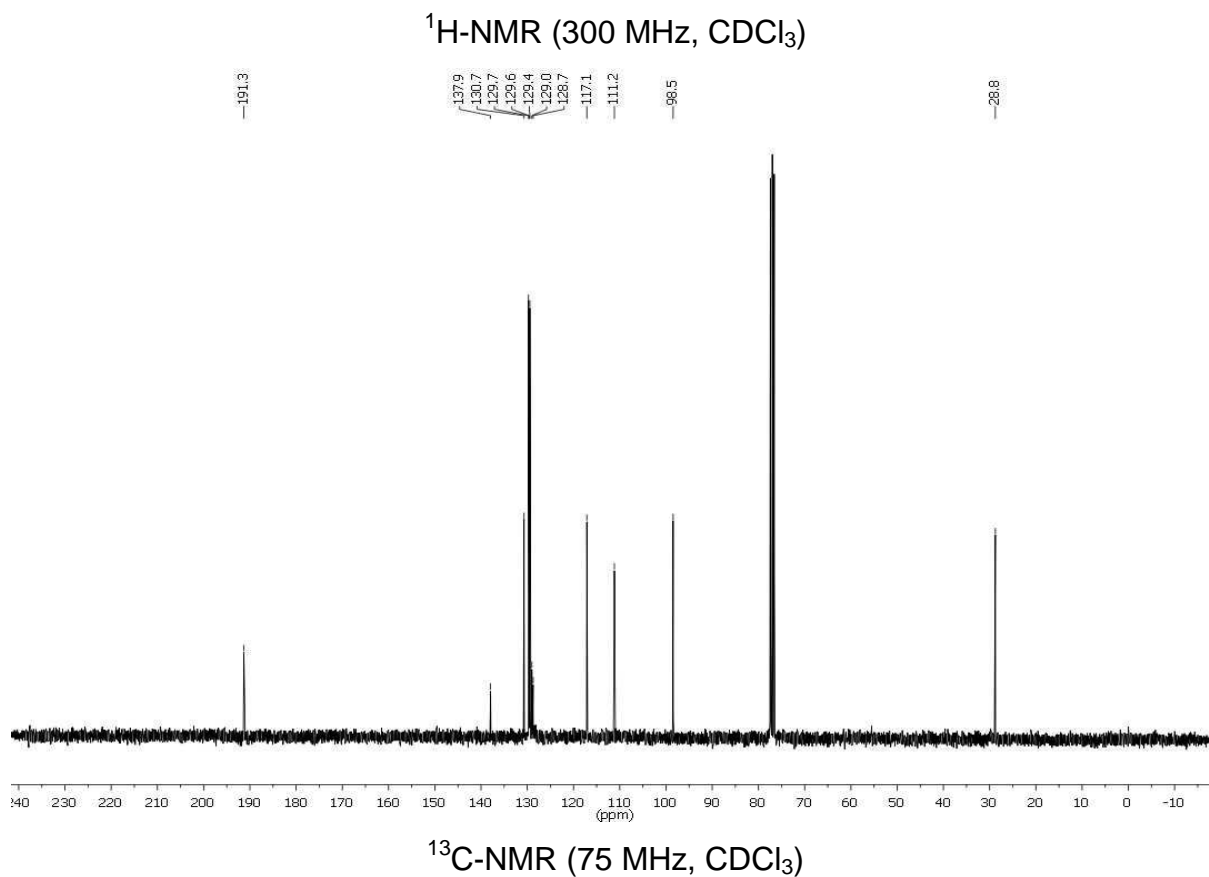

# Dimethyl 5-ethylpyrrolo[2,1-*b*]thiazole-2,3-dicarboxylate (10ba)

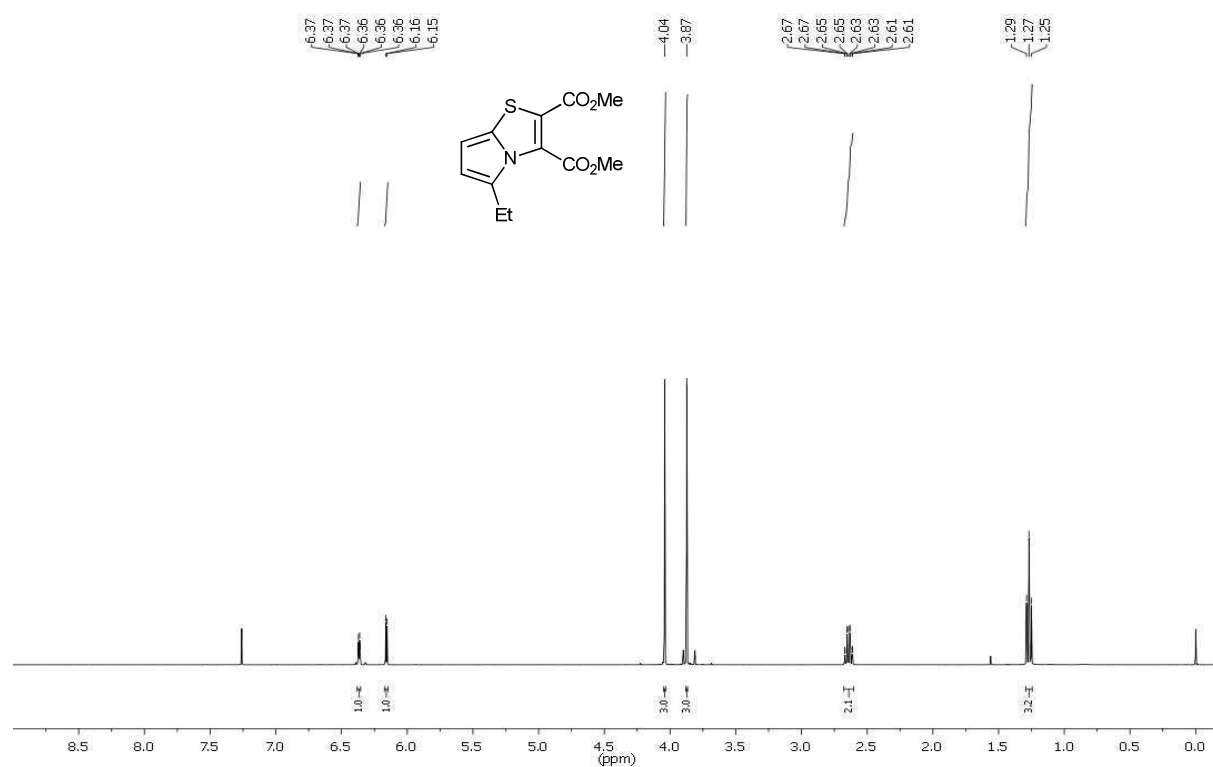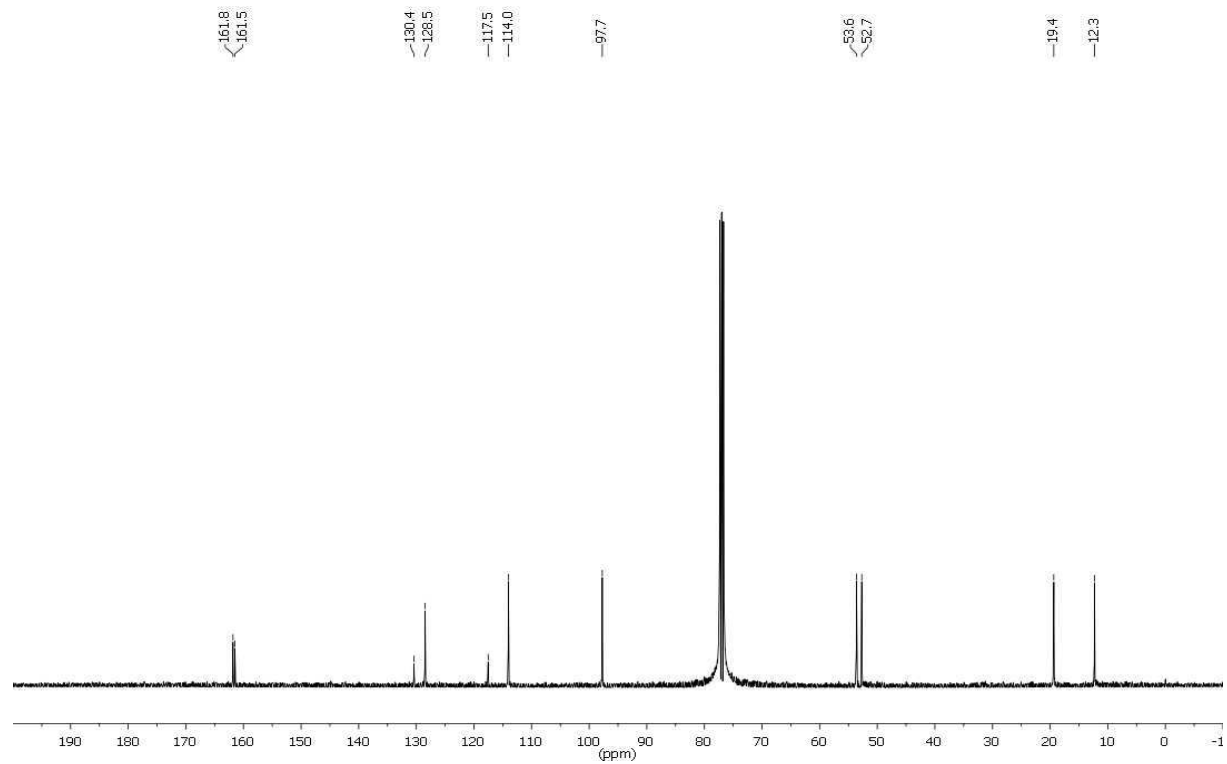

# Ethyl 5-ethylpyrrolo[2,1-b]thiazole-2-carboxylate (10bb)

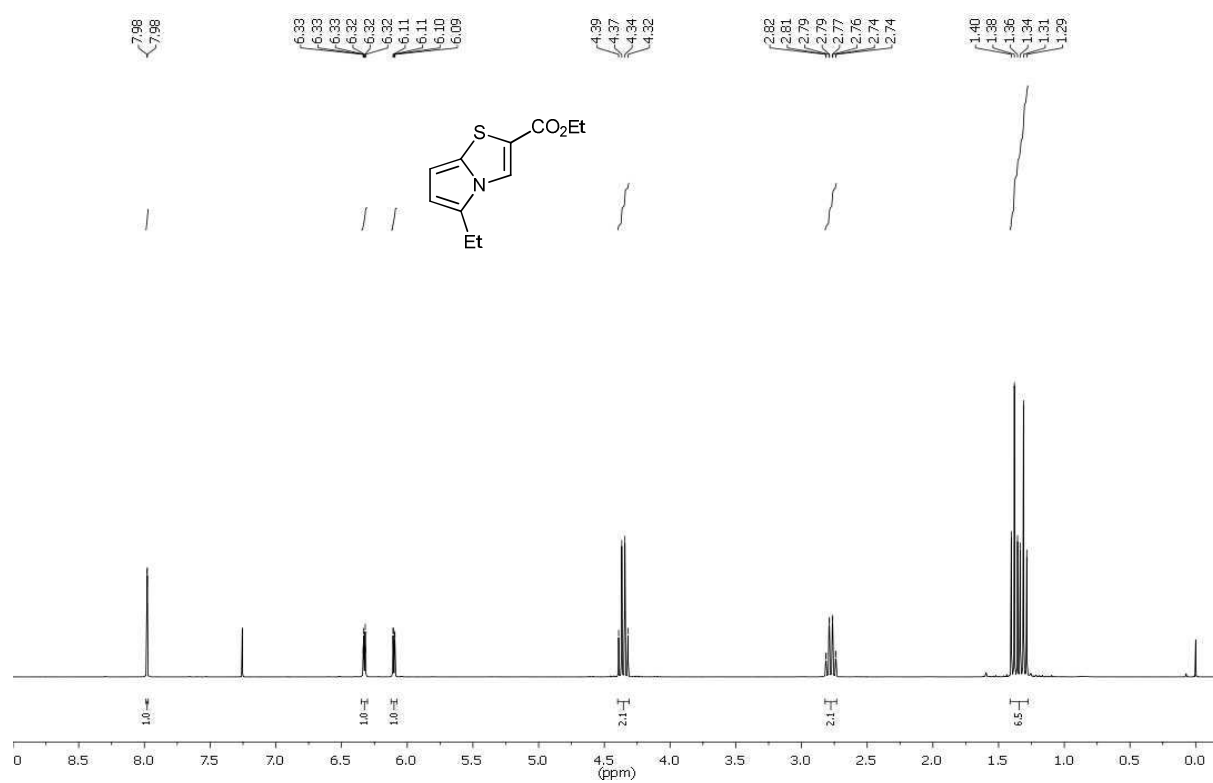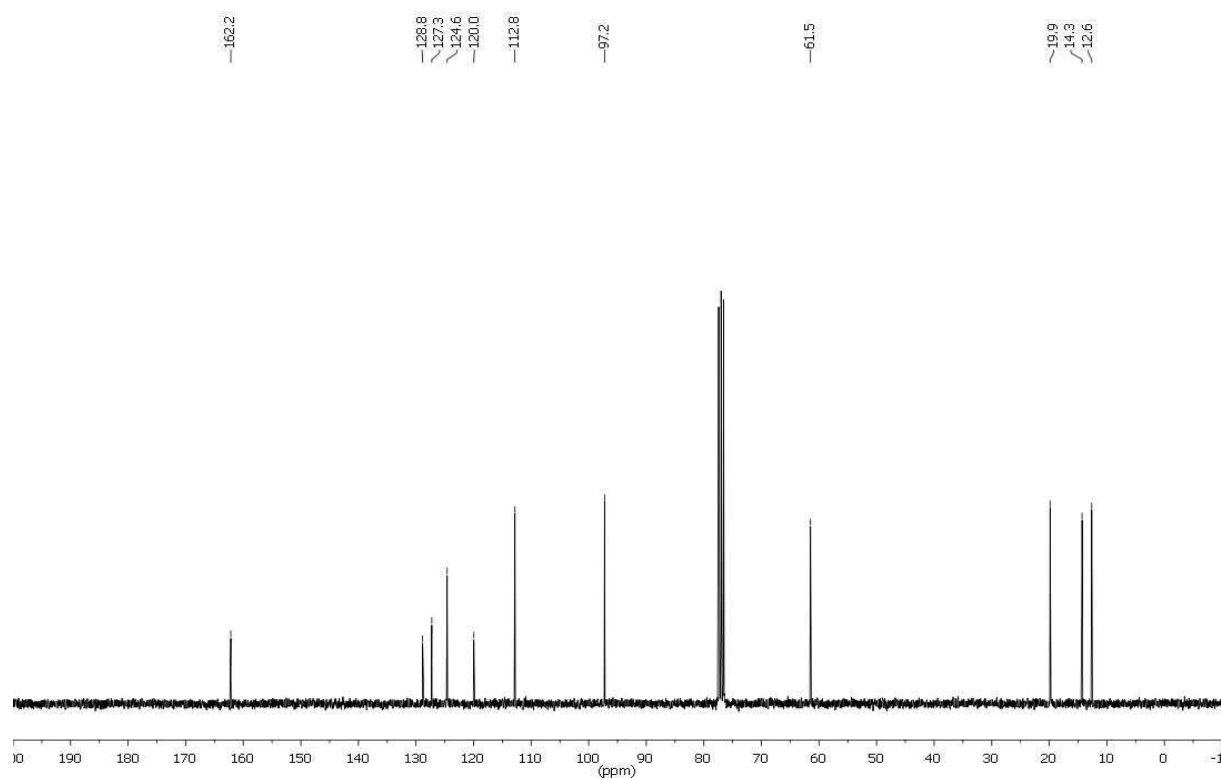

# Phenyl(2-thiocyanatophenyl)sulfane (12a)

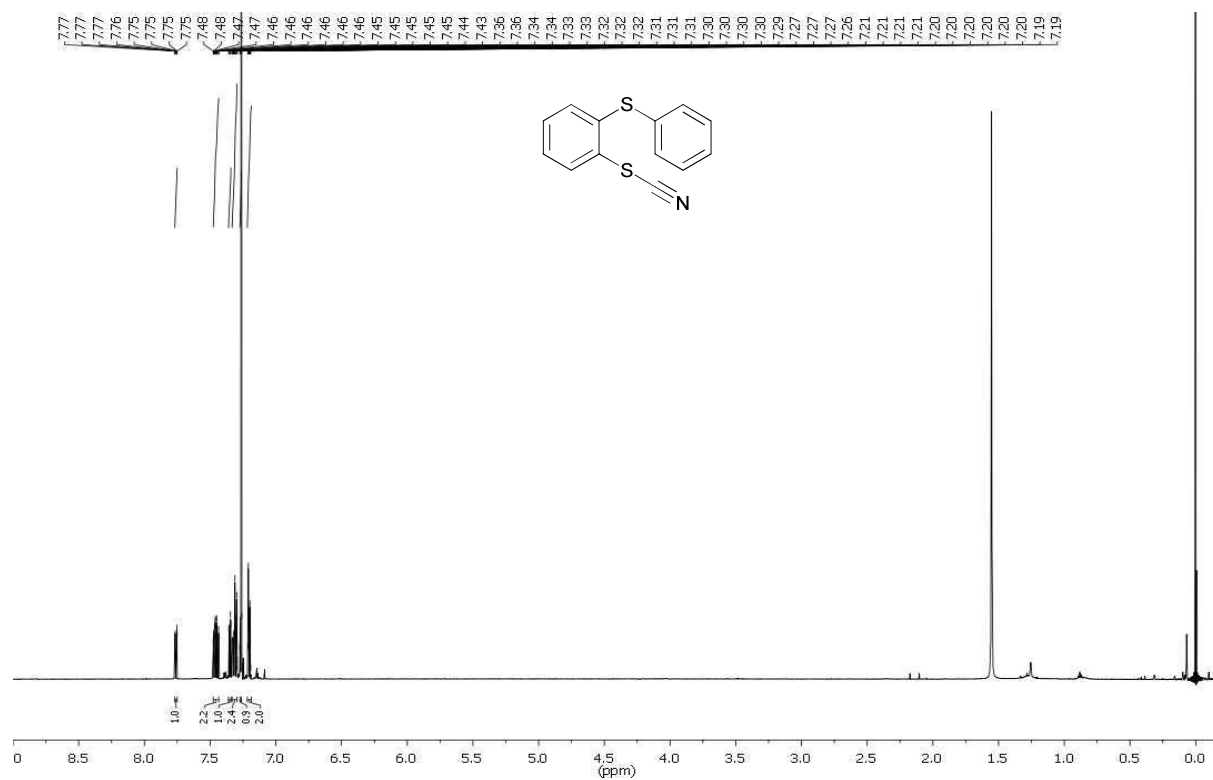

## <sup>1</sup>H-NMR (600 MHz, CDCl<sub>3</sub>)

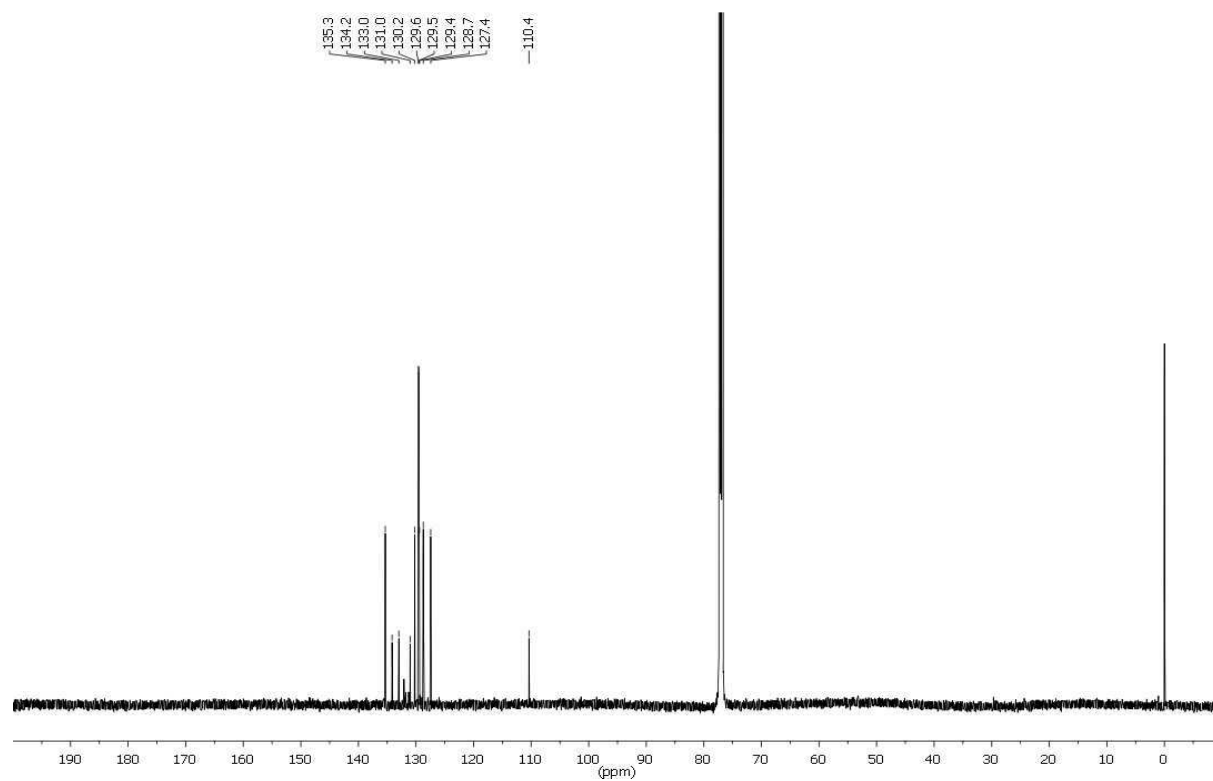

## <sup>13</sup>C-NMR (150 MHz, CDCl<sub>3</sub>)

## Literature:

- [1] G. Durgaprasad, R. Bolligarla and S. K. Das, *J. Organomet. Chem.*, 2012, **706-707**, 37.
- [2] J. L. Brusso, O. P. Clements, R. C. Haddon, M. E. Itkis, A. A. Leitch, R. T. Oakley, R. W. Reed and J. F. Richardson, *J. Am. Chem. Soc.*, 2004, **126**, 8256.
- [3] C. Tao, A. Lv, N. Zhao, S. Yang, X. Liu, J. Zhou, W. Liu and J. Zhao, *Synlett*, 2011, 134.
- [4] D. S. Bhalerao and K. G. Akamanchi, *Synlett*, 2007, 2952.
- [5] J. I. G. Cadogan, B. A. J. Clark, D. Ford, R. J. MacDonald, A. D. MacPherson, H. McNab, I. S. Nicolson, D. Reed and C. C. Sommerville, *Org. Biomol. Chem.*, 2009, **7**, 5173.
